1 **Title**

2 Microlitter pollution in the marine environment and preliminary evidences of *in vitro* cytotoxic  
3 effects on two Mediterranean commercial fish species

4

5 **Authors**

6 Miccoli A\*<sup>1</sup>, Mancini E<sup>2</sup>, Saraceni PR<sup>1</sup>, Della Ventura G<sup>3,4</sup>, Scapigliati G<sup>1</sup> and Picchietti S<sup>1</sup>

7 <sup>1</sup> Department for Innovation in Biological, Agro-food and Forest Systems, University of

8 Tuscia, Viterbo, 01100, Italy

9 <sup>2</sup> Italian Fishery Research and Studies Center, Rome, 00184, Italy

10 <sup>3</sup> Department of Science, Roma 3 University, Rome, 00146, Italy

11 <sup>4</sup> INFN Laboratori Nazionali di Frascati, Via E. Fermi 54, Frascati, 00044, Italy

12 \*Corresponding author, [andrea.miccoli@unitus.it](mailto:andrea.miccoli@unitus.it)

13

14 **ORCID**

15 AM: 0000-0002-4545-7229

16 SP: 0000-0002-6116-213X

17 GDV: 0000-0001-6277-961X

18 **Abstract**

19 Marine litter, which is composed mainly of plastics, is recognized as one of the most serious  
20 threats to marine ecosystems and a global environmental concern. Microplastics (MPs)  
21 densities were estimated in all environmental compartments: marine organisms are highly  
22 exposed to and ingest them, resulting in disruption of biological functions. Ecotoxicological  
23 approaches have also started elucidating the potential severity of MPs in controlled laboratory  
24 studies, but the commercially-available and pristine materials employed hardly reflect the  
25 actual composition of the environmental litter, which can be contaminated by chemical  
26 pollutants or biological agents. Building on the lack of research employing marine  
27 environmental MPs or microlitter as a whole, we characterized the quantity and quality of litter  
28 in the coastal epipelagic and in the digestive tract of two commercially-relevant fish species,  
29 and exposed primary cell cultures of mucosal and lymphoid organs to marine microlitter. A  
30 concentration of  $0.30 \pm 0.02$  microlitter items  $m^{-3}$  was found in the water column of the Northern  
31 Tyrrhenian sea.  $\mu$ FT-IR analysis revealed that particles of plastic origin, namely  
32 polypropylene, HDPE and polyamide, were present in 100% and 83.3% of *M. merluccius* and  
33 *M. barbatus* stomachs, respectively, which overall ingested  $14.67 \pm 4.10$  and  $5.50 \pm 1.97$   
34 items. Microlitter was confirmed as a vector of bacteria, fungi and flagellates. Lastly, and for  
35 the first time, the apical end-point of viability was significantly reduced in splenic cells exposed  
36 *in vitro* to two microlitter conditions. Considering the role of the spleen in the mounting of  
37 adaptive immune responses, our results warrant more in-depth investigations for clarifying the  
38 actual susceptibility of the biota to anthropogenic microlitter.

39

40 **Keywords**

41 Marine microlitter; Bioindicators; Cytotoxicity; *In vitro* approaches; Primary cell cultures;  
42 Biological agents

## 43 **Highlights**

- 44 ●  $0.30 \pm 0.02$  microlitter items  $m^{-3}$  was found in the coastal epipelagic Northern
- 45 Tyrrhenian sea
- 46 ●  $14.67 \pm 4.10$  and  $5.50 \pm 1.97$  items were retrieved from hake and mullet stomach
- 47 contents
- 48 ● A subsample of the ingested microlitter was of plastic origin
- 49 ● Microlitter was validated as a carrier of bacteria, fungi and flagellates
- 50 ● Splenic cells exposed to both microlitter conditions for 72 hours suffered cytotoxicity

51 **Figure/Table captions**

52 **Fig. 1** Map of sampling sites - Study area with indications of 250  $\mu\text{m}$  net tows site locations, haul route  
53 and bathymetry.

54 **Fig. 2** A-E Microlitter collected from water column - Some examples of microlitter particles collected  
55 from the water column by 250  $\mu\text{m}$  net tows (SUP1-SUP4).

56 **Fig. 3** Quali-quantitative characterization of anthropogenic litter collected from the water column - A)  
57 Particle density of the micro- and macrolitter fractions per net tow. Average litter density is reported as  
58 mean  $\pm$  SE. B) Cumulative microlitter density per type per net tow. C) Size class distribution per  
59 microlitter shape type. D-F) Percentage of color abundance per microlitter shape type.

60 **Fig. 4** Microlitter retrieved from the digestive tract of fish - A) White fragment from *M. barbatus*. B) Black  
61 filament from *M. merluccius*. C) Green fragment from *M. merluccius*.

62 **Fig. 5** Quali-quantitative characterization of microlitter retrieved from fish stomach contents - A)  
63 Microlitter particle abundance distribution per species (log y scale). Whiskers plotted according to the  
64 Tukey method. B) Cumulative particle abundance per type. C) Size class distribution per microlitter  
65 shape type per species. D-G) Percentage of color abundance per microlitter shape type per species.

66 **Fig. 6**  $\mu\text{FT-IR}$  spectra - Spectra of randomly selected representative samples of microlitter retrieved  
67 from fish stomach content. Matching with reference substance as per the Open Specy open source  
68 database. r: Pearson's correlation coefficient as measure of linear correlation between data sets.

69 **Fig. 7** A-D Microlitter as a vector of biological agents - Examples of microorganisms observed in cell  
70 suspensions following a 72-hour incubation period with microlitter. A) European hake splenic cell,  
71 negative control. B-D) Grey, white and black arrowheads indicate bacilliform bacteria, unicellular fungi  
72 and flagellates, respectively. Scale bar: 10  $\mu\text{m}$ .

73 **Fig. 8** Quantification of ATP levels as a proxy of cell viability - ATP data distribution per species, time,  
74 organ and treatment. Statistical significance as per one-way ANOVA followed by Tukey's HSD *post hoc*  
75 test. \*:  $p < 0.05$

76 **Fig. 9** Comparison of microlitter densities retrieved from representative scientific literature with data  
77 herein presented. Color-coded boxes indicate means  $\pm$  SD items  $\text{m}^{-3}$ .

78 **Table 1** Sampling details - Summary of the experimental campaign with hauls and net tows details.  
79 Time is expressed as UTC/GMT +2:00.

80 **Table 2** Full statistical details of the rank-based nonparametric Kruskal-Wallis tests performed on  
81 microbial counts per species and organ. ns: non significant.

82 **Table S1** Water column microlitter abundance and density (items m<sup>-3</sup>) per color per net tow.

83 **Table S2** Water column microlitter size classes per particle type per net tow.

84 **Table S3** Full statistical details of the one way ANOVA tests performed on cytotoxic data of A)  
85 *Merluccius merluccius* and B) *Mullus barbatus*, per time and organ. DFn: degrees of freedom in the  
86 numerator; DFd: degrees of freedom in the denominator; F: test statistic for ANOVA; ges: generalized  
87 eta squared.

## 88        **1. Introduction**

89 Coastal areas are subject to an exponential increase in population density and the  
90 development of impacting human activities, e.g. industries, tourism, recreational activities,  
91 fishing and aquaculture. As a consequence, they can be affected by both sporadic and  
92 continuous pollution events, with consequences on all compartments, and are thus considered  
93 “hotspots” of contamination (Cole et al., 2011).

94 Marine litter, defined as “any anthropogenic manufactured, or processed solid material  
95 (regardless of size) discarded, disposed of, or abandoned in the environment, including all  
96 materials discarded into the sea, on the shore, or brought indirectly to the sea by rivers,  
97 sewage, storm water, waves, or winds” (UNEP, 2016), is one of the most serious threats to  
98 marine ecosystems and a global environmental concern. It includes glass, metal, cardboard  
99 and textiles items (Löhr et al., 2017) as well as anthropogenic particles produced by industrial  
100 activities (e.g., coal-fired power plants) and transport emissions (Piazzolla et al., 2020) but  
101 Tekman et al. (2021) revealed that plastic accounts for the 66-79% of the global litter  
102 composition.

103 Annual global plastic production accounted for 348 million tonnes in 2018 (Association of  
104 Plastic Manufacturers, 2018): about 1.3-3.1% of these (5-12 million tonnes year<sup>-1</sup>) reach the  
105 Oceans (Jambeck et al., 2015), but the total amount of floating plastic was estimated at 0.3  
106 million tons (van Sebille et al., 2015). In addition to primary microplastics (MPs), i.e. particles  
107 that are purposefully manufactured of microscopic sizes < 5 mm, the vast majority of marine  
108 litter is subject to degradation by abiotic (UV radiation, mechanical abrasion, temperature) and  
109 biotic (microbiological depolymerization) agents, resulting into secondary MPs (Ru et al., 2020;  
110 Thompson et al., 2004). Their chemico-physical properties, such as type of polymer, density,  
111 size, shape, internal geometry and color, influence their transport, buoyancy and sinking as  
112 well as rates of ingestion and removal by aquatic organisms (Kowalski et al., 2016; Nguyen et  
113 al., 2020; Shim et al., 2018).

114 Due to their small size, MPs are bioavailable for a variety of taxa (e.g. Cole et al., 2013;  
115 Gomiero et al., 2018; Lusher et al., 2013; Pittura et al., 2018) and can either be mistaken with

116 or selectively chosen instead of food (Clark et al., 2016; Moore, 2008), with demonstrated  
117 impacts. Once ingested, MPs can affect biological functions and tissue integrity of marine  
118 organisms (Cole et al., 2015; Pedà et al., 2016; Sussarellu et al., 2016). Moreover, MPs can  
119 be potential carriers of pollutants (Amelia et al., 2021; Guo and Wang, 2019) and can be  
120 colonized by microbial pathogens, transferring them along the trophic web (Caruso, 2019;  
121 Casabianca et al., 2019). Due to its geographical and oceanographical features, the  
122 Mediterranean Sea is regarded as an accumulation zone for marine litter, with marine litter  
123 densities comparable to those of the five subtropical gyres (Cózar et al., 2015; UNEP/MAP,  
124 2015; Van Sebille et al., 2020).

125 Ecotoxicological and physiological impacts of MPs have not received as much attention and,  
126 to the best of our knowledge, no data exist about cytotoxic effects caused by field-collected  
127 MPs to cell cultures from fish mucosal and lymphoid organs. The aim of the present study was  
128 hence to characterize microlitter abundance in a coastal area of the Northern Tyrrhenian Sea  
129 (Italy) in the water column and in the digestive tracts of selected fish species, as well as to  
130 evaluate the biological contamination and the potential *in vitro* cytotoxicity of environmentally-  
131 collected microlitter particles on fish primary cell cultures. The European hake *Merluccius*  
132 *merluccius* (Linnaeus, 1758) and the red mullet *Mullus barbatus* (Linnaeus, 1758) were  
133 chosen as models based on biological features, commercial relevance, abundance in the  
134 sampling area and their suitability as small-scale plastic pollution bioindicators.

135 **2. Material & Methods**

136 **a. Study area**

137 The research was conducted in the Northern Tyrrhenian Sea (Italy), FAO's General Fisheries  
138 Commission for the Mediterranean (GFCM) Geographical Sub-Area 9 (GSA 9). The  
139 experimental campaign fell within the physiographical unit (PU) M. Argentario – Cape Linaro,  
140 and included the coastal platform that extends from Santa Severa (42.01676 N, 11.95604 E)  
141 to the Tarquinia coastal area (42.22243 N, 11.70495 E). More details about bathymetry and  
142 sediment type found in the study area can be found in Mancini et al. (2021).

143 **b. Experimental campaign**

144 The experimental campaign took place on October 23<sup>rd</sup> 2020 and extended over a 14-hour  
145 period (03:00 - 17:00 UTC/GMT +2:00). Four 3-hour long fishing hauls aimed at macrolitter  
146 sampling and four 15-minute long horizontal tows with a 250  $\mu\text{m}$  mesh size net aimed at  
147 microlitter sampling were performed at 102-115 m depth and sea surface, respectively (Fig.  
148 2). Table 1 reports time of start, coordinates and depth per each fishing haul and tow. Meteo-  
149 marine conditions are reported as per the World Meteorological Organization sea state coding.

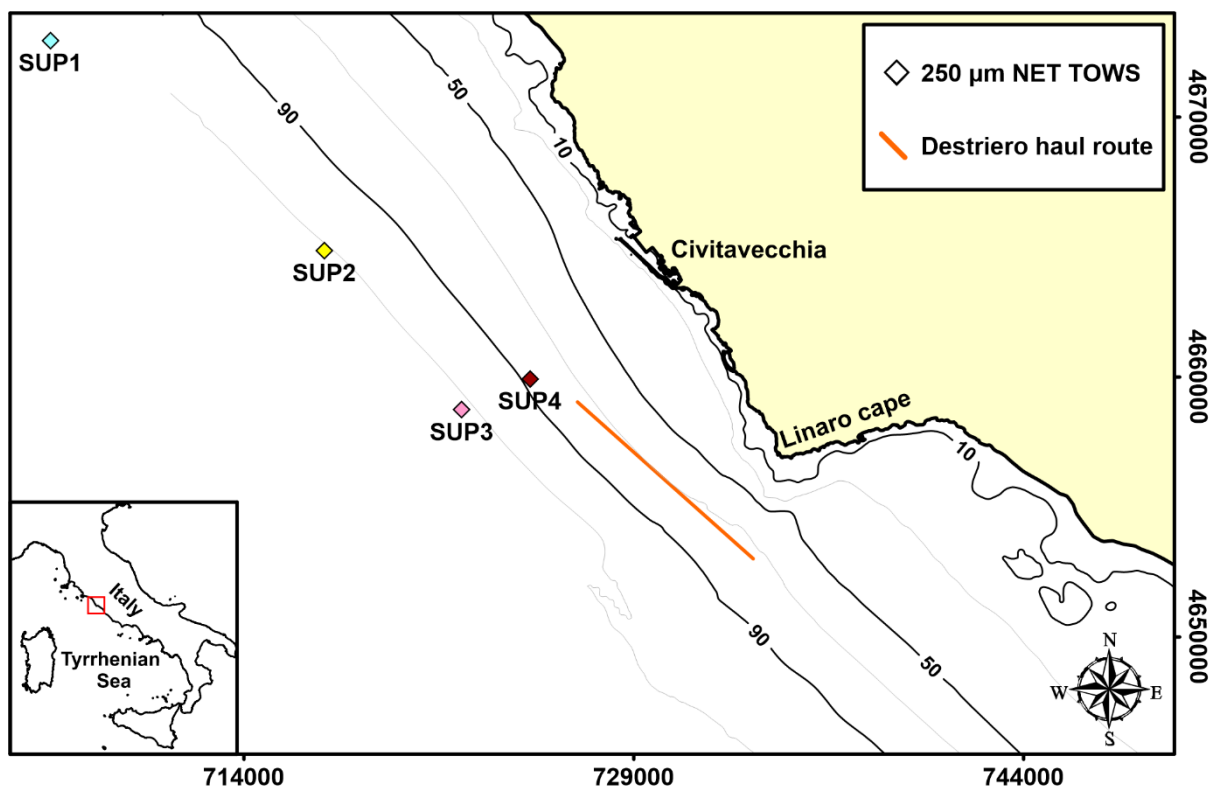

150

151 Fig. 1



152 **Table 1**

| Hauls      |                            |                            |             |           |                                                | 250 $\mu\text{m}$ net tows |                          |                           |                                               |                                               |                         |
|------------|----------------------------|----------------------------|-------------|-----------|------------------------------------------------|----------------------------|--------------------------|---------------------------|-----------------------------------------------|-----------------------------------------------|-------------------------|
| Start time | Start coordinates          | End coordinates            | Start depth | End depth | Macrolitter items $\text{Km}^2$ (>1, < 450 cm) | Start time (sample #)      | Start coordinates        | End coordinates           | Microlitter items $\text{m}^3$ (>0.25, <5 mm) | Macrolitter items $\text{m}^3$ (>0.5, < 6 cm) | Meteo-marine conditions |
| 04:50      | 42°05.690 N<br>11°38.785 E | 42°10.888 N<br>11°30.065 E | 105         | 114       | 400                                            | 07:35 (SUP1)               | 42°10.883N<br>11°30.070E | 42°10.570N<br>11°30.470E  | 0.29                                          | 0.008                                         | Calm (rippled)          |
| 08:00      | 42°10.480 N<br>11°30.704 E | 42°06.390 N<br>11°37.467 E | 110         | 102       | 312.5                                          | 11:15 (SUP2)               | 42°06.349N<br>11°37.538E | 42°05.789N<br>11°38.128E  | 0.23                                          | 0.01                                          | Smooth (wavelets)       |
| 12:10      | 42°07.135 N<br>11°35.469 E | 42°03.040 N<br>11°41.115 E | 115         | 105       | 363.64                                         | 14:05 (SUP3)               | 42°02.957N<br>11°41.231E | 42°02.4230N<br>11°41.919E | 0.32                                          | 0.013                                         | Smooth (wavelets)       |
| 14:26      | 42°02.761 N<br>11°41.678 E | 42°03.383 N<br>11°42.977 E | 108         | 110       | 2125                                           | 16:45 (SUP4)               | 42°03.554N<br>11°43.158E | 42°03.522N<br>11°43.884E  | 0.35                                          | 0.023                                         | Sligh                   |

153

154

**c. Qualitative and quantitative characterization of microlitter in the water**

155

**column**

156

The 250  $\mu\text{m}$  net was equipped with a metered line, a non-filtering cod-end and a flow meter.

157

Upon deployment, utmost care was taken to ensure the net stretched out correctly. Each tow

158

lasted for 15 minutes. Upon retrieval, the content of the net cod-end was transferred to 500 ml

159

containers and stored at 4 °C until transported to the laboratory. Each sample (SUP1- was

160

visually sorted 5 ml at a time using a stereomicroscope (Leica 8APO). Microlitter was classified

161

in terms of shape (i.e. filament, fragment, film), color and size (A: 250 < x < 500  $\mu\text{m}$ ; B: 500 <

162

x < 1000  $\mu\text{m}$ ; C: 1000 < x < 3000  $\mu\text{m}$ ; D: 3000 < x < 5000  $\mu\text{m}$ ; E: x > 5000  $\mu\text{m}$ ).

163

Microlitter abundances are presented as items  $\text{m}^{-3}$  of seawater  $\pm$  standard error (SE).

164

**d. Fish sampling**

165

Fish specimens were collected in the same fishing area (October 30<sup>th</sup> 2020, 01:11:00 PM haul

166

start time, start coordinates 41°59.669 N 11°49.214 E, end coordinates 42°03.0410 N

167

11°44.4621 E) by means of the bottom trawl net typically known as “volantina” geared with a

168

cod-end mesh size of 50 mm diamond and a vertical opening of 4 m (Sala et al., 2013). *M.*

169

*merluccius* and *M. barbatus* specimens were within the 17.3-20.2 cm and 10.5-12.7 cm total

170

length ranges, respectively: they were employed for the quali-quantitative characterization of

171

microlitter in stomach contents (n=6 per species) and for cytotoxicity assays (n=3 per species).

172

Immediately following the opening of the net, specimens of similar within-species sizes were

173

sorted and immediately transferred in ice and kept refrigerated until lab processing.

174

175 **e. Characterization of microlitter quantity and quality in fish stomach**

176 **contents**

177 In the laboratory, fish stomachs were sampled and preserved in 75% ethanol until processing.  
178 Stomach contents were then placed in a Petri dish and visually sorted using a  
179 stereomicroscope (Leica 8APO) to classify microlitter particles in terms of shape, size and  
180 color, using the same classification as in section 2c. The microlitter found in the stomach  
181 contents was maintained in 50 ml falcon tubes with 0.22  $\mu\text{m}$ -filtered water. Microlitter  
182 abundances are presented as mean particles per species  $\pm$  standard error (items  $\pm$  SE).

183 **f.  $\mu\text{FT-IR}$  analysis**

184 To classify the chemical composition of the microlitter retrieved from fish stomach contents, a  
185 representative subsample was analyzed by using Fourier-transform infrared  
186 microspectroscopy ( $\mu\text{FT-IR}$ ). The experiments were performed at the DAFNE Laboratory of  
187 INFN (Frascati, Italy) in transmission mode, using a Bruker Hyperion 3000 FTIR microscope  
188 equipped with a Globar IR source, a broadband beamsplitter (KBr) and a mercury-cadmium  
189 telluride (MCT) detector; the beam size was set at 20x20  $\mu\text{m}$ . Spectroscopic analysis yielded  
190 absorbance spectra, which were analysed by using the Open Specy open source database  
191 (Cowger et al., 2021) with the Pearson's correlation coefficient as measure of the linear  
192 correlation between the data sets. Spectra visualization and overlay were achieved with  
193 SpectraGryph v1.2 using the peak normalization method (i.e. each spectrum highest peak  
194 within the visible area was set to 1).

195 **g. Assessment of microlitter cytotoxic effects on fish primary cell cultures**

196 Marine microlitter obtained from the same sampling location of fish were stored in 50 ml falcon  
197 tubes in 0.22  $\mu\text{m}$ -filtered sea water until employed for cytotoxicity assays. They were dried,  
198 randomly selected and counted under a stereo microscope (average item weight 160  $\mu\text{g}$ ).  
199 Isolation and cultivation of fish primary cells were performed according to published standard  
200 procedure. Gills (G), head kidney (HK) and spleen (SPL) from *M. merluccius* and *M. barbatus*  
201 specimens (n=3) were removed and immersed in cold Hanks Balanced Salt Solution without  
202 calcium and magnesium (HBSS), previously adjusted for appropriate sea water osmolarity

203 (355 mOsm Kg<sup>-1</sup>) with 3M NaCl. Cells were obtained by pushing organs with a plastic pestle  
204 in cold HBSS through 100 and 40 µm nylon mesh strainers and washing by centrifugation (10  
205 min, 400 g, 4 °C. Subsequently, cells were resuspended in sterile L-15 (Leibovitz) medium  
206 containing 10% heat-inactivated fetal calf serum (FCS, Gibco) and antibiotics (penicillin–  
207 streptomycin, Gibco). Cells were counted in a Neubauer chamber and adjusted to a  
208 concentration of 5x10<sup>5</sup> cells ml<sup>-1</sup> in L-15 medium. Six hundred microliters of the cellular  
209 suspensions were cultured at 15°C and exposed to 4 and 20 field-collected microlitter  
210 particles, representing the “Low” and “High” conditions respectively, with the lowest microlitter  
211 concentration being in line with future modelled estimates (Isobe et al., 2019). Sterility was  
212 ensured in all microlitter and cell preparation phases by working under laminar flow cabinet.  
213 Cells were treated for 2 and 72 hours at 15°C with gentle rotary shaking to ensure a continuous  
214 contact with microlitter particles. Because the bottom trawl net was not equipped with any  
215 temperature sensor, the incubation temperature was selected according to the near real-time  
216 numerical model MEDSEA\_ANALYSISFORECAST\_PHY\_006\_013 (Clementi et al., 2021),  
217 resolving for variable “sea\_water\_potential\_temperature\_at\_sea\_floor (bottomT)” using  
218 sampling location, date and depth as input. A negative control consisting of cells incubated at  
219 same conditions without microlitter was tested. Three technical replicates per biological sample  
220 were used in all experimental groups. Intracellular ATP value, as a proxy of cell  
221 viability/cytotoxicity (Schoonen et al., 2005), was then quantitatively evaluated using the  
222 ATPlite assay (PerkinElmer) in 96 well plates following the manufacturer’s instructions: 50 µl  
223 of cell lysis and 50 µl substrate solutions were added to 100 µl cell suspensions per replicate  
224 and shaken for 5 min. Resulting homogenates were transferred to opaque well plates  
225 (OptiPlate-96, PerkinElmer) and luminescence was measured using a microplate reader  
226 (Wallac Victor2, PerkinElmer), following a 10-minute dark adaptation period.

#### 227 **h. Validation of microlitter as a carrier of biological agents**

228 Following a 72-hour incubation of primary cultures with microlitter following an alike  
229 experimental design as above, 10 µl of cell suspension from each experimental group was  
230 qualitatively observed under a Zeiss microscope equipped with a colour 8 video camera

231 (AxioCam MRC) and a software package (KS 300 and AxioVision). Multiple sets of  
232 photographs at random frames were taken per each experimental group and total counts of  
233 microorganisms were quantified over a 100.000  $\mu\text{m}^2$  area by an operator unaware of  
234 treatments.

#### 235 **i. Data analysis, visualization and statistics**

236 Stomach content particle abundance was tested for statistical significance between species  
237 using an independent samples t-test with the null hypothesis of equal population means  
238 between groups. Datasets were checked for normality and homoscedasticity. A log-  
239 transformation was applied to meet the normal distribution assumption.

240 The relation among species and ingestion of microlitter particle types by color was examined  
241 with a chi-square test on a two-way contingency table. The null hypothesis assumed no  
242 association between variables. Results are reported as  $\chi^2_{df}=\text{test statistic}$ .

243 Cytotoxicity data, grouped by species, time, organ and treatment, were tested for statistical  
244 significance using a one-way ANOVA with the null hypothesis of equal population means  
245 among groups, followed by a Tukey's HSD *post-hoc* test in case the main effect of the models  
246 was significant. Datasets were checked for normality and homoscedasticity.

247 Microbial count was analyzed with the rank-based nonparametric Kruskal-Wallis test because  
248 datasets, many of which were zero-inflated, did not meet the assumptions for parametric  
249 testing. The null hypothesis was that samples were drawn from the same population or from  
250 populations whose medians did not differ.

251 A comparison of microlitter densities retrieved from representative scientific literature was  
252 visualized as mean $\pm$ SD items  $\text{m}^{-3}$  with the R "forestplot" package v2.0.1. Data reported in other  
253 units than items  $\text{m}^{-3}$  was excluded from the analysis. Studies were organized hierarchically by  
254 location and year, and box size was set to constant.

#### 255 **j. Ethics statement**

256 Ethical review and approval was not required for this study because animals were sampled  
257 from the marine environment in strict compliance of the provisions of Directive 2010/63/EU on

258 the protection of animals used for scientific purposes, and were not subject to any  
259 experimental manipulation.

260 **3. Results**

261 **a. Qualitative and quantitative characterization of microlitter in the water**  
262 **column**

263 Anthropogenic marine litter mainly of plastic origin and in the form of filaments, fragments and  
264 films was found in all water samples taken in the Civitavecchia area, i.e. SUP1-SUP4 (Fig. 2,  
265 Table 1). Both microlitter ( $250 \mu\text{m} < x < 5 \text{ mm}$ ) and macrolitter ( $5 \text{ mm} < x < 6 \text{ cm}$ ) categories  
266 were identified.

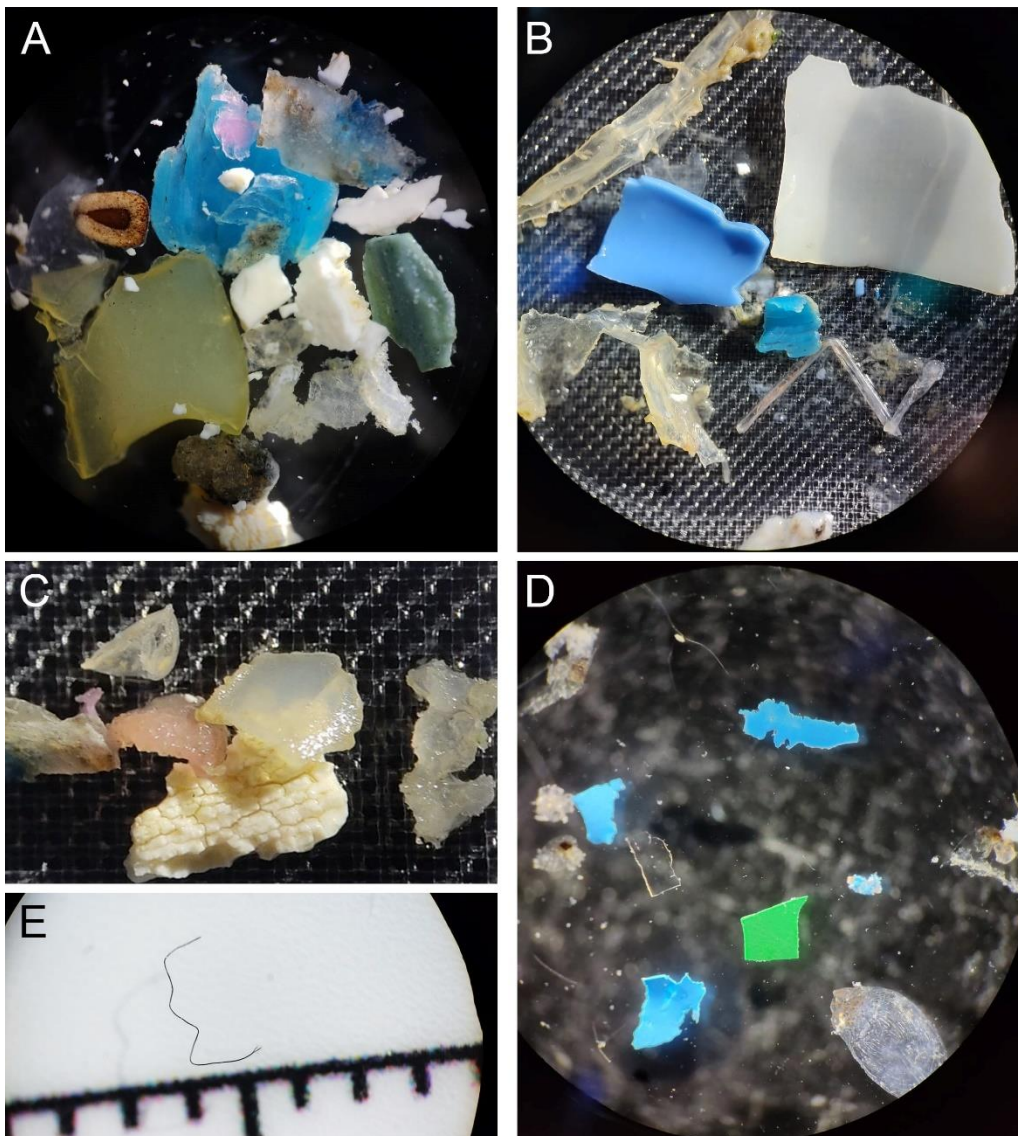

267

268 **Fig. 2**

269 SUP4 and SUP2 had the highest and lowest microlitter particle densities with 0.35 and 0.23  
 270 items  $m^{-3}$ , respectively (Table 1). SUP4 and SUP 1 had the highest and lowest macrolitter  
 271 particle densities with 0.023 and 0.008 items  $m^{-3}$ , respectively (Table 1). Their average  
 272 abundance among all samples was  $0.30 \pm 0.02$  items  $m^{-3}$  and  $0.014 \pm 0.003$  items  $m^{-3}$  (Fig.  
 273 3A).

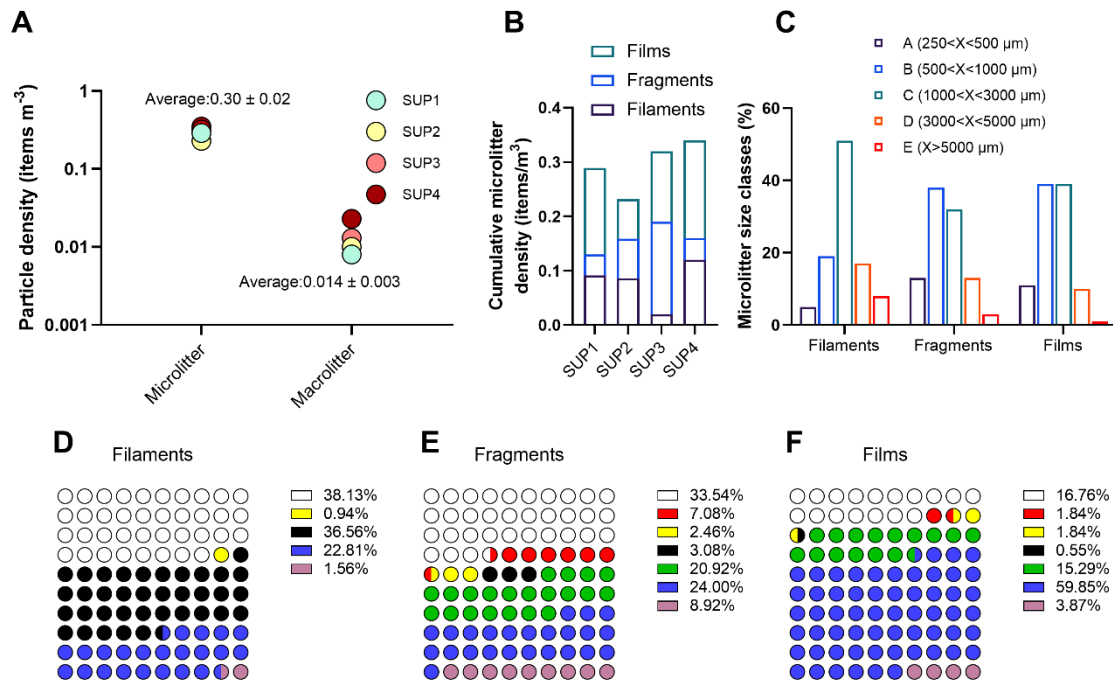

274

275 **Fig. 3**

276

277 All following data refer to the microlitter fraction. With regards to particle shape, filaments,  
 278 fragments and films were observed. In particular, the highest and lowest concentration of  
 279 filaments were found in SUP4 (0.12 items  $m^{-3}$ ) and SUP3 (0.02 items  $m^{-3}$ ), respectively; the  
 280 highest and lowest concentration of fragments were found in SUP3 (0.17 items  $m^{-3}$ ) and SUP1  
 281 (0.039 items  $m^{-3}$ ), and the highest and lowest concentration of films was found in SUP4 (0.18  
 282 items  $m^{-3}$ ) and SUP2 (0.07 items  $m^{-3}$ ) (Fig. 3B and Table S1).

283 The vast majority (51%) of filaments belonged to size class C and a smaller population (5%)  
 284 to size class A (5%). Fragments fell for the most part within size class B (38%), while size  
 285 class E was the least represented (3%). Films mostly belonged to size classes B and C (39%),  
 286 while size class E was found in the 1% of cases (Fig. 3C and Table S2).

287 Filaments from all tows were mostly white (38%) and black (37%); less frequent colors in terms  
288 of abundance were blue (23%) and yellow (1%). Fragments were more chromatically  
289 diversified: while most of them were white (34%), blue and green fragments were found with  
290 a percentage of 24% and 21%, respectively; red (7%), black (3%) and yellow (2%) fragments  
291 were less abundant. Films were mostly blue (60%), followed by white (17%) and green (15%);  
292 yellow (2%) and red (2%) films were less frequent (Fig. 3D-F and Table S1).

293 **b. Characterization of quantity, quality and chemical composition of**  
294 **microlitter in fish stomach content**

295 Microlitter particles were found in 100% *Merluccius merluccius* specimens and in 5 out of 6  
296 (83.3%) *Mullus barbatus* (Fig. 4).

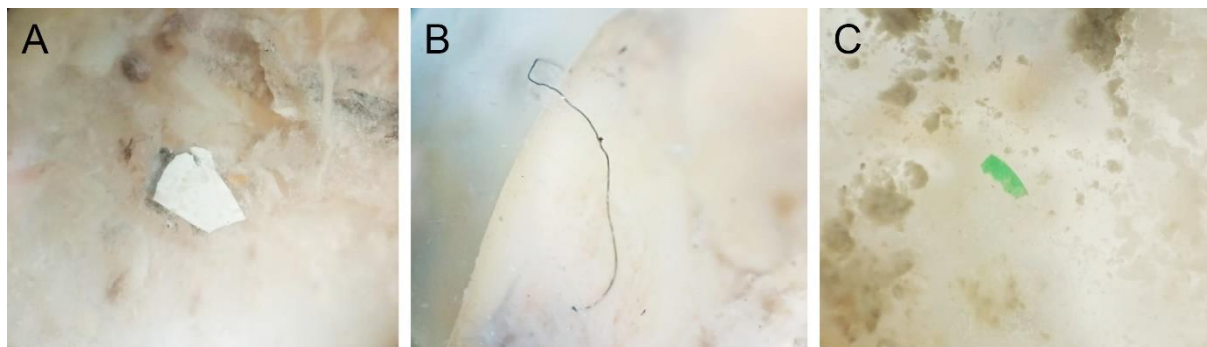

297  
298 **Fig. 4**

299  
300 A higher abundance of microlitter was found in the stomach contents of hake ( $14.67 \pm 4.10$   
301 items) than mullet ( $5.50 \pm 1.97$  items), but the difference between group means was not  
302 statistically significant ( $t_{10}=2.045$ ,  $p=0.068$ ) (Fig. 5A).



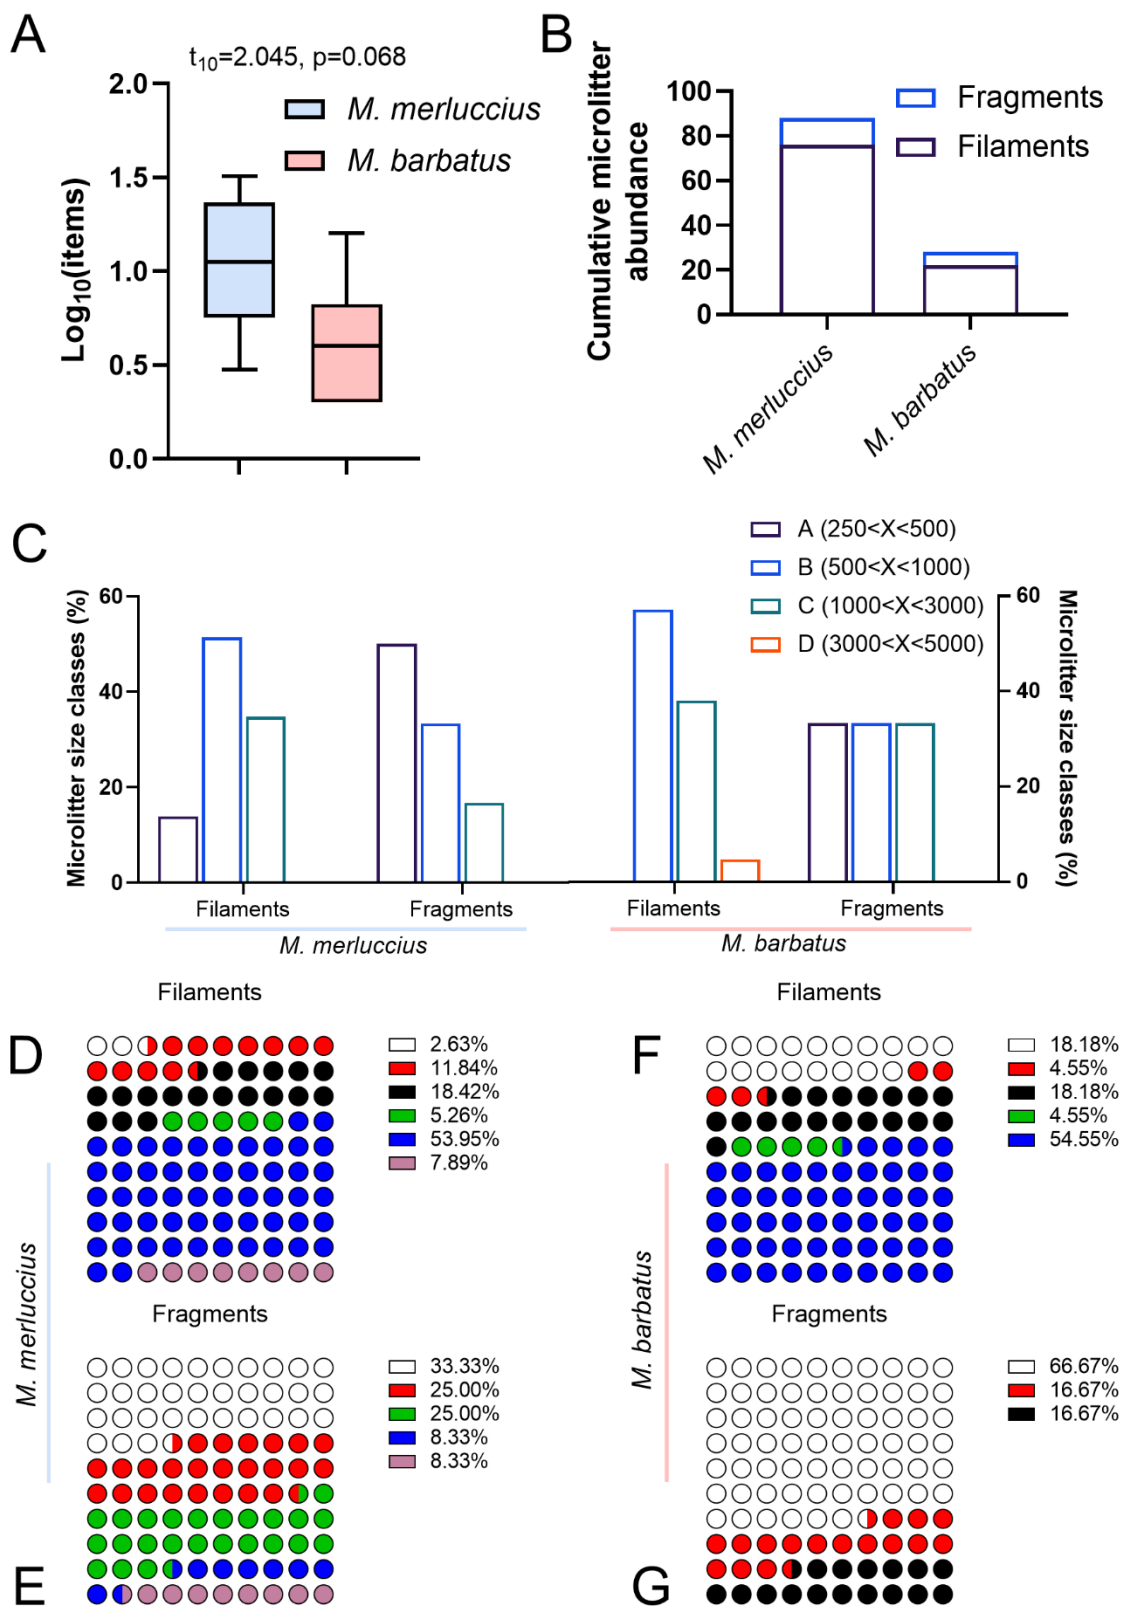

303

304 Fig. 5

305 The retrieved microlitter was classified as filaments and fragments, and no films were found.  
306 Filaments were the most abundant shape type, with 76/88 particles (83.36%) in hake and  
307 22/28 (78.57%) in mullet, respectively (Fig. 5B).  
308 *M. merluccius* ingested mostly filaments and fragments in the B and A size ranges,  
309 respectively. The most represented filament size class in *M. barbatus* stomach contents was  
310 B, while fragments were equally assigned to the three size classes (Fig. 5C).  
311 Filaments found in the stomach contents of *M. merluccius* were generally blue (53.95%) and  
312 black (18.42%) followed by red, green, white and other colored types (all below 12%). Blue,  
313 black and green filaments were found in similar percentages also in *M. barbatus* (54.55%,  
314 18.18% and 4.55%, respectively). Microlitter fragments in hake and mullet were mostly white  
315 (33% and 66.67%, respectively) and red (25% and 16.67%, respectively); however, green,  
316 blue and other colored-fragments were retrieved only from hake, while black fragments were  
317 only found in mullet (Fig. 5D-G). Differences in microlitter stomach content by color between  
318 species was not statistically significant either for filaments ( $X^2_{(5)}=9.38$ ,  $p=0.094$ ) or fragments  
319 ( $X^2_{(5)}=5.63$ ,  $p=0.34$ ).  
320 A representative subsample of item types found within stomach contents of both species was  
321 analyzed by  $\mu$ FT-IR. Particles of plastic origin, namely polypropylene, HDPE and polyamide  
322 (87%, 72% and 58% match with corresponding reference spectra, respectively), were  
323 identified (Fig. 6 A-C).

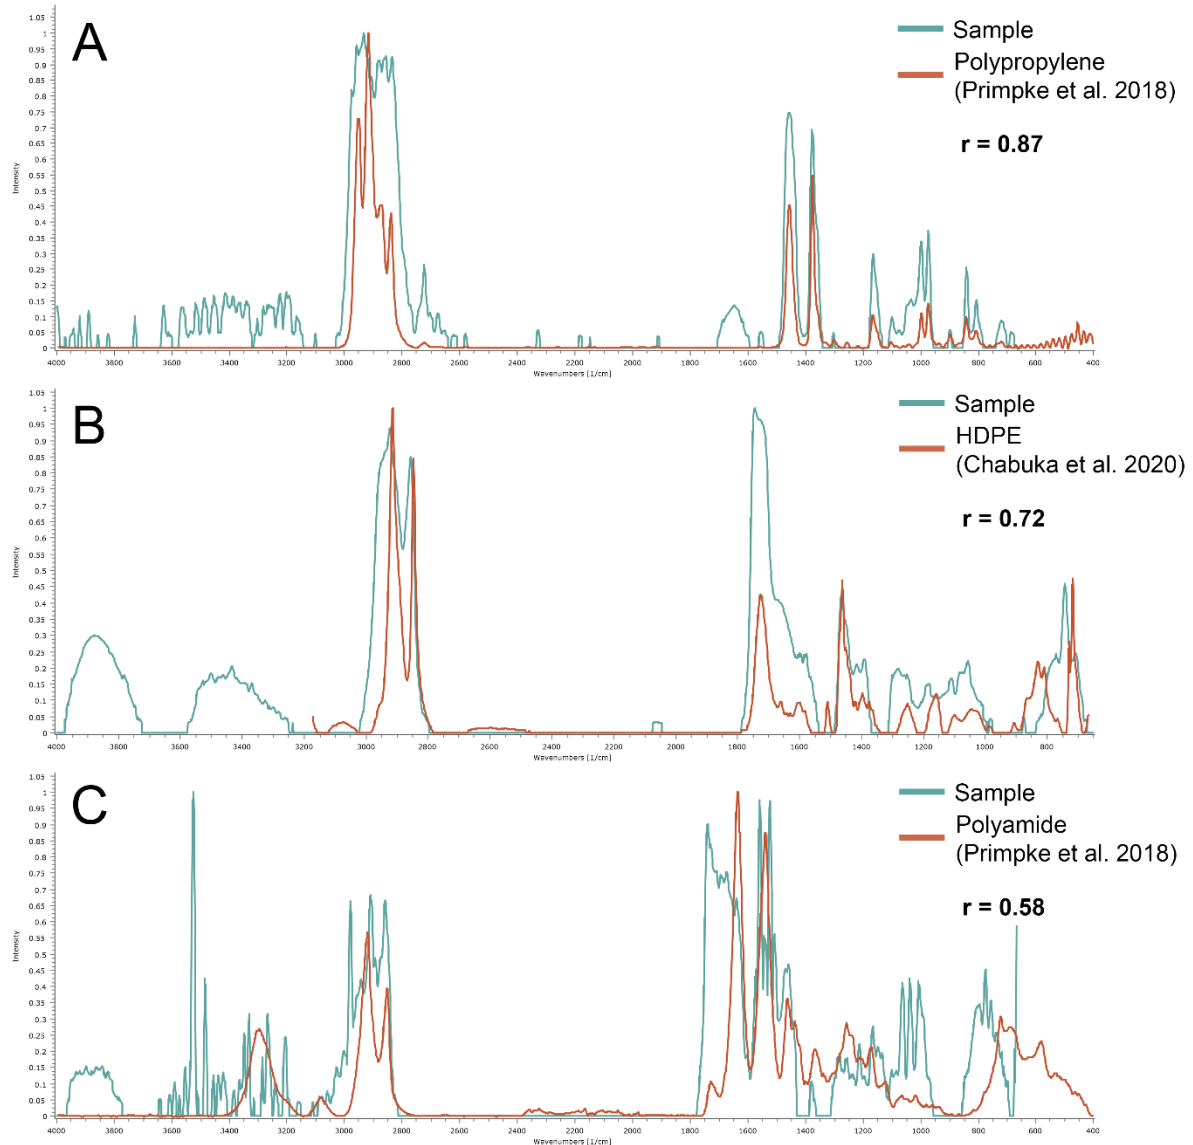

324

325 **Fig. 6**

326

327 **c. Microlitter as carrier of biological agents to *M. merluccius* and *M.***  
328 ***barbatus* cells**

329 To evaluate the presence of microorganisms and consequently validate the role of microlitter  
330 as carrier of biological agents, 10  $\mu$ l cell suspension from all cultures following a 72-hour  
331 incubation were qualitatively assessed by optical microscopy. Numerous bacilliform bacteria  
332 (grey arrowheads), unicellular fungi (white arrowheads) and flagellates (black arrowheads)  
333 were observed in microlitter-exposed samples (Fig. 7 B-D) but not in the controls (Fig. 7 A).

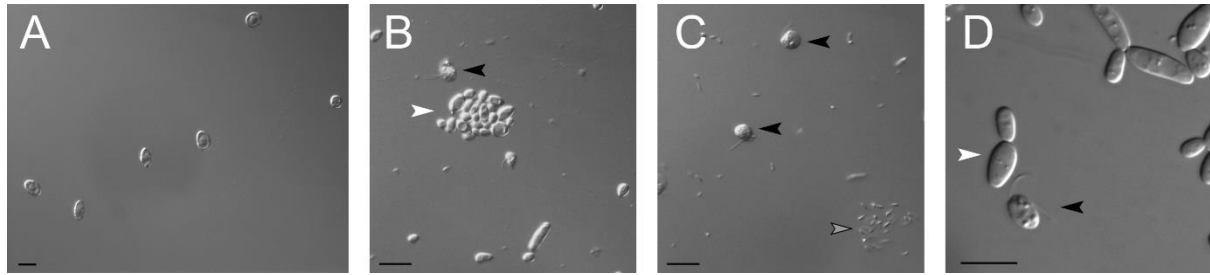

334

335 **Fig. 7**

336

337 Their abundance was quantified over a 37.000  $\mu\text{m}^2$  area and normalized to 100.000  $\mu\text{m}^2$  area  
 338 per species, organ and microlitter concentration. A variable degree of biological contamination  
 339 was found in conditioned primary cultures of both species (Table 2).

340 **Table 2**

| Species              | Organ       | Mean microbial count |      |       | SE microbial count |       |       | 95% CI microbial count [L;U] |              |              | Statistical test |       |    |
|----------------------|-------------|----------------------|------|-------|--------------------|-------|-------|------------------------------|--------------|--------------|------------------|-------|----|
|                      |             | ctrl                 | low  | high  | ctrl               | low   | high  | ctrl                         | low          | high         | H                | p     |    |
| <i>M. merluccius</i> | Gills       | 0                    | 269  | 241.2 | 0                  | 143.8 | 57.95 | 0;0                          | -349.8;887.8 | -8.14;490.5  | 5.609            | 0.068 | ns |
|                      | Head kidney | 0                    | 14.4 | 23.31 | 0                  | 7.00  | 3.91  | 0;0                          | -15.79;44.48 | 6.49;40.13   | 6.161            | 0.025 | *  |
|                      | Spleen      | 0                    | 8.07 | 48.42 | 0                  | 5.6   | 34.97 | 0;0                          | -16.02;32.16 | -102.0;198.9 | 5.162            | 0.1   | ns |
| <i>M. barbatus</i>   | Gills       | 0                    | 0    | 18.83 | 0                  | 0     | 4.11  | 0;0                          | 0;0          | 1.15;36.51   | 7.624            | 0.036 | *  |
|                      | Head kidney | 0                    | 0    | 17.04 | 0                  | 0     | 5.88  | 0;0                          | 0;0          | -8.26;42.34  | 7.624            | 0.036 | *  |
|                      | Spleen      | 0                    | 5.38 | 23.31 | 0                  | 5.38  | 13.92 | 0;0                          | -17.77;28.53 | -36.58;83.21 | 4.587            | 0.107 | ns |

341

342 For the hake, a significant effect of microlitter concentration on microbial counts was found  
 343 only in HK primary cultures (H statistics=6.16, p=0.025). For the mullet, statistical significance  
 344 was evidenced for microbial counts in G and HK (H statistics=7.62, p=0.036).

345 **d. Microlitter cytotoxicity in *M. merluccius* and *M. barbatus* cells**

346 Microlitter cytotoxicity was evaluated based on the viability of cells from G, HK and SPL  
 347 following a 2- and a 72-hour long incubation with two environment-sampled microlitter  
 348 concentrations (Fig. 8).

## *M. merluccius*

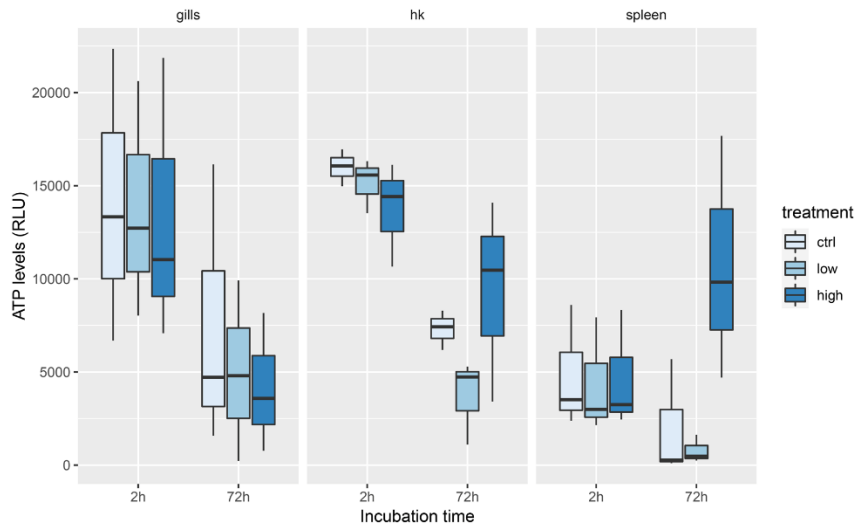

## *M. barbatus*

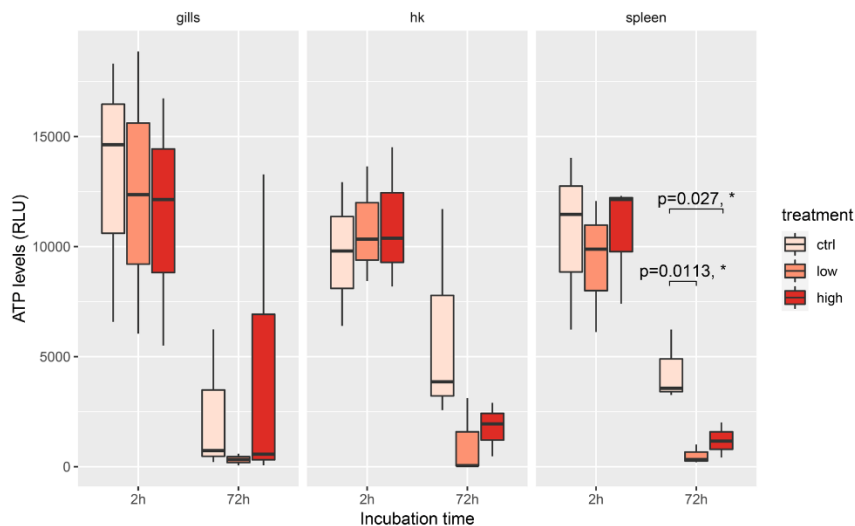

349

350 **Fig. 8**

351

352 Exposure to microlitter did not induce any statistically significant decrease in intracellular ATP  
353 following the short incubation time in either species or organ (Table S3a-b).

354 In *M. merluccius*, microlitter induced a decrease in median cell viability after a 72-hour  
355 incubation in primary G cultures at the high concentration and in both HK and SPL cultures at  
356 the low concentration. The linear model fit to splenic cell culture data following the 72-hour  
357 exposure explained the 62.3% of ATP levels variation, even though differences among  
358 experimental groups were slightly non-significant ( $p=0.054$ ) (Table S3a).

359 In *M. barbatus* primary cultures from all organs, the median intracellular ATP levels in the Low  
360 and High groups were lower than those of respective controls. Such a decrease revealed a

361 statistically significant main effect of microlitter concentration on splenic cells ( $F(2,6) = 10.8$ ,  $p$   
362  $=0.01$ ), with the overall treatment effect explaining almost 80% of ATP levels variation of the  
363 model ( $\eta^2 = 0.783$ ) (Table S3b). Pairwise comparisons between control and the “Low” and  
364 “High” groups were statistically significant ( $p$  adjusted = 0.0113 and 0.027, respectively) (Fig.  
365 8).

#### 366 4. Discussion

367 In this work we applied a multidisciplinary approach combining oceanographical,  
368 spectroscopical, cellular and microscopical methods to characterize the quality and quantity  
369 of microlitter particles in the coastal epipelagic water column and in the digestive tract of two  
370 commercially-valuable Mediterranean fish species; we also preliminarily addressed the  
371 cytotoxic potential of field-collected microlitter on primary cultures of cells extracted from  
372 mucosal (gills) and lymphoid (head kidney and spleen) organs.

373

374 The marine litter causes multiple environmental, economic, social, political and cultural  
375 impacts (Barboza et al., 2019; Galgani et al., 2019; GESAMP, 2015; UNEP, 2014), especially  
376 to the health and functioning of organisms and ecosystems (Corinaldesi et al., 2021; Garcia-  
377 Vazquez et al., 2018; Rios et al., 2007). At the European level, such pollutant was included  
378 among the 11 qualitative descriptors of the Marine Strategy Framework Directive upon which  
379 the quality of the marine environment is assessed (European Parliament, 2008/56/EC). Since  
380 2004, when the term microplastic was coined, extensive research has demonstrated the  
381 ubiquity of plastic pollution in several matrices such as beaches (Fortibuoni et al., 2021;  
382 Prevenios et al., 2018), sediments (Piazzolla et al., 2020; Renzi et al., 2018) and seawater  
383 (Atwood et al., 2019; Capriotti et al., 2021) - regardless of how remote they are (Cincinelli et  
384 al., 2017; Lusher et al., 2015). Microlitter was retrieved from all water samples taken within  
385 the framework of the PISCES project in a much higher (~20-fold) average concentration ( $0.30$   
386  $\pm 0.02$ ) than litter particles  $> 5$  mm ( $0.014 \pm 0.003$  items/m<sup>3</sup>). Keeping in mind the  
387 environmental and biological severity of litter  $< 5$  mm, our results are in good agreement with  
388 microlitter concentrations reported from other areas of the Mediterranean Sea, Yellow Sea  
389 and oceanic waters (Baini et al., 2018; Cincinelli et al., 2017; Collignon et al., 2012; Constant  
390 et al., 2018; Cózar et al., 2015; de Lucia et al., 2018, 2014; Expósito et al., 2021; Fagiano et  
391 al., 2022; Fossi et al., 2012, 2016; Kazour et al., 2019; Lusher et al., 2015; Panti et al., 2015;  
392 van der Hal et al., 2017; Zhang et al., 2017; Zhao et al., 2014) (Fig. 9), suggesting that even  
393 surveys that are not extensive in either duration or sample sizes can reliably capture the extent

394 of microlitter pollution. This is auspicious to minimize the impact of research-related  
 395 anthropogenic activities. An exception was represented by the Eastern Mediterranean Sea,  
 396 which appears to be much more polluted than the western basin. We must highlight that data  
 397 dispersion could not be quantified from Cózar et al. (2015) and Constant et al. (2018) as only  
 398 as mean items m<sup>-3</sup> were reported, and that data from Vasilopoulou et al. (2021) was discarded  
 399 because of non-informative results (41.31±112.05 mean±SD items m<sup>-3</sup> - SD could be back-  
 400 calculated from standard error because a sample size was clearly indicated by authors).

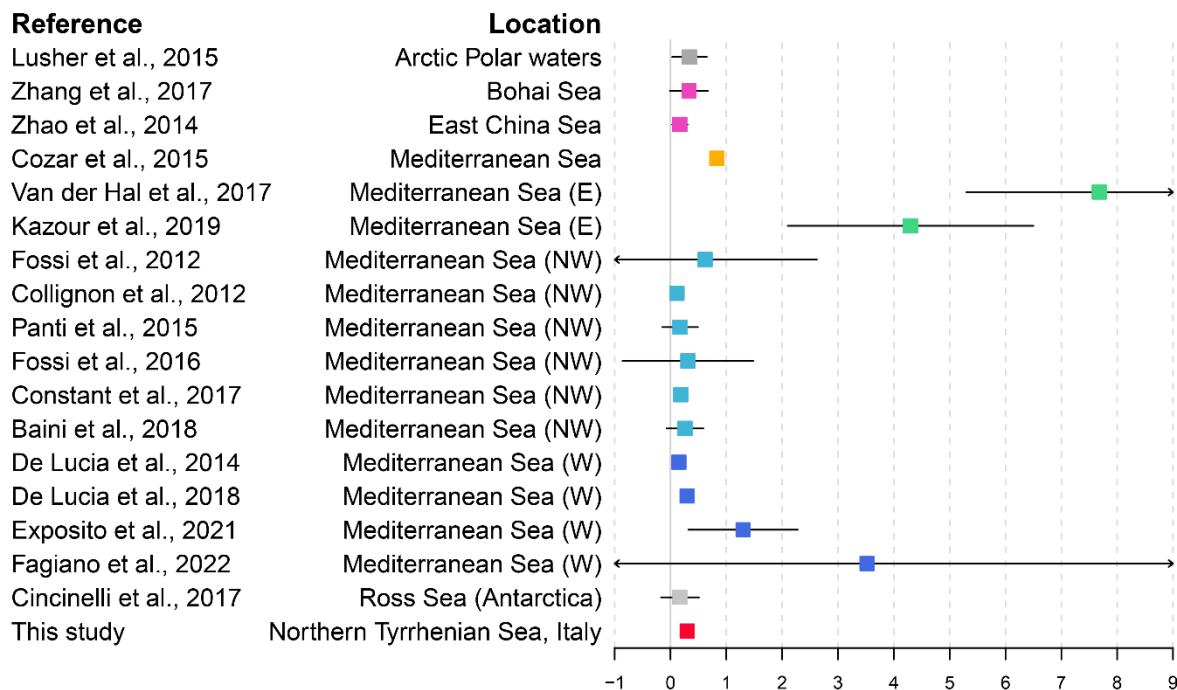

401

402 **Fig. 9**

403

404 The relationship between the marine biota and microlitter was so far mostly evaluated by  
 405 ingestion rates (e.g. Rios-Fuster et al., 2019; Savoca et al., 2019). Here we confirmed that  
 406 both our target species ingest plastic materials that range in size from 250 to 3000 µm and  
 407 are represented by polypropylene, high density polyethylene and polyamide items (Chabuka  
 408 and Kalivas, 2020; Primpke et al., 2018). Benthic macrolitter in the area was recently  
 409 described quali-quantitatively, and the most abundant categories were attributed to plastic  
 410 (Mancini et al., 2021). We call the attention on the fact that the same chemistry was also  
 411 demonstrated for items sampled from marine sediments (Piazzolla et al., 2020) and in the



412 atmosphere (Lucci et al., 2021) of the same area, pointing to the high and pervasive dispersion  
413 of anthropogenic litter in multiple environmental compartments.

414

415 MPs are thought to be mistaken for or even purposefully chosen instead of food (Clark et al.,  
416 2016; Ling et al., 2017) probably also depending on their color (Du et al., 2021; Wright et al.,  
417 2013). The presence of both shape types in the stomach of *M. merluccius* and *M. barbatus*  
418 and the lack of statistically significant differences based on the chromatic factor support the  
419 idea that microlitter may be ingested non-selectively by these two species, even though a  
420 biomagnification origin cannot be excluded. Hake and mullet were chosen as experimental  
421 models for a variety of reasons: on one hand they are among the most targeted demersal fish  
422 species by the Mediterranean deep-sea fisheries and the two most fished target species in  
423 the shallow area of the coastal sector (Sabatella et al., 2017; Tiralongo et al., 2021); on the  
424 other, they are regarded as bioindicators in coastal marine ecosystems and display a benthic  
425 feeding behavior in part of (juvenile *M. merluccius*) or throughout their lifespan (*M. barbatus*)  
426 (Carrozzi et al., 2019; Esposito et al., 2014). Moreover, some authors already described the  
427 occurrence of MPs in these two species (Atamanalp et al., 2021; Avio et al., 2015; Bellas et  
428 al., 2016; Digka et al., 2018; Giani et al., 2019; Mancuso et al., 2019) and MPs were  
429 demonstrated to abound in superficial sediments in the study area (Piazzolla et al., 2020).

430

431 A lower number of studies aimed at also elucidating physiological impacts exposed fish to  
432 pristine commercially-available MPs under controlled laboratory conditions. Their  
433 bioavailability was demonstrated and effects such as altered feeding behaviour, metabolic  
434 disorders, energy depletion, growth impairment, delayed development, compromised immune  
435 response, reproduction and lifespan were reported (Botterell et al., 2019; Espinosa et al.,  
436 2019, 2017; Guerrero et al., 2021; Mazurais et al., 2015; Rios-Fuster et al., 2021; Sendra et  
437 al., 2021; Yong et al., 2020).

438 Recently, beach-sampled microlitter was employed in *in vivo* experiments on the European  
439 sea bass *Dicentrarchus labrax* (Zitouni et al., 2021) and medaka *Oryzias latipes* (Pannetier et

440 al., 2020) to investigate survival, development, uptake, oxidative stress and genotoxicity  
441 following the administration of a microlitter-spiked feed. Their results showed the ability of  
442 environmental microplastics to i) accumulate in fish organs, ii) significantly affect the activity  
443 of enzymes involved in the antioxidant defense system and iii) induce DNA damages following  
444 acute exposures. HK primary cultures were also employed to define the impacts of non-  
445 environmental MPs on the abundance and antibody response of B lineage cells in rainbow  
446 trout (Zwollo et al., 2021): a lower rate of B cell development together with reduced expression  
447 of Ig heavy chain genes were found, suggesting that not only innate but also adaptive immunity  
448 may be threatened by MPs.

449 Despite some similarities with the three just-mentioned studies may be perceived, we must  
450 highlight that no other research had ever investigated the apical cytotoxic event in primary cell  
451 cultures derived from select fish mucosal and lymphoid organs following their exposure to  
452 microlitter that had been collected in the same water column from where animals originated  
453 (search conducted on Web of Science on October 24, 2021). We believe that our results,  
454 obtained in an attempt to bridge the fields of biological oceanography and experimental  
455 toxicology, are biologically significant because i) microlitter particles and fish specimens  
456 originated from the same sampling site, ii) microlitter cytotoxicity was measured by the well-  
457 established and unambiguous direct luciferase-based quantification of cellular ATP (Cree and  
458 Andreotti, 1997; Mahto et al., 2010) iii) primary cultures were obtained from organs that are  
459 critical for ensuring immune barrier and competency and iv) the strategy suitability for testing  
460 for MP toxicity was overall demonstrated and recently reviewed in details (Revel et al., 2021).  
461 In addition, fish have been increasingly established as experimental models in the fields of  
462 biomedical sciences and toxicology because they share many similarities with higher  
463 vertebrates immunology-wise (Miccoli et al., 2021; Scapigliati et al., 2018).

464

465 It was known that MPs are a carrier of biological agents (Amaral-Zettler, 2019; Kiessling et al.,  
466 2015), and our data confirm this. Because a dedicated experiment aimed at molecular  
467 taxonomy could not be set up due to limited microlitter availability, flagellates were attempted

468 a classification on phenotypic properties. Based on flagellar features and because they are  
469 extremely common in marine plankton, where they can be found free-swimming or attached  
470 to bacterial mats or other surfaces, we suggest that flagellates belong to *Paraphysomonas*  
471 sp., *Spumella* sp. or aloricate Bicosoecida. The fate of MPs in the water column and sediments  
472 can be influenced by microbes (Rogers et al., 2020). Once the microlitter is ingested, its  
473 associated microorganisms may colonize the gastrointestinal tract of the host, possibly  
474 affecting its welfare: in fact, harmful microorganisms, including potential human and animal  
475 pathogens, were found associated to litter (Zettler et al., 2013) and, according to Zwollo et al.  
476 (2021), serious consequences may arise due to the reduced ability to respond adequately to  
477 pathogens because of suboptimal humoral immune responses.

478

479 Taking into account cytotoxicity data (Fig. 8) and the lack of statistically different microbial  
480 counts observed in *M. barbatus* spleen cultures (Table 2), splenic cell subpopulations  
481 appeared to be the most sensitive to microlitter exposures among all investigated organs. No  
482 further reduction in ATP levels were seen in the High compared to the Low condition,  
483 suggesting that such a pollutant can impact cell viability also at low concentrations that are in  
484 line with modelled estimates over the next three decades. These results are concerning  
485 because spleen, together with thymus and kidney, is the major lymphoid organ of teleosts  
486 where adaptive immune responses are generated (Flajnik, 2018; Zapata et al., 2006). It is  
487 important to highlight that neither the physiological endpoints reported in the large majority of  
488 scientific literature nor our results herein presented provide insight into the molecular  
489 mechanisms underlying microlitter toxicity pathways; rather, they inform about apical events  
490 manifested either by the whole organism or primary cell cultures, respectively. However, the  
491 novelty of our approach was to provide data on a lower, possibly more predictive, level of  
492 biological organization (cellular vs. organismal) by means of so-called New Approach  
493 Methodologies, which heavily rely on *in vitro* testing. This is compliant with the 3Rs principle  
494 in animal testing in addition to having been validated by the latest internationally-agreed test

495 guidelines (OECD, 2021) and supported by regulatory toxicology roadmaps (e.g. [EPA's](#)  
496 [strategic vision](#)).

497

## 498 **5. Conclusion**

499 In conclusion, the present study has characterized the anthropogenic litter in the coastal  
500 epipelagic Northern Tyrrhenian Sea and the digestive tract of commercially-relevant fish  
501 species, validated the microliter fraction as a carrier of biological agents and, for the first time,  
502 demonstrated that splenic cell viability is negatively affected following exposure to such a  
503 contaminant. Future investigations with larger sample sizes, cell cultures from additional  
504 organs, either primary or continuous, and more in-depth methodological approaches are  
505 warranted for clarifying possible differences in susceptibility of the biota to anthropogenic  
506 microliter.

507        **6. Author contribution**

508        AM: Conceptualization, Funding acquisition, Data curation, Formal analysis, Visualization,  
509        Supervision, Project administration, Writing - original draft, Writing - review.

510        EM: Conceptualization, Funding acquisition, Investigation, Writing - Review & Editing.

511        PRS: Methodology, Investigation, Writing - original draft, Writing - Review & Editing.

512        GDV: Methodology, Resources, Writing - Review & Editing.

513        GS: Resources, Supervision, Writing - Review & Editing.

514        SP: Supervision, Writing - Review & Editing

515

516        **7. Acknowledgements**

517        This research was funded by the “PISCES” project (FEAMP PO 2014–2020 promoted by  
518        Lazio Region, Italy) and the “Departments of Excellence-2018” Program (Dipartimenti di  
519        Eccellenza) of the Italian Ministry of Education, University and Research awarded to the  
520        DIBAF Department of University of Tuscia. AM and EM are extremely thankful to the “Marinai  
521        & Caratisti” Cooperative of Civitavecchia and to Dr. Roberto Arciprete for their support in all  
522        sampling operations. Financial support to GDV was provided by the Grant to Department of  
523        Science, Roma Tre University (MIUR-Italy Dipartimenti di Eccellenza, ARTICOLO 1, COMMI  
524        314-337 LEGGE 232/2016). Dr. Daniele Piazzolla of the Laboratory of Experimental  
525        Oceanology and Marine Ecology (University of Tuscia) is acknowledged for his contribution to  
526        the PISCES project. AM wishes to thank Prof. Pierangelo Luporini (University of Camerino)  
527        for his invaluable input on flagellate taxonomy.

## 528 8. References

- 529 Amaral-Zettler, L., 2019. Plastics: Colonization and Degradation, in: Reference Module in Life Sciences. Elsevier. doi:10.1016/B978-0-12-809633-  
530 8.90685-X
- 531 Amelia, T.S.M., Khalik, W.M.A.W.M., Ong, M.C., Shao, Y.T., Pan, H.-J., Bhubalan, K., 2021. Marine microplastics as vectors of major ocean  
532 pollutants and its hazards to the marine ecosystem and humans. *Prog. Earth Planet. Sci.* 8, 12. doi:10.1186/s40645-020-00405-4
- 533 Association of Plastic Manufacturers, 2018. Plastics - the Facts 2018 - An analysis of European plastics production, demand and waste data.
- 534 Atamanalp, M., Köktürk, M., Uçar, A., Duyar, H.A., Özdemir, S., Parlak, V., Esenbuğa, N., Alak, G., 2021. Microplastics in Tissues (Brain, Gill,  
535 Muscle and Gastrointestinal) of *Mullus barbatus* and *Alosa immaculata*. *Arch. Environ. Contam. Toxicol.* 81, 460–469.  
536 doi:10.1007/s00244-021-00885-5
- 537 Atwood, E.C., Falcieri, F.M., Piehl, S., Bochow, M., Matthies, M., Franke, J., Carniel, S., Sclavo, M., Laforsch, C., Siegert, F., 2019. Coastal  
538 accumulation of microplastic particles emitted from the Po River, Northern Italy: Comparing remote sensing and hydrodynamic modelling  
539 with in situ sample collections. *Mar. Pollut. Bull.* 138, 561–574. doi:10.1016/j.marpolbul.2018.11.045
- 540 Avio, C.G., Gorbi, S., Regoli, F., 2015. Experimental development of a new protocol for extraction and characterization of microplastics in fish  
541 tissues: First observations in commercial species from Adriatic Sea. *Mar. Environ. Res.* 111, 18–26. doi:10.1016/j.marenvres.2015.06.014
- 542 Bains, M., Fossi, M.C., Galli, M., Caliani, I., Campani, T., Finio, M.G., Panti, C., 2018. Abundance and characterization of microplastics in the  
543 coastal waters of Tuscany (Italy): The application of the MSFD monitoring protocol in the Mediterranean Sea. *Mar. Pollut. Bull.* 133, 543–  
544 552. doi:10.1016/J.MARPOLBUL.2018.06.016
- 545 Barboza, L.G.A., Cózar, A., Gimenez, B.C.G., Barros, T.L., Kershaw, P.J., Guilhermino, L., 2019. Macroplastics Pollution in the Marine  
546 Environment, in: Shepperd, C. (Ed.), *World Seas: An Environmental Evaluation*. Elsevier, pp. 305–328. doi:10.1016/B978-0-12-805052-  
547 1.00019-X
- 548 Bellas, J., Martínez-Armentál, J., Martínez-Cámara, A., Besada, V., Martínez-Gómez, C., 2016. Ingestion of microplastics by demersal fish from  
549 the Spanish Atlantic and Mediterranean coasts. *Mar. Pollut. Bull.* 109, 55–60. doi:10.1016/j.marpolbul.2016.06.026
- 550 Botterell, Z.L.R., Beaumont, N., Dorrington, T., Steinke, M., Thompson, R.C., Lindeque, P.K., 2019. Bioavailability and effects of microplastics on  
551 marine zooplankton: A review. *Environ. Pollut.* 245, 98–110. doi:10.1016/j.envpol.2018.10.065
- 552 Capriotti, M., Cocci, P., Bracchetti, L., Cottone, E., Scandiffo, R., Caprioli, G., Sagratini, G., Mosconi, G., Bovolin, P., Palermo, F.A., 2021.  
553 Microplastics and their associated organic pollutants from the coastal waters of the central Adriatic Sea (Italy): Investigation of adipogenic  
554 effects in vitro. *Chemosphere* 263, 128090. doi:10.1016/j.chemosphere.2020.128090
- 555 Carrozzì, V., Di Lorenzo, M., Massi, D., Titone, A., Ardizzone, G., Colloca, F., 2019. Prey preferences and ontogenetic diet shift of European hake  
556 *Merluccius merluccius* (Linnaeus, 1758) in the central Mediterranean Sea. *Reg. Stud. Mar. Sci.* 25, 100440.  
557 doi:10.1016/j.rsma.2018.100440
- 558 Caruso, G., 2019. Microplastics as vectors of contaminants. *Mar. Pollut. Bull.* 146, 921–924. doi:10.1016/j.marpolbul.2019.07.052
- 559 Casabianca, S., Capellacci, S., Giacobbe, M.G., Dell'Aversano, C., Tartaglione, L., Varriale, F., Narizzano, R., Risso, F., Moretto, P., Dagnino, A.,  
560 Bertolotto, R., Barbone, E., Ungaro, N., Penna, A., 2019. Plastic-associated harmful microalgal assemblages in marine environment.  
561 *Environ. Pollut.* 244, 617–626. doi:10.1016/j.envpol.2018.09.110
- 562 Chabuka, B.K., Kalivas, J.H., 2020. Application of a Hybrid Fusion Classification Process for Identification of Microplastics Based on Fourier  
563 Transform Infrared Spectroscopy. *Appl. Spectrosc.* 74, 1167–1183. doi:10.1177/0003702820923993
- 564 Cincinelli, A., Scopetani, C., Chelazzi, D., Lombardini, E., Martellini, T., Katsoyiannis, A., Fossi, M.C., Corsolini, S., 2017. Microplastic in the  
565 surface waters of the Ross Sea (Antarctica): Occurrence, distribution and characterization by FTIR. *Chemosphere* 175, 391–400.  
566 doi:10.1016/j.chemosphere.2017.02.024
- 567 Clark, J.R., Cole, M., Lindeque, P.K., Fileman, E., Blackford, J., Lewis, C., Lenton, T.M., Galloway, T.S., 2016. Marine microplastic debris: a  
568 targeted plan for understanding and quantifying interactions with marine life. *Front. Ecol. Environ.* 14, 317–324. doi:10.1002/fee.1297
- 569 Clementi, E., Aydogdu, A., Goglio, A.C., Pistoia, J., Escudier, R., Drudi, M., Grandi, A., Mariani, A., Lyubartsev, V., Lecci, R., Cretí, S., Coppini,  
570 G., Masina, S., Pinardi, N., 2021. Mediterranean Sea Physical Analysis and Forecast (CMEMS MED-Currents, EAS6 system) (Version 1)

- 571 [Data set]. Copernicus Monitoring Environment Marine Service (CMEMS).  
572 doi:10.25423/CMCC/MEDSEA\_ANALYSISFORECAST\_PHY\_006\_013\_EAS6
- 573 Cole, M., Lindeque, P., Fileman, E., Halsband, C., Galloway, T.S., 2015. The Impact of Polystyrene Microplastics on Feeding, Function and  
574 Fecundity in the Marine Copepod *Calanus helgolandicus*. *Environ. Sci. Technol.* 49, 1130–1137. doi:10.1021/es504525u
- 575 Cole, M., Lindeque, P., Fileman, E., Halsband, C., Goodhead, R., Moger, J., Galloway, T.S., 2013. Microplastic Ingestion by Zooplankton.  
576 *Environ. Sci. Technol.* 47, 6646–6655. doi:10.1021/es400663f
- 577 Cole, M., Lindeque, P., Halsband, C., Galloway, T.S., 2011. Microplastics as contaminants in the marine environment: A review. *Mar. Pollut. Bull.*  
578 62, 2588–2597. doi:10.1016/j.marpolbul.2011.09.025
- 579 Collignon, A., Hecq, J.H., Glagani, F., Voisin, P., Collard, F., Goffart, A., 2012. Neustonic microplastic and zooplankton in the North Western  
580 Mediterranean Sea. *Mar. Pollut. Bull.* doi:10.1016/j.marpolbul.2012.01.011
- 581 Constant, M., Kerherve, P., Sola, J., Sanchez-Vidal, A., Canals, M., Heussner, S., 2018. Floating Microplastics in the Northwestern Mediterranean  
582 Sea: Temporal and Spatial Heterogeneities, in: M., C., Di Pace, E., Errico, M., Gentile, G., Montarsolo, A., Mossotti, R. (Eds.),  
583 Proceedings of the International Conference on Microplastic Pollution in the Mediterranean Sea. pp. 9–15. doi:10.1007/978-3-319-71279-  
584 6\_2
- 585 Corinaldesi, C., Canensi, S., Dell'Anno, A., Tangherlini, M., Di Capua, I., Varrella, S., Willis, T.J., Cerrano, C., Danovaro, R., 2021. Multiple  
586 impacts of microplastics can threaten marine habitat-forming species. *Commun. Biol.* 4, 1–13. doi:10.1038/s42003-021-01961-1
- 587 Cowger, W., Steinmetz, Z., Gray, A., Munno, K., Lynch, J., Hapich, H., Primpke, S., De Frond, H., Rochman, C., Herodotou, O., 2021.  
588 Microplastic Spectral Classification Needs an Open Source Community: Open Specy to the Rescue! *Anal. Chem.* 93, 7543–7548.  
589 doi:10.1021/acs.analchem.1c00123
- 590 Cózar, A., Sanz-Martín, M., Martí, E., González-Gordillo, J.I., Ubeda, B., Gálvez, J.Á., Irigoien, X., Duarte, C.M., 2015. Plastic Accumulation in the  
591 Mediterranean Sea. *PLoS One* 10, e0121762. doi:10.1371/journal.pone.0121762
- 592 Cree, I.A., Andreotti, P.E., 1997. Measurement of cytotoxicity by ATP-based luminescence assay in primary cell cultures and cell lines. *Toxicol.*  
593 *Vitr.* 11, 553–556. doi:10.1016/S0887-2333(97)00060-X
- 594 de Lucia, G.A., Caliani, I., Marra, S., Camedda, A., Coppa, S., Alcaro, L., Campani, T., Giannetti, M., Coppola, D., Cicero, A.M., Panti, C., Bainsi,  
595 M., Guerranti, C., Marsili, L., Massaro, G., Fossi, M.C., Matiddi, M., 2014. Amount and distribution of neustonic micro-plastic off the  
596 western Sardinian coast (Central-Western Mediterranean Sea). *Mar. Environ. Res.* 100, 10–16. doi:10.1016/j.marenvres.2014.03.017
- 597 de Lucia, G.A., Vianello, A., Camedda, A., Vani, D., Tomassetti, P., Coppa, S., Palazzo, L., Amici, M., Romanelli, G., Zampetti, G., Cicero, A.M.,  
598 Carpentieri, S., Di Vito, S., Matiddi, M., 2018. Sea water contamination in the Vicinity of the Italian minor islands caused by microplastic  
599 pollution. *Water (Switzerland)* 10. doi:10.3390/w10081108
- 600 Digka, N., Tsangaris, C., Torre, M., Anastasopoulou, A., Zeri, C., 2018. Microplastics in mussels and fish from the Northern Ionian Sea. *Mar.*  
601 *Pollut. Bull.* 135, 30–40. doi:10.1016/j.marpolbul.2018.06.063
- 602 Du, S., Zhu, R., Cai, Y., Xu, N., Yap, P.-S., Zhang, Yunhai, He, Y., Zhang, Yongjun, 2021. Environmental fate and impacts of microplastics in  
603 aquatic ecosystems: a review. *RSC Adv.* 11, 15762–15784. doi:10.1039/D1RA00880C
- 604 Espinosa, C., Cuesta, A., Esteban, M.Á., 2017. Effects of dietary polyvinylchloride microparticles on general health, immune status and  
605 expression of several genes related to stress in gilthead seabream (*Sparus aurata* L.). *Fish Shellfish Immunol.* 68, 251–259.  
606 doi:10.1016/j.fsi.2017.07.006
- 607 Espinosa, C., Esteban, M.Á., Cuesta, A., 2019. Dietary administration of PVC and PE microplastics produces histological damage, oxidative  
608 stress and immunoregulation in European sea bass (*Dicentrarchus labrax* L.). *Fish Shellfish Immunol.* 95, 574–583.  
609 doi:10.1016/j.fsi.2019.10.072
- 610 Esposito, V., Andaloro, F., Bianca, D., Natalotto, A., Romeo, T., Scotti, G., Castriota, L., 2014. Diet and prey selectivity of the red mullet, *Mullus*  
611 *barbatus* (Pisces: Mullidae), from the southern Tyrrhenian Sea: the role of the surf zone as a feeding ground. *Mar. Biol. Res.* 10, 167–178.  
612 doi:10.1080/17451000.2013.797585
- 613 Expósito, N., Rovira, J., Sierra, J., Folch, J., Schuhmacher, M., 2021. Microplastics levels, size, morphology and composition in marine water,

- 614 sediments and sand beaches. Case study of Tarragona coast (western Mediterranean). *Sci. Total Environ.*  
615 doi:10.1016/j.scitotenv.2021.147453
- 616 Fagiano, V., Alomar, C., Compa, M., Soto-Navarro, J., Jordá, G., Deudero, S., 2022. Neustonic microplastics and zooplankton in coastal waters  
617 of Cabrera Marine Protected Area (Western Mediterranean Sea). *Sci. Total Environ.* 804, 150120.  
618 doi:10.1016/J.SCITOTENV.2021.150120
- 619 Flajnik, M.F., 2018. A cold-blooded view of adaptive immunity. *Nat. Rev. Immunol.* 18, 438–453. doi:10.1038/s41577-018-0003-9
- 620 Fortibuoni, T., Amadesi, B., Vlachogianni, T., 2021. Composition and abundance of macrolitter along the Italian coastline: The first baseline  
621 assessment within the european Marine Strategy Framework Directive. *Environ. Pollut.* 268, 115886. doi:10.1016/j.envpol.2020.115886
- 622 Fossi, M.C., Marsili, L., Bains, M., Giannetti, M., Coppola, D., Guerranti, C., Caliani, I., Minutoli, R., Lauriano, G., Finoia, M.G., Rubegni, F.,  
623 Panigada, S., Bérubé, M., Urbán Ramírez, J., Panti, C., 2016. Fin whales and microplastics: The Mediterranean Sea and the Sea of  
624 Cortez scenarios. *Environ. Pollut.* 209, 68–78. doi:10.1016/j.envpol.2015.11.022
- 625 Fossi, M.C., Panti, C., Guerranti, C., Coppola, D., Giannetti, M., Marsili, L., Minutoli, R., 2012. Are baleen whales exposed to the threat of  
626 microplastics? A case study of the Mediterranean fin whale (*Balaenoptera physalus*). *Mar. Pollut. Bull.* 64, 2374–2379.  
627 doi:10.1016/j.marpolbul.2012.08.013
- 628 Galgani, L., Beiras, R., Galgani, F., Panti, C., Borja, A., 2019. Editorial: Impacts of Marine Litter. *Front. Mar. Sci.* 6. doi:10.3389/fmars.2019.00208
- 629 Garcia-Vazquez, E., Cani, A., Diem, A., Ferreira, C., Geldhof, R., Marquez, L., Molloy, E., Perché, S., 2018. Leave no traces – Beached marine  
630 litter shelters both invasive and native species. *Mar. Pollut. Bull.* 131, 314–322. doi:10.1016/j.marpolbul.2018.04.037
- 631 GESAMP, 2015. Sources, fate and effects of microplastics in the marine environment: a global assessment, IMO/FAO/UN. ed, Rep. Stud.  
632 GESAMP.
- 633 Giani, D., Bains, M., Galli, M., Casini, S., Fossi, M.C., 2019. Microplastics occurrence in edible fish species (*Mullus barbatus* and *Merluccius*  
634 *merluccius*) collected in three different geographical sub-areas of the Mediterranean Sea. *Mar. Pollut. Bull.* 140, 129–137.  
635 doi:10.1016/j.marpolbul.2019.01.005
- 636 Gomiero, A., Strafella, P., Pellini, G., Salvalaggio, V., Fabi, G., 2018. Comparative Effects of Ingested PVC Micro Particles With and Without  
637 Adsorbed Benzo(a)pyrene vs. Spiked Sediments on the Cellular and Sub Cellular Processes of the Benthic Organism *Hediste*  
638 *diversicolor*. *Front. Mar. Sci.* 5. doi:10.3389/fmars.2018.00099
- 639 Guerrero, M.C., Aragona, M., Porcino, C., Fazio, F., Laurà, R., Levanti, M., Montalbano, G., Germanà, G., Abbate, F., Germanà, A., 2021. Micro  
640 and Nano Plastics Distribution in Fish as Model Organisms: Histopathology, Blood Response and Bioaccumulation in Different Organs.  
641 *Appl. Sci.* 11, 5768. doi:10.3390/app11135768
- 642 Guo, X., Wang, J., 2019. The chemical behaviors of microplastics in marine environment: A review. *Mar. Pollut. Bull.* 142, 1–14.  
643 doi:10.1016/j.marpolbul.2019.03.019
- 644 Isobe, A., Iwasaki, S., Uchida, K., Tokai, T., 2019. Abundance of non-conservative microplastics in the upper ocean from 1957 to 2066. *Nat.*  
645 *Commun.* 10, 1–3. doi:10.1038/s41467-019-08316-9
- 646 Jambeck, J.R., Geyer, R., Wilcox, C., Siegler, T.R., Perryman, M., Andrady, A., Narayan, R., Law, K.L., 2015. Plastic waste inputs from land into  
647 the ocean. *Science (80-. )*. 347, 768–771. doi:10.1126/science.1260352
- 648 Kazour, M., Jemaa, S., Issa, C., Khalaf, G., Amara, R., 2019. Microplastics pollution along the Lebanese coast (Eastern Mediterranean Basin):  
649 Occurrence in surface water, sediments and biota samples. *Sci. Total Environ.* doi:10.1016/j.scitotenv.2019.133933
- 650 Kiessling, T., Gutow, L., Thiel, M., 2015. Marine Litter as Habitat and Dispersal Vector, in: *Marine Anthropogenic Litter*. Springer International  
651 Publishing, Cham, pp. 141–181. doi:10.1007/978-3-319-16510-3\_6
- 652 Kowalski, N., Reichardt, A.M., Waniek, J.J., 2016. Sinking rates of microplastics and potential implications of their alteration by physical,  
653 biological, and chemical factors. *Mar. Pollut. Bull.* 109, 310–319. doi:10.1016/j.marpolbul.2016.05.064
- 654 Ling, S.D., Sinclair, M., Levi, C.J., Reeves, S.E., Edgar, G.J., 2017. Ubiquity of microplastics in coastal seafloor sediments. *Mar. Pollut. Bull.* 121,  
655 104–110. doi:10.1016/j.marpolbul.2017.05.038
- 656 Löhr, A., Savelli, H., Beunen, R., Kalz, M., Ragas, A., Van Belleghem, F., 2017. Solutions for global marine litter pollution. *Curr. Opin. Environ.*



- 657 Sustain. 28, 90–99. doi:10.1016/j.cosust.2017.08.009
- 658 Lucci, F., Della Ventura, G., Piazzolla, D., Venettacci, C., Terribili, A., La Bella, C., Conte, A., Scanu, S., Bonamano, S., Radica, F., Marcelli, M.,  
659 2021. Development and testing for a low-cost device for airborne PM monitoring: the port of Civitavecchia (Italy) during COVID-19  
660 lockdown. Atmos. Environ. under Submiss.
- 661 Lusher, A.L., McHugh, M., Thompson, R.C., 2013. Occurrence of microplastics in the gastrointestinal tract of pelagic and demersal fish from the  
662 English Channel. Mar. Pollut. Bull. 67, 94–99. doi:10.1016/j.marpolbul.2012.11.028
- 663 Lusher, A.L., Tirelli, V., O'Connor, I., Officer, R., 2015. Microplastics in Arctic polar waters: the first reported values of particles in surface and sub-  
664 surface samples. Sci. Rep. 5, 14947. doi:10.1038/srep14947
- 665 Mahto, S.K., Chandra, P., Rhee, S.W., 2010. In vitro models, endpoints and assessment methods for the measurement of cytotoxicity. Toxicol.  
666 Environ. Health Sci. 2, 87–93. doi:10.1007/BF03216487
- 667 Mancini, E., Miccoli, A., Piazzolla, D., Saraceni, P.R., Lezzi, M., Tiralongo, F., Bonifazi, A., Picchiatti, S., Marcelli, M., 2021. Macrozoobenthic  
668 fauna associated with benthic marine litter (Northern Tyrrhenian Sea, Italy) and first report of two bryozoan species in Italian waters. Reg.  
669 Stud. Mar. Sci. 47, 101912. doi:10.1016/j.rsma.2021.101912
- 670 Mancuso, M., Savoca, S., Bottari, T., 2019. First record of microplastics ingestion by European hake *Merluccius merluccius* from the Tyrrhenian  
671 Sicilian coast (Central Mediterranean Sea). J. Fish Biol. 94, 517–519. doi:10.1111/jfb.13920
- 672 Mazurais, D., Ernande, B., Quazuguel, P., Severe, A., Huelvan, C., Madec, L., Mouchel, O., Soudant, P., Robbens, J., Huvet, A., Zambonino-  
673 Infante, J., 2015. Evaluation of the impact of polyethylene microbeads ingestion in European sea bass (*Dicentrarchus labrax*) larvae. Mar.  
674 Environ. Res. 112, 78–85. doi:10.1016/j.marenvres.2015.09.009
- 675 Miccoli, A., Buonocore, F., Picchiatti, S., Scapigliati, G., 2021. The sea bass *Dicentrarchus labrax* as a marine model species in immunology :  
676 Insights from basic and applied research. Aquac. Fish. doi:10.1016/j.aaf.2021.09.003
- 677 Moore, C.J., 2008. Synthetic polymers in the marine environment: A rapidly increasing, long-term threat. Environ. Res. 108, 131–139.  
678 doi:10.1016/j.envres.2008.07.025
- 679 Nguyen, T.H., Tang, F.H.M., Maggi, F., 2020. Sinking of microbial-associated microplastics in natural waters. PLoS One 15, e0228209.  
680 doi:10.1371/journal.pone.0228209
- 681 OECD, 2021. Test No. 249: Fish Cell Line Acute Toxicity - The RTgill-W1 cell line assay, OECD Guidelines for the Testing of Chemicals, Section  
682 2. OECD, Paris. doi:10.1787/C66D5190-EN
- 683 Pannetier, P., Morin, B., Le Bihanic, F., Dubreil, L., Clérandeau, C., Chouvellon, F., Van Arkel, K., Danion, M., Cachot, J., 2020. Environmental  
684 samples of microplastics induce significant toxic effects in fish larvae. Environ. Int. 134, 105047. doi:10.1016/j.envint.2019.105047
- 685 Panti, C., Giannetti, M., Bainsi, M., Rubegni, F., Minutoli, R., Fossi, M.C., 2015. Occurrence, relative abundance and spatial distribution of  
686 microplastics and zooplankton NW of Sardinia in the Pelagos Sanctuary Protected Area, Mediterranean Sea. Environ. Chem. 12, 618.  
687 doi:10.1071/EN14234
- 688 Pedà, C., Caccamo, L., Fossi, M.C., Gai, F., Andaloro, F., Genovese, L., Perdichizzi, A., Romeo, T., Maricchiolo, G., 2016. Intestinal alterations in  
689 European sea bass *Dicentrarchus labrax* (Linnaeus, 1758) exposed to microplastics: Preliminary results. Environ. Pollut.  
690 doi:10.1016/j.envpol.2016.01.083
- 691 Piazzolla, D., Cafaro, V., de Lucia, G.A., Mancini, E., Scanu, S., Bonamano, S., Piermattei, V., Vianello, A., Della Ventura, G., Marcelli, M., 2020.  
692 Microlitter pollution in coastal sediments of the northern Tyrrhenian Sea, Italy: microplastics and fly-ash occurrence and distribution.  
693 Estuar. Coast. Shelf Sci. doi:10.1016/j.ecss.2020.106819
- 694 Pittura, L., Avio, C.G., Giuliani, M.E., D'Errico, G., Keiter, S.H., Cormier, B., Gorbi, S., Regoli, F., 2018. Microplastics as Vehicles of  
695 Environmental PAHs to Marine Organisms: Combined Chemical and Physical Hazards to the Mediterranean Mussels, *Mytilus*  
696 galloprovincialis. Front. Mar. Sci. 5. doi:10.3389/fmars.2018.00103
- 697 Prevenios, M., Zeri, C., Tsangaris, C., Liubartseva, S., Fakiris, E., Papatheodorou, G., 2018. Beach litter dynamics on Mediterranean coasts:  
698 Distinguishing sources and pathways. Mar. Pollut. Bull. 129, 448–457. doi:10.1016/j.marpolbul.2017.10.013
- 699 Primpke, S., Wirth, M., Lorenz, C., Gerdt, G., 2018. Reference database design for the automated analysis of microplastic samples based on

- 700 Fourier transform infrared (FTIR) spectroscopy. *Anal. Bioanal. Chem.* 410, 5131–5141. doi:10.1007/s00216-018-1156-x
- 701 Renzi, M., Blašković, A., Bernardi, G., Russo, G.F., 2018. Plastic litter transfer from sediments towards marine trophic webs: A case study on  
702 holothurians. *Mar. Pollut. Bull.* 135, 376–385. doi:10.1016/j.marpolbul.2018.07.038
- 703 Revel, M., Roman, C., Châtel, A., 2021. Is cell culture a suitable tool for the evaluation of micro- and nanoplastics ecotoxicity? *Ecotoxicology* 30,  
704 421–430. doi:10.1007/s10646-021-02355-z
- 705 Rios-Fuster, B., Alomar, C., Compa, M., Guijarro, B., Deudero, S., 2019. Anthropogenic particles ingestion in fish species from two areas of the  
706 western Mediterranean Sea. *Mar. Pollut. Bull.* 144, 325–333. doi:10.1016/j.marpolbul.2019.04.064
- 707 Rios-Fuster, B., Arechavala-Lopez, P., García-Marcos, K., Alomar, C., Compa, M., Álvarez, E., Julià, M.M., Solomando Martí, A., Sureda, A.,  
708 Deudero, S., 2021. Experimental evidence of physiological and behavioral effects of microplastic ingestion in *Sparus aurata*. *Aquat.*  
709 *Toxicol.* 231, 105737. doi:10.1016/j.aquatox.2020.105737
- 710 Rios, L.M., Moore, C., Jones, P.R., 2007. Persistent organic pollutants carried by synthetic polymers in the ocean environment. *Mar. Pollut. Bull.*  
711 54, 1230–1237. doi:10.1016/j.marpolbul.2007.03.022
- 712 Rogers, K.L., Carreres-Calabuig, J.A., Gorokhova, E., Posth, N.R., 2020. Micro-by-micro interactions: How microorganisms influence the fate of  
713 marine microplastics. *Limnol. Oceanogr. Lett.* 5, 18–36. doi:10.1002/lol2.10136
- 714 Ru, J., Huo, Y., Yang, Y., 2020. Microbial Degradation and Valorization of Plastic Wastes. *Front. Microbiol.* 11. doi:10.3389/fmicb.2020.00442
- 715 Sabatella, E.C., Colloca, F., Coppola, G., Fiorentino, F., Gambino, M., Malvarosa, L., Sabatella, R., 2017. Key Economic Characteristics of Italian  
716 Trawl Fisheries and Management Challenges. *Front. Mar. Sci.* 4. doi:10.3389/fmars.2017.00371
- 717 Sala, A., Conides, A., De Carlo, F., Klaoudatos, D., Grech, D., Lucchetti, A., Mayans, A., Notti, E., Paci, N., Salom, S., Sartor, P., Sbrana, M.,  
718 Soler, I., Spedicato, M.T., Virgili, M., 2013. Final project report Technical specifications of Mediterranean trawl gears (myGears).  
719 doi:10.13140/RG.2.2.24528.76804
- 720 Savoca, S., Capillo, G., Mancuso, M., Bottari, T., Crupi, R., Branca, C., Romano, V., Faggio, C., D'Angelo, G., Spanò, N., 2019. Microplastics  
721 occurrence in the Tyrrhenian waters and in the gastrointestinal tract of two congener species of seabreams. *Environ. Toxicol. Pharmacol.*  
722 67, 35–41. doi:10.1016/j.etap.2019.01.011
- 723 Scapigliati, G., Fausto, A.M., Picchietti, S., 2018. Fish Lymphocytes: An Evolutionary Equivalent of Mammalian Innate-Like Lymphocytes? *Front.*  
724 *Immunol.* 9, 1–8. doi:10.3389/fimmu.2018.00971
- 725 Schoonen, W.G.E.J., de Roos, J.A.D.M., Westerink, W.M.A., Débiton, E., 2005. Cytotoxic effects of 110 reference compounds on HepG2 cells  
726 and for 60 compounds on HeLa, ECC-1 and CHO cells. *Toxicol. Vitr.* 19, 491–503. doi:10.1016/j.tiv.2005.01.002
- 727 Sendra, M., Pereiro, P., Yeste, M.P., Mercado, L., Figueras, A., Novoa, B., 2021. Size matters: Zebrafish (*Danio rerio*) as a model to study toxicity  
728 of nanoplastics from cells to the whole organism. *Environ. Pollut.* 268, 115769. doi:10.1016/j.envpol.2020.115769
- 729 Shim, W.J., Hong, S.H., Eo, S., 2018. Marine Microplastics: Abundance, Distribution, and Composition, in: Zeng, E. (Ed.), *Microplastic*  
730 *Contamination in Aquatic Environments*. Elsevier, pp. 1–26. doi:10.1016/B978-0-12-813747-5.00001-1
- 731 Sussarellu, R., Suquet, M., Thomas, Y., Lambert, C., Fabioux, C., Pernet, M.E.J., Le Goïc, N., Quillien, V., Mingant, C., Epelboin, Y., Corporeau,  
732 C., Guyomarch, J., Robbens, J., Paul-Pont, I., Soudant, P., Huvet, A., 2016. Oyster reproduction is affected by exposure to polystyrene  
733 microplastics. *Proc. Natl. Acad. Sci.* 113, 2430–2435. doi:10.1073/pnas.1519019113
- 734 Tekman, M.B., Gutow, L., Macario, A., Haas, A., Walter, A., Bergmann, M., 2021. LITTERBASE [WWW Document]. Alfred Wegener Inst.  
735 Helmholtz Cent. Polar Mar. Res. URL [https://litterbase.awi.de/litter\\_detail](https://litterbase.awi.de/litter_detail)
- 736 Thompson, R.C., Olsen, Y., Mitchell, R.C., Davis, A., Rowland, S.J., John, A.W.G., McGonigle, D., Russel, A.E., 2004. Lost at Sea: Where Is All  
737 the Plastic? *Science* (80-. ). 304, 838–838. doi:10.1126/science.1094559
- 738 Tiralongo, F., Mancini, E., Ventura, D., de Malherbe, S., Paladini de Mendoza, F., Sardone, M., Arciprete, R., Massi, D., Marcelli, M., Fiorentino,  
739 F., Minervini, R., 2021. Commercial catches and discards composition in the central Tyrrhenian Sea: a multispecies quantitative and  
740 qualitative analysis from shallow and deep bottom trawling. *Mediterr. Mar. Sci.* 22, 521–531. doi:10.12681/mms.25753
- 741 UNEP/MAP, 2015. Marine litter assessment in the Mediterranean Sea. Athens (Greece).
- 742 UNEP, 2016. Marine plastic debris and microplastics - Global Lessons and Research to Inspire Action and guide policy change, UN.

- 743 UNEP, 2014. Valuing Plastics: The Business Case for Measuring, Managing and Disclosing Plastic Use in the Consumer Goods Industry, UN.
- 744 van der Hal, N., Ariel, A., Angel, D.L., 2017. Exceptionally high abundances of microplastics in the oligotrophic Israeli Mediterranean coastal
- 745 waters. *Mar. Pollut. Bull.* doi:10.1016/j.marpolbul.2016.12.052
- 746 Van Sebille, E., Aliani, S., Law, K.L., Maximenko, N., Alsina, J.M., Bagaev, A., Bergmann, M., Chapron, B., Chubarenko, I., Cózar, A.,
- 747 Delandmeter, P., Egger, M., Fox-Kemper, B., Garaba, S.P., Goddijn-Murphy, L., Hardesty, B.D., Hoffman, M.J., Isobe, A., Jongedijk, C.E.,
- 748 Kaandorp, M.L.A., Khatmullina, L., Koelmans, A.A., Kukulka, T., Laufkötter, C., Lebreton, L., Lobelle, D., Maes, C., Martinez-Vicente, V.,
- 749 Morales Maqueda, M.A., Poulain-Zarcos, M., Rodríguez, E., Ryan, P.G., Shanks, A.L., Shim, W.J., Suaria, G., Thiel, M., Van Den Bremer,
- 750 T.S., Wichmann, D., 2020. The physical oceanography of the transport of floating marine debris. *Environ. Res. Lett.* doi:10.1088/1748-
- 751 9326/ab6d7d
- 752 van Sebille, E., Wilcox, C., Lebreton, L., Maximenko, N., Hardesty, B.D., van Franeker, J.A., Eriksen, M., Siegel, D., Galgani, F., Law, K.L., 2015.
- 753 A global inventory of small floating plastic debris. *Environ. Res. Lett.* 10, 124006. doi:10.1088/1748-9326/10/12/124006
- 754 Vasilopoulou, G., Kehayias, G., Kletou, D., Kleitou, P., Triantafyllidis, V., Zotos, A., Antoniadis, K., Rousou, M., Papadopoulos, V., Polykarpou, P.,
- 755 Tsiamis, G., 2021. Microplastics Investigation Using Zooplankton Samples from the Coasts of Cyprus (Eastern Mediterranean). *Water*
- 756 2021, Vol. 13, Page 2272 13, 2272. doi:10.3390/W13162272
- 757 Wright, S.L., Thompson, R.C., Galloway, T.S., 2013. The physical impacts of microplastics on marine organisms: A review. *Environ. Pollut.* 178,
- 758 483–492. doi:10.1016/j.envpol.2013.02.031
- 759 Yong, C., Valiyaveetil, S., Tang, B., 2020. Toxicity of Microplastics and Nanoplastics in Mammalian Systems. *Int. J. Environ. Res. Public Health*
- 760 17, 1509. doi:10.3390/ijerph17051509
- 761 Zapata, A., Diez, B., Cejalvo, T., Gutiérrez-De Frías, C., Cortés, A., 2006. Ontogeny of the immune system of fish. *Fish Shellfish Immunol.* 20,
- 762 126–136. doi:10.1016/j.fsi.2004.09.005
- 763 Zettler, E.R., Mincer, T.J., Amaral-Zettler, L.A., 2013. Life in the “Plastisphere”: Microbial Communities on Plastic Marine Debris. *Environ. Sci.*
- 764 *Technol.* 47, 7137–7146. doi:10.1021/es401288x
- 765 Zhang, W., Zhang, S., Wang, J., Wang, Y., Mu, J., Wang, P., Lin, X., Ma, D., 2017. Microplastic pollution in the surface waters of the Bohai Sea,
- 766 China. *Environ. Pollut.* 231, 541–548. doi:10.1016/j.envpol.2017.08.058
- 767 Zhao, S., Zhu, L., Wang, T., Li, D., 2014. Suspended microplastics in the surface water of the Yangtze Estuary System, China: First observations
- 768 on occurrence, distribution. *Mar. Pollut. Bull.* 86, 562–568. doi:10.1016/j.marpolbul.2014.06.032
- 769 Zitouni, N., Bousserhine, N., Missawi, O., Boughattas, I., Chèvre, N., Santos, R., Belbekhouche, S., Alphonse, V., Tisserand, F., Balmassiere, L.,
- 770 Dos Santos, S.P., Mokni, M., Guerbej, H., Banni, M., 2021. Uptake, tissue distribution and toxicological effects of environmental
- 771 microplastics in early juvenile fish *Dicentrarchus labrax*. *J. Hazard. Mater.* 403. doi:10.1016/j.jhazmat.2020.124055
- 772 Zwollo, P., Quddos, F., Bagdassarian, C., Seeley, M.E., Hale, R.C., Abderhalden, L., 2021. Polystyrene microplastics reduce abundance of
- 773 developing B cells in rainbow trout (*Oncorhynchus mykiss*) primary cultures. *Fish Shellfish Immunol.* 114, 102–111.
- 774 doi:10.1016/j.fsi.2021.04.014
- 775
