1 **Title**

2 First evidence of *in vitro* cytotoxic effects of marine microlitter on *Merluccius merluccius* and  
3 *Mullus barbatus*, two Mediterranean commercial fish species

4

5 **Authors**

6 Miccoli A\*<sup>1</sup>, Mancini E<sup>2</sup>, Saraceni PR<sup>1</sup>, Della Ventura G<sup>3,4</sup>, Scapigliati G<sup>1</sup> and Picchietti S<sup>1</sup>

7 <sup>1</sup> Department for Innovation in Biological, Agro-food and Forest Systems, University of

8 Tuscia, Viterbo, 01100, Italy

9 <sup>2</sup> Italian Fishery Research and Studies Center, Rome, 00184, Italy

10 <sup>3</sup> Department of Science, Roma 3 University, Rome, 00146, Italy

11 <sup>4</sup> INFN Laboratori Nazionali di Frascati, Via E. Fermi 54, Frascati, 00044, Italy

12 \*Corresponding author, [andrea.miccoli@unitus.it](mailto:andrea.miccoli@unitus.it)

13

14 **ORCID**

15 AM: 0000-0002-4545-7229

16 SP: 0000-0002-6116-213X

17 GDV: 0000-0001-6277-961X

18

19

20 **Abstract**

21 Marine litter is composed mainly of plastics and is recognized as a serious threats to marine  
22 ecosystems. Ecotoxicological approaches have started elucidating the potential severity of  
23 microplastics (MPs) in controlled laboratory studies with pristine materials but no information  
24 exist on marine environmental microlitter as a whole. Here, we characterized the litter in the  
25 coastal Northern Tyrrhenian sea and in the stomach of two fish species of socio-economic  
26 importance, and exposed primary cell cultures of mucosal and lymphoid organs to marine  
27 microlitter for evaluating possible cytotoxic effects. An average of  $0.30 \pm 0.02$  microlitter items  
28  $m^{-3}$  was found in water samples.  $\mu$ FT-IR analysis revealed that plastic particles, namely HDPE,  
29 polyamide and polypropylene were present in 100% and 83.3% of *Merluccius merluccius* and  
30 *Mullus barbatus* analyzed, which overall ingested  $14.67 \pm 4.10$  and  $5.50 \pm 1.97$   
31 items/individual, respectively. Moreover, microlitter was confirmed as a vector of  
32 microorganisms. Lastly, the apical end-point of viability was found to be significantly reduced  
33 in splenic cells exposed *in vitro* to two microlitter conditions. Considering the role of the spleen  
34 in the mounting of adaptive immune responses, our results warrant more in-depth  
35 investigations for clarifying the actual susceptibility of these two species to anthropogenic  
36 microlitter.

37

38 **Keywords**

39 Marine microlitter; Bioindicators; Cytotoxicity; *In vitro* approaches; Primary cell cultures;  
40 Biological agents

41 **Highlights**

- 42 ●  $0.30 \pm 0.02$  microlitter items  $m^{-3}$  were found at the surface of coastal Northern  
43 Tyrrhenian sea
- 44 ●  $14.67 \pm 4.10$  and  $5.50 \pm 1.97$  items/individual were retrieved from the stomach of  
45 hakes and mullets
- 46 ● The ingested microlitter contained plastic items
- 47 ● Microlitter was validated as a carrier of bacteria, fungi and flagellates
- 48 ● Splenic cells exposed to two microlitter conditions for 72 hours suffered cytotoxicity

49 **Figure/Table captions**

50 Fig. 1 Map of sampling sites - Study area with 250  $\mu\text{m}$  net tows GPS positions, haul route  
51 and bathymetry.

52 Fig. 2 A-E Microlitter collected from sea surface - Some examples of litter particles collected  
53 from surface 250  $\mu\text{m}$  net tows (SUP1-SUP4).

54 Fig. 3 Quali-quantitative characterization of anthropogenic litter collected from the sea  
55 surface- A) Particle density of the micro- and macrolitter fractions per net tow. Average litter  
56 density is reported as mean  $\pm$  SE. B) Cumulative microlitter density per item type per net  
57 tow. C) Size class distribution per litter shape type. D-F) Percentage of color abundance per  
58 microlitter shape type.

59 Fig. 4 Examples of microlitter items retrieved from the digestive tract of fish - A) White  
60 fragment from *M. barbatus*, 0.58 match with polyamide (Primpke et al., 2018). B) Black  
61 filament from *M. merluccius*, 0.46 match with HDPE (Chabuka and Kalivas, 2020). C) Green  
62 fragment from *M. merluccius*, 0.72 match with HDPE (Chabuka and Kalivas, 2020). Scale  
63 bars: 500  $\mu\text{m}$ .

64 Fig. 5 Quali-quantitative characterization of microlitter retrieved from fish stomach contents -  
65 A) Microlitter particle abundance distribution per species (log y scale). Whiskers plotted  
66 according to the Tukey method. B) Cumulative particle abundance per type. C) Size class  
67 distribution per microlitter shape type per species. D-G) Percentage of color abundance per  
68 microlitter shape type per species.

69 Fig. 6  $\mu\text{FT-IR}$  spectra - Spectra of randomly selected representative microlitter items  
70 retrieved from fish stomach contents. A) Blue fragment from *M. barbatus*; B) blue filament  
71 from *M. merluccius*; C) white fragment from *M. barbatus*. Matching with reference polymer  
72 as per the Open Specy open source database. r: Pearson's correlation coefficient as  
73 measure of linear correlation between data sets.

74 Fig. 7 A-D Microlitter as a vector of biological agents - Examples of microorganisms  
75 observed in cell suspensions following a 72-hour incubation with microlitter. A) European

76 hake splenic cell, negative control. B-D) Grey, white and black arrowheads indicate  
77 bacilliform bacteria, unicellular fungi and flagellates, respectively. Scale bars: 10  $\mu\text{m}$ .  
78 Fig. 8 Quantification of intracellular ATP content as a proxy of cell viability - ATP data  
79 distribution per species, time, organ and treatment. Statistical significance as per one-way  
80 ANOVA followed by Tukey's HSD *post hoc* test. \*:  $p < 0.05$   
81 Fig. 9 Comparison of microlitter densities retrieved from representative scientific literature  
82 with data herein presented. Boxes indicate mean  $\pm$  SD items  $\text{m}^{-3}$ . Sampling locations  
83 differentiated by color-coding.  
84 Table 1 Sampling details - Summary of the experimental campaign with net tows details.  
85 Time expressed as UTC/GMT +2:00.  
86 Table 2 Full statistical details of the rank-based nonparametric Kruskal-Wallis tests  
87 performed on microbial counts per species and organ. ns: non significant.  
88 Table S1 Sea surface microlitter abundance and density (items  $\text{m}^{-3}$ ) per color per type per  
89 net tow and relative share of litter types.  
90 Table S2 Sea surface litter size classes per particle type per net tow.  
91 Table S3 Full statistical details of the one way ANOVA tests performed on cytotoxic data of  
92 A) *Merluccius merluccius* and B) *Mullus barbatus*, per time and organ. DF<sub>n</sub>: degrees of  
93 freedom in the numerator; DF<sub>d</sub>: degrees of freedom in the denominator; F: test statistic for  
94 ANOVA; ges: generalized eta squared.

## 95        **1. Introduction**

96 Coastal areas are subject to an exponential increase in population density and the  
97 development of impacting human activities, e.g. industries, tourism, recreational activities,  
98 fishing and aquaculture. As a consequence, they can be affected by both sporadic and  
99 continuous pollution events, with consequences on all compartments, and are thus considered  
100 “hotspots” of contamination (Llorca et al., 2020; Lu et al., 2018).

101 Marine litter is defined as “any anthropogenic manufactured, or processed solid material  
102 (regardless of size) discarded, disposed of, or abandoned in the environment, including all  
103 materials discarded into the sea, on the shore, or brought indirectly to the sea by rivers,  
104 sewage, storm water, waves, or winds” (UNEP, 2016). It is one of the most serious threats to  
105 marine ecosystems and a global environmental concern. It comprises glass, metal, cardboard  
106 and textiles items (Löhr et al., 2017) as well as anthropogenic particles produced by industrial  
107 activities (e.g., coal-fired power plants) and transport emissions (Piazzolla et al., 2020), but  
108 Tekman et al. (2021) revealed that plastic accounts for the 66-79% of the global litter  
109 composition.

110 Annual global plastic production accounted for 368 million tons in 2019 (Association of Plastic  
111 Manufacturers, 2020): about 1.3-3.1% of these (5-12 million tons year<sup>-1</sup>) reach the Oceans  
112 (Jambeck et al., 2015), and the total amount of floating plastic was estimated at 0.3 million  
113 tons (van Sebille et al., 2015). The Mediterranean Sea, in particular, is regarded as an  
114 accumulation zone for marine litter, with densities comparable to those of the five subtropical  
115 gyres (Cózar et al., 2015; UNEP/MAP, 2015; Van Sebille et al., 2020).

116 In addition to primary microplastics (MPs), i.e. particles that are purposefully manufactured of  
117 microscopic sizes < 5 mm, the vast majority of marine litter is subject to degradation by abiotic  
118 (UV radiation, mechanical abrasion, temperature) and biotic (microbiological  
119 depolymerization) agents, resulting into secondary MPs (Ru et al., 2020; Thompson et al.,  
120 2004). Their chemico-physical properties, such as type of polymer, density, size, shape,  
121 internal geometry and color, influence their transport, buoyancy and sinking as well as rates

122 of ingestion and removal by aquatic organisms (Kowalski et al., 2016; Nguyen et al., 2020;  
123 Shim et al., 2018).

124 Due to their small size, MPs are bioavailable to a variety of taxa (e.g. Cole et al., 2013; Fossi  
125 et al., 2018; Gomiero et al., 2018; Lusher et al., 2013; Pittura et al., 2018) and can either be  
126 mistaken with or selectively chosen instead of food (Clark et al., 2016; Moore, 2008), with  
127 demonstrated impacts. Once ingested, MPs can affect biological functions and tissue integrity  
128 of organisms (Cole et al., 2015; Pedà et al., 2016; Sussarellu et al., 2016). Moreover, MPs  
129 can be potential carriers of pollutants (Amelia et al., 2021; Guo and Wang, 2019) and can be  
130 colonized by microbial pathogens, transferring them along the trophic web (Caruso, 2019;  
131 Casabianca et al., 2019). Ecotoxicological and physiological impacts of MPs were also  
132 demonstrated in controlled laboratory studies, but the commercially-available and pristine  
133 materials employed hardly reflect the actual heterogeneity of the environmental litter.

134 The European hake *Merluccius merluccius* (Linnaeus, 1758) and the red mullet *Mullus*  
135 *barbatus* (Linnaeus, 1758) are good experimental models in MPs-related research because  
136 of their biological features, commercial relevance, abundance in the Mediterranean region and  
137 suitability as small-scale plastic pollution bioindicators. Building on research that  
138 demonstrated the presence of MPs in their gastrointestinal tracts (Atamanalp et al., 2021; Avio  
139 et al., 2020, 2015; Bellas et al., 2016; Digka et al., 2018; Giani et al., 2019; Mancuso et al.,  
140 2019), in the present study we hypothesized that microlitter could be retrieved from the marine  
141 environment and ingested by fish, and that it could affect the *in vitro* viability of  
142 immunologically-relevant cells. We therefore investigated the litter abundance in the coastal  
143 sector of Civitavecchia (Northern Tyrrhenian Sea, Latium, Italy) at the sea surface and in the  
144 stomachs of *M. merluccius* and *M. barbatus*. We also evaluated the microbiological  
145 contamination and the *in vitro* cytotoxicity of environmentally-collected microlitter particles on  
146 primary cell cultures of mucosal and lymphoid organs, with the ultimate aim of defining the  
147 actual susceptibility of these two socio-economically important fish species to anthropogenic  
148 microlitter.

149 **2. Material & Methods**

150 **a. Study area**

151 The research was conducted in the northern Tyrrhenian Sea (Italy), FAO's General Fisheries  
152 Commission for the Mediterranean (GFCM) Geographical Sub-Area 9 (GSA 9). The  
153 experimental campaign fell within the physiographical unit (PU) M. Argentario – Cape Linaro,  
154 and included the coastal platform that extends from Santa Severa (42.01676 N, 11.95604 E)  
155 to the Tarquinia coastal area (42.22243 N, 11.70495 E). The study area is characterized by a  
156 120-150 m deep continental margin and a sandy to sandy-muddy seabed, as reported in  
157 Mancini et al. (2021).

158 **b. Experimental campaign**

159 The experimental campaign took place on October 23<sup>rd</sup> 2020 and extended over a 14-hour  
160 period (03:00 - 17:00 UTC/GMT +2:00). Four 15-minute long horizontal tows with a 250  $\mu$ m  
161 mesh size net were performed at sea surface for litter sampling (Fig. 1). Table 1 reports time  
162 of start, GPS position, micro- and macrolitter abundance  $m^{-3}$  and meteo-marine conditions as  
163 per the World Meteorological Organization sea state coding.

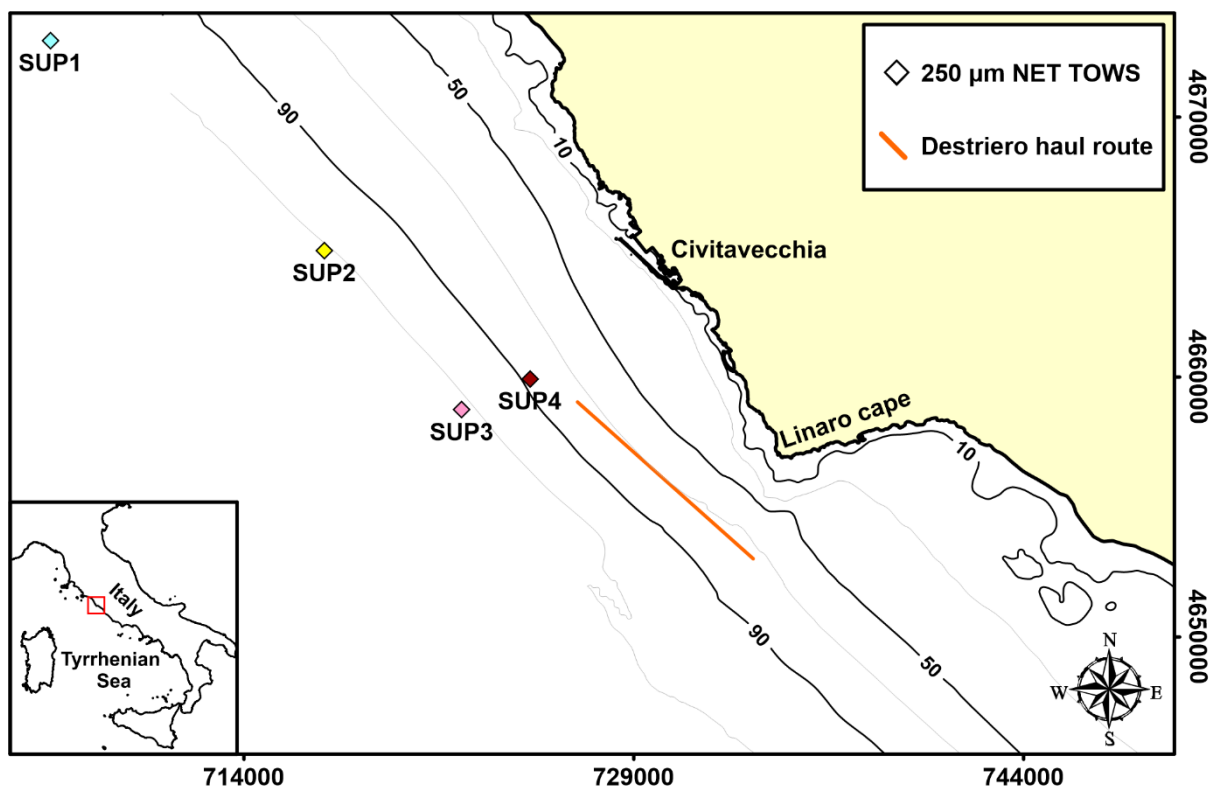

164

165



| Start time (sample #) | Start coordinates        | End coordinates           | Microlitter items m <sup>-3</sup> (>0.25, <5 mm) | Macrolitter items m <sup>-3</sup> (>0.5, < 6 cm) | Meteo-marine conditions |
|-----------------------|--------------------------|---------------------------|--------------------------------------------------|--------------------------------------------------|-------------------------|
| 07:35 (SUP1)          | 42°10.883N<br>11°30.070E | 42°10.570N<br>11°30.470E  | 0.29                                             | 0.008                                            | Calm (rippled)          |
| 11:15 (SUP2)          | 42°06.349N<br>11°37.538E | 42°05.789N<br>11°38.128E  | 0.23                                             | 0.01                                             | Smooth (wavelets)       |
| 14:05 (SUP3)          | 42°02.957N<br>11°41.231E | 42°02.4230N<br>11°41.919E | 0.32                                             | 0.013                                            | Smooth (wavelets)       |
| 16:45 (SUP4)          | 42°03.554N<br>11°43.158E | 42°03.522N<br>11°43.884E  | 0.35                                             | 0.023                                            | Sligth                  |

166

167

### c. Qualitative and quantitative characterization of litter at the sea surface

168

169

170

171

172

173

174

175

176

177

178

179

180

181

182

The 250 µm WP2 net was equipped with a metered line, a non-filtering cod-end and a flow meter. Upon deployment from the starboard side of the vessel, utmost care was taken to ensure that the net stretched out correctly. Upon retrieval, the content of the cod-end was transferred to 500 mL containers and stored at 4 °C until transported to the laboratory. To prevent airborne contamination in the laboratory, microlitter exposure to air was kept as short as possible and all following steps were performed under a sterile laminar flow cabinet previously cleaned with 100% ethanol. Each sample (SUP1-SUP4) was visually sorted 5 mL at a time using a stereomicroscope (Leica 8APO). Microlitter was classified in terms of shape (i.e. filament, fragment, film), color and diameter size (A: 250 < x < 500 µm; B: 500 < x < 1000 µm; C: 1000 < x < 3000 µm; D: 3000 < x < 5000 µm; E: x > 5000 µm). Size fractionation, as a method for representing litter size, was used in other recent peer-reviewed publications (Digka et al., 2018; Giani et al., 2019). Following the processing in the lab, microlitter sampled from the marine environment was stored in sterile 50 mL Falcon tubes filled with 0.22 µm-filtered sea water. Microlitter abundances are presented as items m<sup>-3</sup> of seawater ± standard error (SE).

183

### d. Fish sampling and characterization of litter quantity and quality in

184

#### stomach contents

185

186

187

188

189

Fish specimens were collected in the same area (October 30<sup>th</sup> 2020, 01:11:00 PM haul start time, haul start GPS position 41°59.669 N 11°49.214 E, haul end GPS position 42°03.0410 N 11°44.4621 E) by means of the bottom trawl net typically known as “volantina” geared with a cod-end mesh size of 50 mm diamond and a vertical opening of 4 m (Sala et al., 2013). *M. merluccius* and *M. barbatus* specimens had a total length (TL) of 18.6 ± 1.02 cm and 11.7 ±

190 0.64 and a body weight (BW) of  $47.1 \pm 8.7$  g and  $16.5 \pm 1.15$  g, respectively (average  $\pm$  SD):  
191 they were employed for the quali-quantitative characterization of microlitter within the stomach  
192 contents (n=6 per species) and for cytotoxicity assays (n=3 per species). Immediately  
193 following the opening of the net, specimens of similar within-species TL were sorted,  
194 thoroughly rinsed with 0.22  $\mu$ m-filtered Milli-Q water, wrapped in autoclaved aluminum foil and  
195 immediately transferred to ice, where they were kept until lab processing. Stomach eversion  
196 was not observed during sampling.

197 In the laboratory, fish stomachs were excised under a sterile laminar flow cabinet, previously  
198 cleaned with 100% ethanol, and preserved in 75% ethanol until processing. Tools for organ  
199 dissection (e.g. stainless steel tweezers and forceps, glass Petri dishes) were sterilized by  
200 autoclave. Stomach contents were then placed in sterile Petri dishes and visually sorted with  
201 a stereomicroscope (Leica 8APO) to classify litter particles in terms of shape, diameter size  
202 and color, using the same classification as in section 2c. The particles retrieved from the  
203 stomach contents were maintained in 50 mL falcon tubes with 0.22  $\mu$ m-filtered sea water.  
204 Microlitter abundances are presented as mean particles per species  $\pm$  standard error (items  $\pm$   
205 SE). Our workflow was compliant with the recommendations of Bessa et al. (2019) with  
206 regards to species selection, sampling methods, airborne/external cross-contamination  
207 prevention and particle classification.

#### 208 **e. $\mu$ FT-IR analysis**

209 To ascertain the nature of the microlitter items retrieved from fish stomach contents, forty items  
210 were analyzed by Fourier-transform infrared microspectroscopy ( $\mu$ FT-IR) following visual  
211 inspection. The subsample was representative of shape types, color and size ranges of items  
212 both within- and between-species. The experiments were performed at the DAFNE Laboratory  
213 of INFN (Frascati, Italy) in transmission mode, using a Bruker Hyperion 3000 FTIR microscope  
214 equipped with a Global IR source, a broadband beamsplitter (KBr) and a mercury-cadmium  
215 telluride (MCT) detector; the beam size was set at 20x20  $\mu$ m. Spectroscopic analysis yielded  
216 absorbance spectra, which were analyzed using the Open Specy open source database  
217 (Cowger et al., 2021) with the Pearson's correlation coefficient as measure of the linear

218 correlation between the data sets. Spectra visualization and overlay were achieved with the  
219 SpectraGryph 1.2 software using the peak normalization method (i.e. each spectrum highest  
220 peak within the visible area was set to 1).

#### 221 **f. Assessment of microlitter cytotoxic effects on fish primary cell cultures**

222 Marine microlitter particles were obtained by surface 250 µm net tows from the same sampling  
223 location of fish, and were stored in 50 mL falcon tubes filled with 0.22 µm-filtered sea water  
224 following visual inspection until employed for cytotoxicity assays. Microlitter particles were  
225 dried under laminar flow cabinet on a lint-free tissue (Kimwipes, Kimtech Science, USA) in a  
226 sterile glass Petri dish at room temperature and there counted using a stereo microscope (size  
227 ranging from 250 and 5000 µm, colors observed red, blue, black, green, grey). Isolation and  
228 cultivation of fish primary cells were performed according to published standard procedure  
229 (e.g. Miccoli et al., 2021b). Gills (G), head kidney (HK) and spleen (SPL) were dissected from  
230 *M. merluccius* and *M. barbatus* (n=3) under a sterile laminar flow cabinet previously cleaned  
231 with 100% ethanol with sterilized tools (see section 2d), and immediately immersed in cold  
232 Hank's Balanced Salt Solution without calcium and magnesium (HBSS), previously adjusted  
233 for appropriate sea water osmolarity (355 mOsm Kg<sup>-1</sup>) with 3M NaCl. Cells were obtained  
234 through teasing in cold HBSS using disposable strainers of 100 µm and 40 µm mesh size, and  
235 homogenates were washed by centrifugation (10 min, 400 g, 4 °C). Cells were then  
236 resuspended in L-15 (Leibovitz) medium containing 10% heat-inactivated fetal calf serum  
237 (FCS, Gibco) and antibiotics (penicillin–streptomycin, Gibco). Cells were counted in a  
238 Neubauer chamber and adjusted to a concentration of 5x10<sup>5</sup> cells mL<sup>-1</sup> in L-15 medium. Both  
239 HBSS and L-15 media were 0.22 µm-filtered.

240 Cellular suspensions were exposed to “Low” and “High” microlitter conditions corresponding  
241 to 4 and 20 field-collected microlitter particles/ml. Both microlitter concentrations were  
242 consistent number-wise with the ingestion rates of microlitter herein described, and the lowest  
243 microlitter concentration was in line with future modelled estimates weight-wise (Isobe et al.,  
244 2019).

245 Cells were cultured for 2 and 72 hours at 15 °C with gentle rotary shaking to ensure a  
246 continuous contact with microlitter particles. Because the bottom trawl net was not equipped  
247 with any temperature sensor, the incubation temperature was selected according to the near  
248 real-time numerical model MEDSEA\_ANALYSISFORECAST\_PHY\_006\_013 (Clementi et al.,  
249 2021), resolving for variable “sea\_water\_potential\_temperature\_at\_sea\_floor (bottomT)”  
250 using sampling location, date and depth as input. Three technical replicates per biological  
251 sample were used in all experimental groups. Negative controls consisting of cells incubated  
252 at the same conditions without microlitter were considered for each organ and species.  
253 Positive controls, i.e. cells incubated as negative controls but with 0.2% NaN<sub>3</sub>, were also tested  
254 separately for each organ and species. Intracellular ATP value, as a proxy of cell  
255 viability/cytotoxicity (Schoonen et al., 2005), was then quantitatively evaluated simultaneously  
256 in all samples of both species for any given incubation time using the ATPlite assay  
257 (PerkinElmer, catalog no. 6016943) following the manufacturer’s instructions: 50 µL of cell  
258 lysis and 50 µL substrate solutions were added to 100 µL cell suspensions per replicate and  
259 shaken for 5 min. Resulting homogenates were transferred to disposable opaque well plates  
260 (OptiPlate-96, PerkinElmer) and luminescence was measured using a microplate reader  
261 (Wallac Victor2, PerkinElmer), following a 10-minute dark adaptation period.

#### 262 **g. Validation of microlitter as a carrier of biological agents**

263 At the end of a 72-hour incubation of primary cultures with microlitter following an alike  
264 experimental design as above, 10 µL of cell suspension from each experimental group were  
265 qualitatively observed under a Zeiss microscope equipped with a colour 8 camera (AxioCam  
266 MRC) and a software package (KS 300 and AxioVision). Multiple sets of photographs at  
267 random frames were taken per each experimental group and microorganisms were quantified  
268 over a 100.000 µm<sup>2</sup> area by an operator unaware of treatments. Sterile glass slides and cover  
269 slips were used for these steps.

#### 270 **h. Data analysis, visualization and statistics**

271 Stomach content particle abundance was tested for statistical significance between species  
272 using an independent samples t-test with the null hypothesis of equal population means

273 between groups. Datasets were checked for normality with the Shapiro-Wilk test and for  
274 homoscedasticity with the Levene test. A log-transformation was applied to meet the normal  
275 distribution assumption.

276 The relation among species and ingestion of microlitter particle types by color was examined  
277 with a chi-square test on a two-way contingency table. The null hypothesis assumed no  
278 association between variables. Results are reported as  $\chi^2_{df}$ =test statistic.

279 Cytotoxicity data, grouped by species, time, organ and treatment, were tested for statistical  
280 significance using a one-way ANOVA with the null hypothesis of equal population means  
281 among groups, followed by a Tukey's HSD *post-hoc* test in case the main effect of the models  
282 was significant. Datasets were checked for normality with the Shapiro-Wilk test and for  
283 homoscedasticity with the Levene test.

284 Microbial count was analyzed with the rank-based nonparametric Kruskal-Wallis test because  
285 datasets, many of which were zero-inflated, did not meet the assumptions for parametric  
286 testing. The null hypothesis was that samples were drawn from the same population or from  
287 populations whose medians did not differ.

288 A comparison of microlitter densities retrieved from representative scientific literature was  
289 visualized as mean  $\pm$  SD items  $m^{-3}$  with the R "forestplot" package v 2.0.1. Data reported in  
290 other units than items  $m^{-3}$  were excluded from the analysis. References were organized  
291 hierarchically by location and year, and box size was set to constant.

#### 292 **i. Ethics statement**

293 Animal manipulation complied with the guidelines of the European Union Directive  
294 (2010/63/EU) and the Italian Legislative Decree 26 of 4 March 2014 "Attuazione della Direttiva  
295 2010/63/UE sulla protezione degli animali utilizzati a fini scientifici". Ethical review and  
296 approval was not required because animals were sampled from the natural environment and  
297 were not subject to any experimental manipulation, in line with the Explanatory Note of the  
298 Italian Ministry of Health's Directorate-General for Animal Health and Veterinary Medicinal  
299 Products (DGSAF) of 26 July 2017.

300 **3. Results**

301 **a. Qualitative and quantitative characterization of litter at the sea surface**

302 Anthropogenic marine litter visually of plastic origin and in the form of filaments, fragments  
303 and films was found in all water samples taken in the Civitavecchia area (Fig. 2, Table 1). Both  
304 microlitter ( $250 \mu\text{m} < x < 5 \text{ mm}$ ) and macrolitter ( $5 \text{ mm} < x < 6 \text{ cm}$ ) fractions were identified.

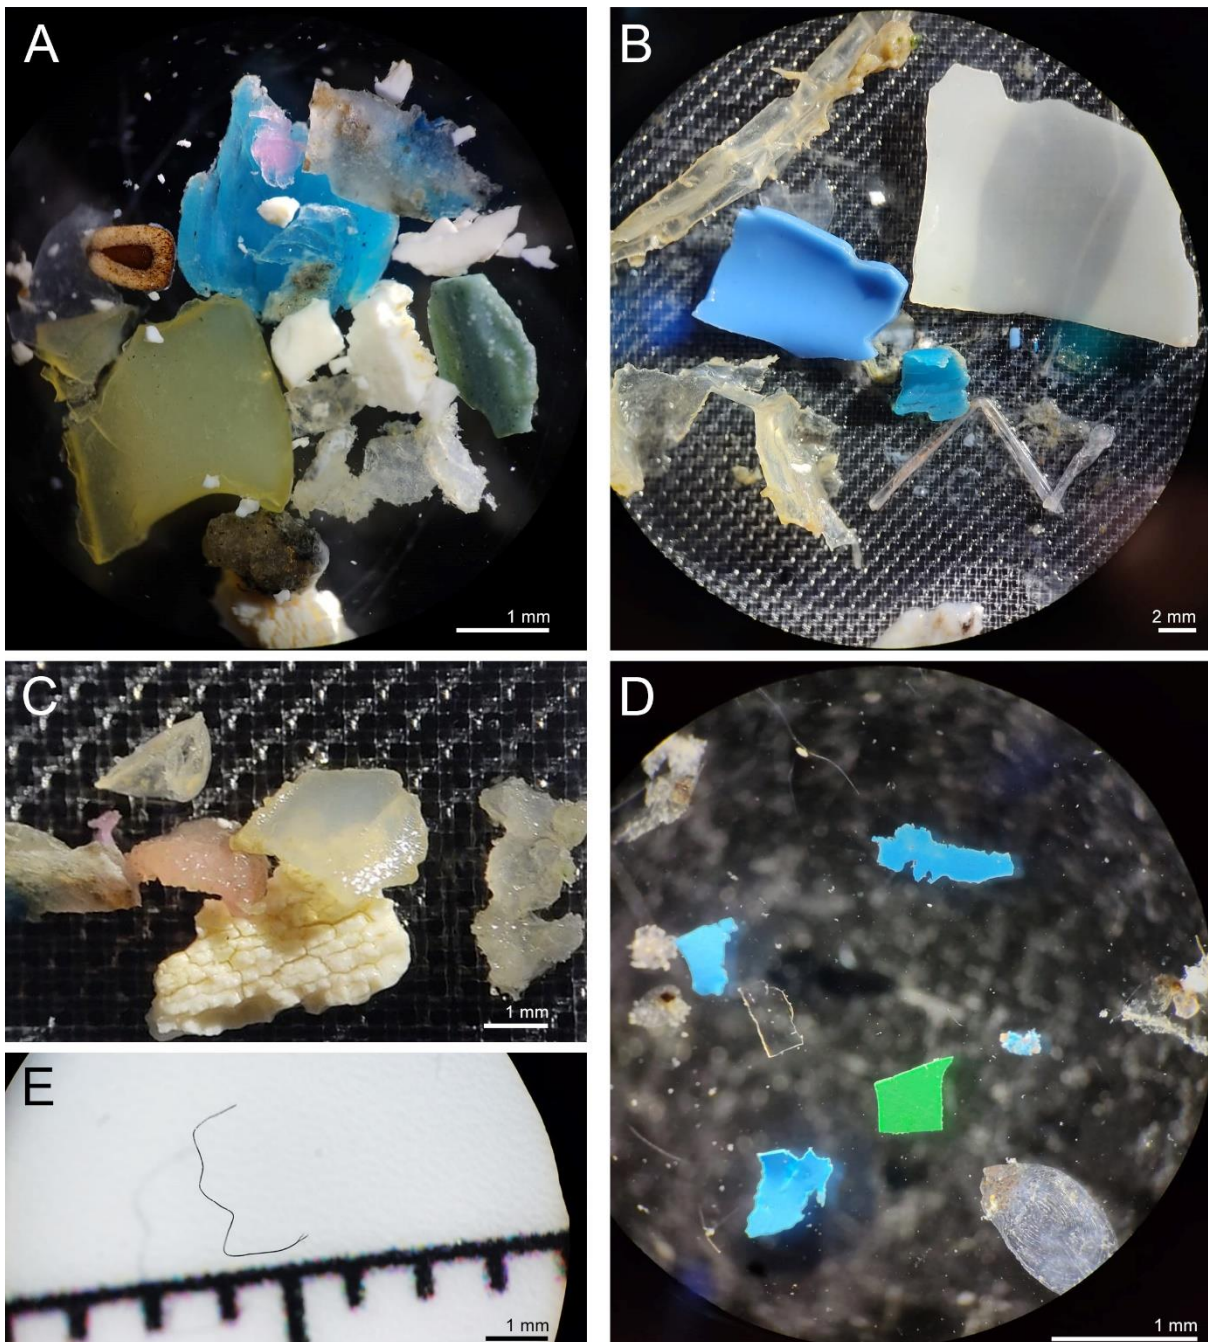

305

306

307 SUP4 and SUP2 had the highest and lowest microlitter particle densities with 0.35 and 0.23  
 308 items  $m^{-3}$ , respectively (Table 1). SUP4 and SUP 1 had the highest and lowest macrolitter  
 309 particle densities with 0.023 and 0.008 items  $m^{-3}$ , respectively (Table 1). Their average  
 310 abundance among all samples was  $0.30 \pm 0.02$  items  $m^{-3}$  and  $0.014 \pm 0.003$  items  $m^{-3}$  (Fig.  
 311 3A).

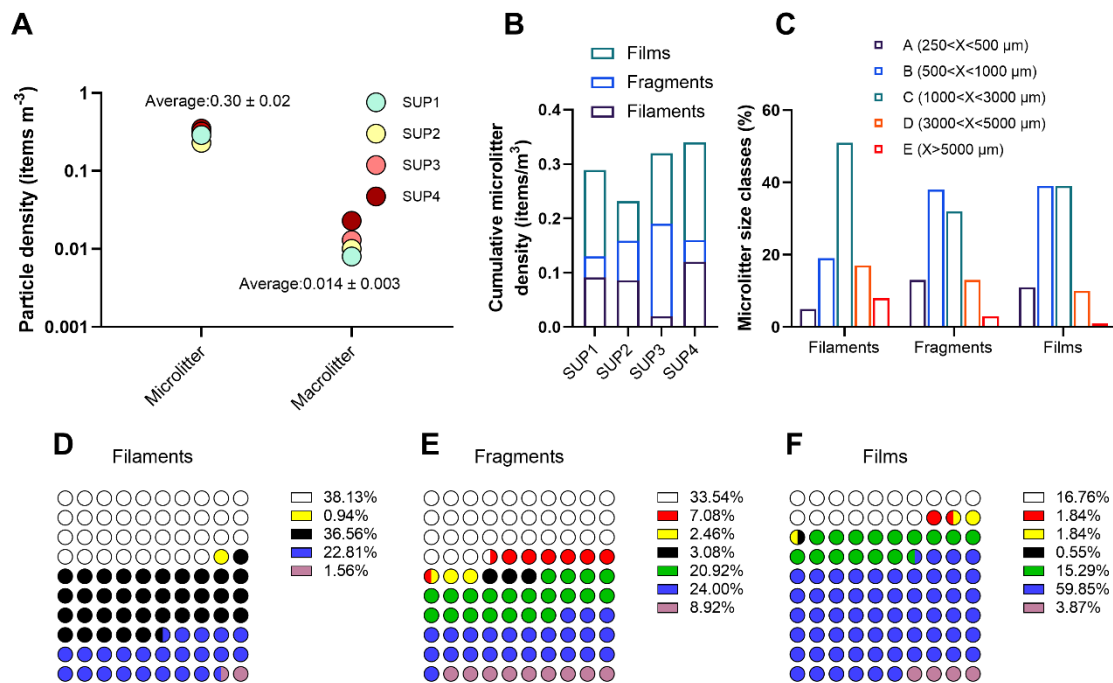

312

313 With regard to microlitter shapes, filaments, fragments and films were observed. In particular,  
 314 the highest and lowest concentration of filaments were found in SUP4 (0.12 items  $m^{-3}$ ) and  
 315 SUP3 (0.02 items  $m^{-3}$ ), respectively; the highest and lowest concentration of fragments were  
 316 found in SUP3 (0.17 items  $m^{-3}$ ) and SUP1 (0.039 items  $m^{-3}$ ), and the highest and lowest  
 317 concentration of films was found in SUP4 (0.18 items  $m^{-3}$ ) and SUP2 (0.07 items  $m^{-3}$ ) (Fig.  
 318 3B). Number and density of particles per type per color per station, total number of particles  
 319 collected and relative share of litter types are reported in Table S1.

320 The vast majority (51%) of filaments belonged to size class C and a smaller population to size  
 321 class A (5%). Fragments fell for the most part within size class B (38%), while size class E  
 322 was the least represented (3%). Films mostly belonged to size classes B and C (39%), while  
 323 size class E was found in the 1% of cases (Fig. 3C and Table S2).

324 Filaments from all tows were mostly white (38%) and black (37%); less frequent colors in terms  
325 of abundance were blue (23%) and yellow (1%). Fragments were more chromatically  
326 diversified: while most of them were white (34%), blue and green fragments were found with  
327 a percentage of 24% and 21%, respectively; red (7%), black (3%) and yellow (2%) fragments  
328 were less abundant. Films were mostly blue (60%), followed by white (17%) and green (15%);  
329 yellow (2%) and red (2%) films were less frequent (Fig. 3D-F and Table S1).

330 **b. Characterization of quantity, quality and chemical composition of**  
331 **microlitter in fish stomach content**

332 Microlitter items were found in 100% *M. merluccius* specimens and in 5 out of 6 (83.3%) *M.*  
333 *barbatus* specimens (Fig. 4).

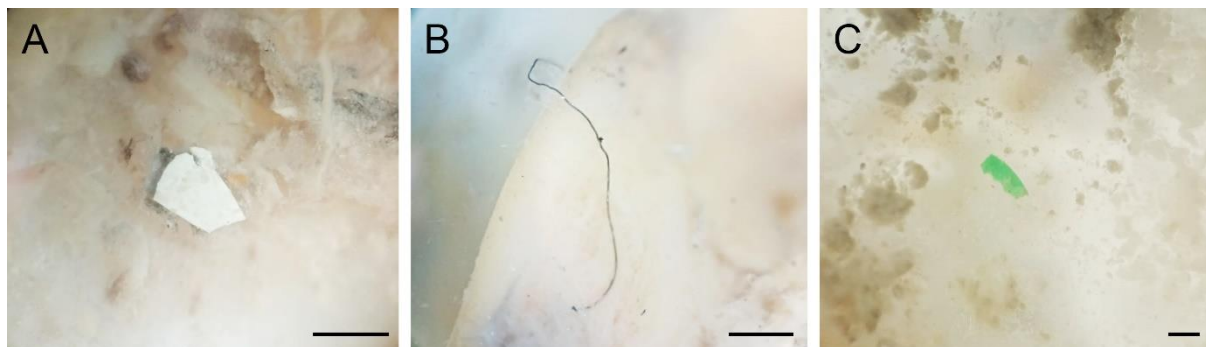

334  
335 A higher abundance of microlitter was found in the stomach contents of hakes ( $14.67 \pm 4.10$   
336 items/individual) than mullets ( $5.50 \pm 1.97$  items/individual), but the difference between group  
337 means was not statistically significant ( $t_{10}=2.045$ ,  $p=0.068$ ) (Fig. 5A).

338



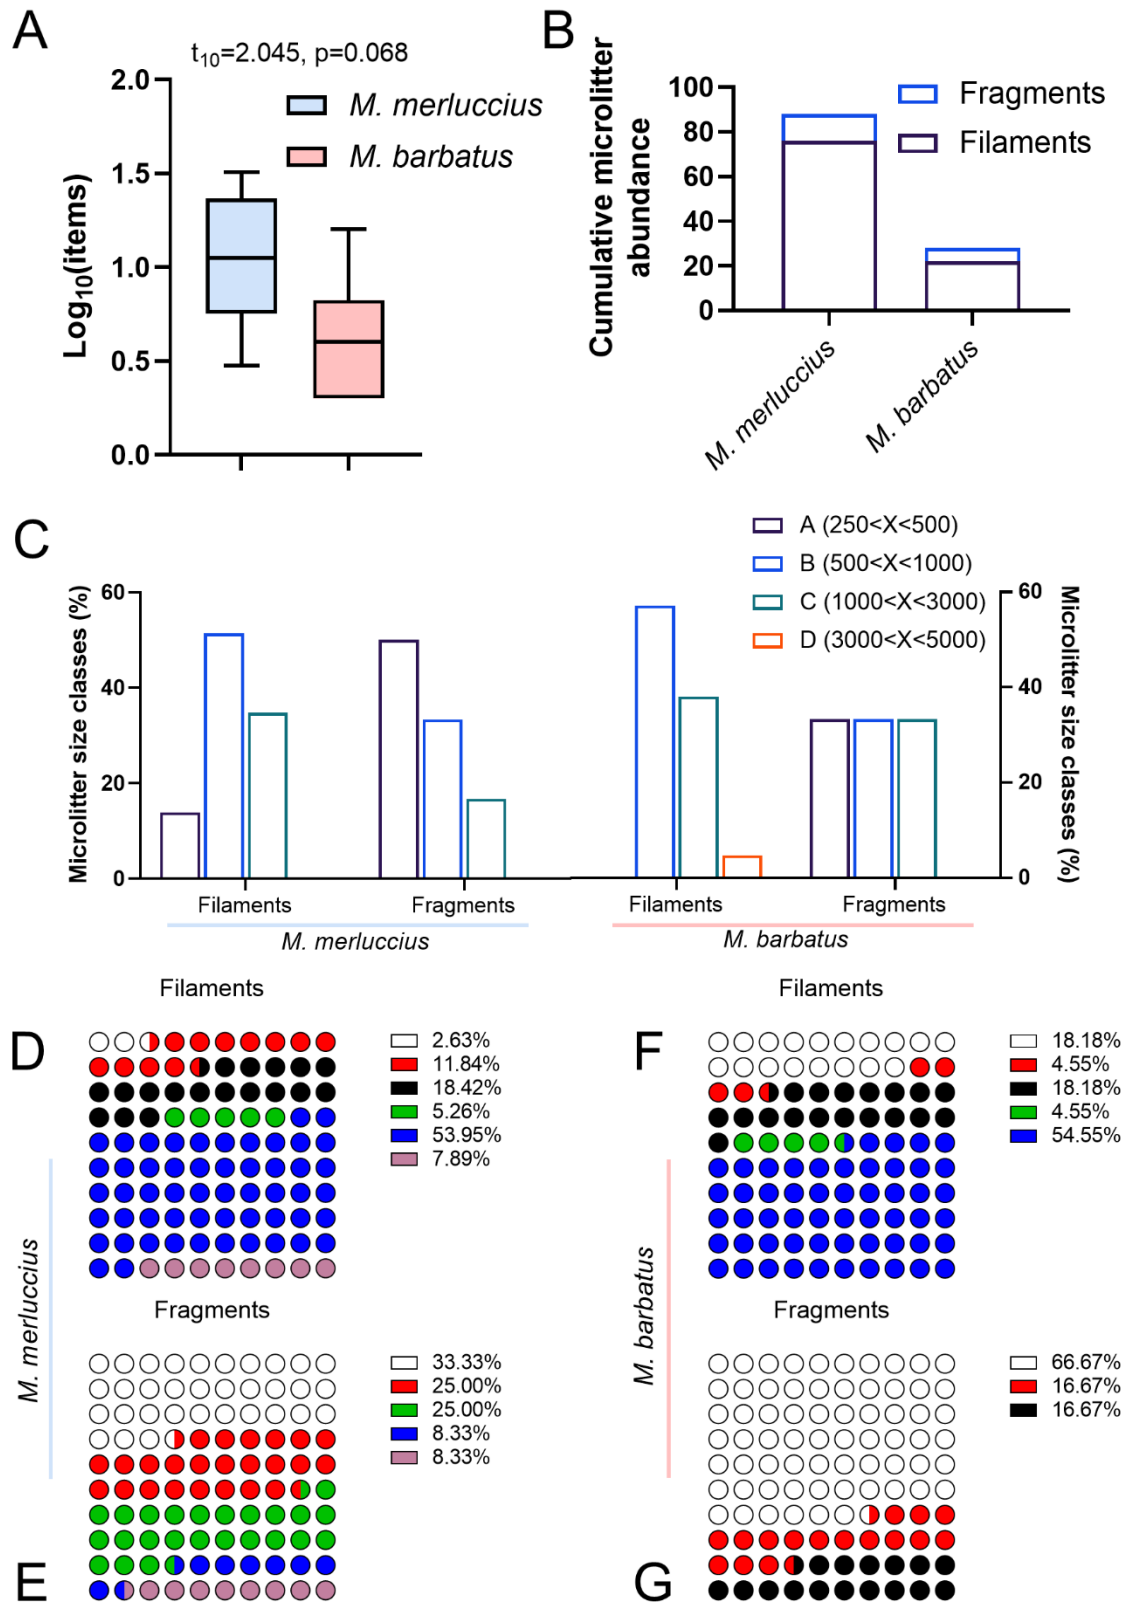

339

340 The retrieved microlitter was classified as filaments and fragments, and no films were found.

341  $12.67 \pm 4.27$  filaments and  $2 \pm 0.71$  fragments were retrieved from hakes, while  $4.33 \pm 2$

342 filaments and  $1.17 \pm 0.37$  fragments were found in mullets. Filaments were the most abundant  
343 shape type, with 76/88 particles (83.36%) in hake and 22/28 (78.57%) in mullet (Fig. 5B).  
344 *M. merluccius* ingested mostly filaments and fragments in the B and A size classes,  
345 respectively. The most represented filament size class in *M. barbatus* stomach contents was  
346 B, while fragments equally fell into the three size classes (Fig. 5C).  
347 Filaments found in the stomach contents of *M. merluccius* were generally blue (53.95%) and  
348 black (18.42%) followed by red, green, white and other colored types (all below 12%). Blue,  
349 black and green filaments were found in similar percentages also in *M. barbatus* (54.55%,  
350 18.18% and 4.55%, respectively). Microlitter fragments in hake and mullet were mostly white  
351 (33% and 66.67%, respectively) and red (25% and 16.67%, respectively); however, green,  
352 blue and other colored-fragments were retrieved only from hake, while black fragments were  
353 only found in mullet (Fig. 5D-G). Differences in microlitter stomach content by color between  
354 species was not statistically significant either for filaments ( $X^2_{(5)}=9.38$ ,  $p=0.094$ ) or fragments  
355 ( $X^2_{(5)}=5.63$ ,  $p=0.34$ ).  
356 Forty items visually classified as plastics, equaling approximately the 35% of all items  
357 retrieved, were further analyzed by  $\mu$ FT-IR for a qualitative term of reference. Samples for  
358 which a spectrum could be obtained matched exclusively to synthetic polymers: filaments  
359 exclusively matched with HDPE while fragments were identified as HDPE, polyamide and  
360 polypropylene. HDPE and polypropylene, with a cumulative identification rate of 88.8%, were  
361 the two most frequent polymers. Selected spectra obtained from a blue fragment from *M.*  
362 *barbatus*, a blue filament from *M. merluccius* and a white fragment from *M. barbatus* are  
363 presented, showing a Pearson's correlation coefficient of 0.87, 0.72 and 0.58 with reference  
364 spectra, respectively (Fig. 6 A-C).

365

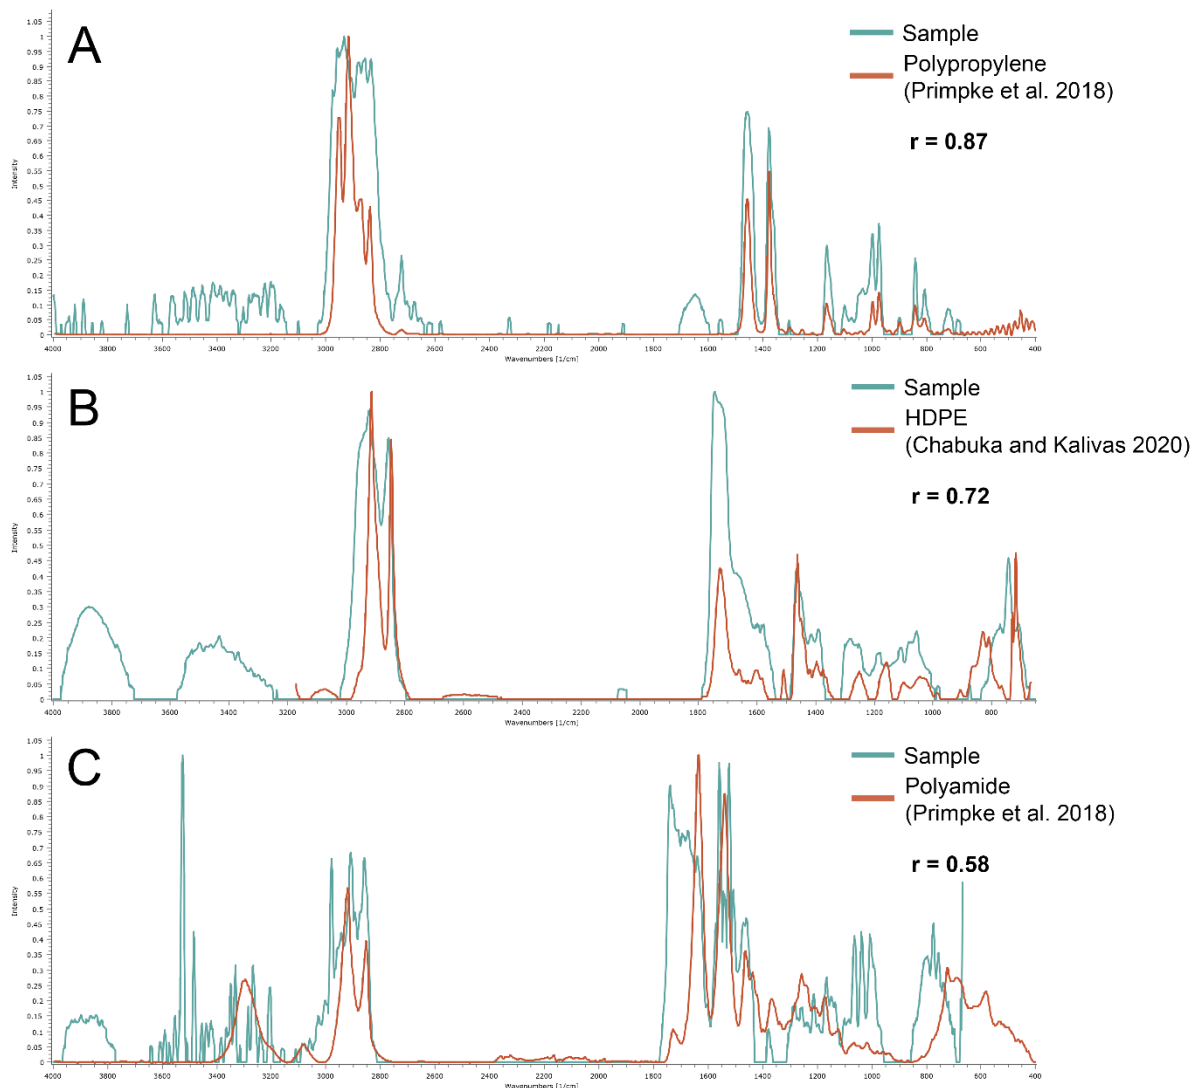

366

367

368

**c. Microlitter as carrier of biological agents to *M. merluccius* and *M. barbatus* cells**

369

370

371

372

373

To evaluate the presence of microorganisms and consequently validate the role of microlitter as carrier of biological agents, 10  $\mu$ L cell suspension from all cultures following a 72-hour incubation were qualitatively assessed by optical microscopy. Bacilliform bacteria (grey arrowheads), unicellular fungi (white arrowheads) and flagellates (black arrowheads) were observed in microlitter-exposed cells (Fig. 7 B-D) but not in control cells (Fig. 7 A).

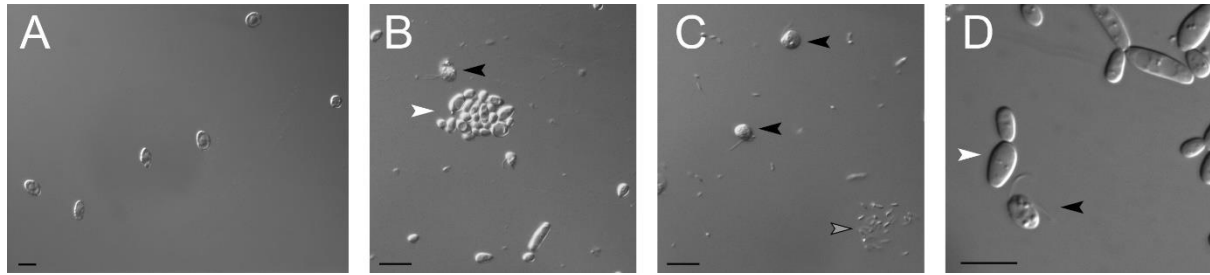

374

375 Their abundance was quantified over a 37.000  $\mu\text{m}^2$  area and normalized to 100.000  $\mu\text{m}^2$  area  
 376 per species, organ and microlitter concentration. A variable degree of biological contamination  
 377 was found in conditioned primary cultures of both species (Table 2).

| Species              | Organ       | Mean microbial count |      |       | SE microbial count |       |       | 95% CI microbial count [L;U] |              |              | Statistical test |       |    |
|----------------------|-------------|----------------------|------|-------|--------------------|-------|-------|------------------------------|--------------|--------------|------------------|-------|----|
|                      |             | ctrl                 | low  | high  | ctrl               | low   | high  | ctrl                         | low          | high         | H                | p     |    |
| <i>M. merluccius</i> | Gills       | 0                    | 269  | 241.2 | 0                  | 143.8 | 57.95 | 0;0                          | -349.8;887.8 | -8.14;490.5  | 5.609            | 0.068 | ns |
|                      | Head kidney | 0                    | 14.4 | 23.31 | 0                  | 7.00  | 3.91  | 0;0                          | -15.79;44.48 | 6.49;40.13   | 6.161            | 0.025 | *  |
|                      | Spleen      | 0                    | 8.07 | 48.42 | 0                  | 5.6   | 34.97 | 0;0                          | -16.02;32.16 | -102.0;198.9 | 5.162            | 0.1   | ns |
| <i>M. barbatus</i>   | Gills       | 0                    | 0    | 18.83 | 0                  | 0     | 4.11  | 0;0                          | 0;0          | 1.15;36.51   | 7.624            | 0.036 | *  |
|                      | Head kidney | 0                    | 0    | 17.04 | 0                  | 0     | 5.88  | 0;0                          | 0;0          | -8.26;42.34  | 7.624            | 0.036 | *  |
|                      | Spleen      | 0                    | 5.38 | 23.31 | 0                  | 5.38  | 13.92 | 0;0                          | -17.77;28.53 | -36.58;83.21 | 4.587            | 0.107 | ns |

378

379 For the hake, a significant effect of microlitter concentration on microbial counts was found  
 380 only in HK primary cultures (H statistics=6.16, p=0.025). For the mullet, statistical significance  
 381 was evidenced for microbial counts in G and HK (H statistics=7.62, p=0.036).

382

#### d. Microlitter cytotoxicity in *M. merluccius* and *M. barbatus* cells

383

384

385

Microlitter cytotoxicity was evaluated based on the viability of cells from G, HK and SPL following a 2- and a 72-hour long incubation with two concentrations of microlitter sampled by 250  $\mu\text{m}$  net tows (Fig. 8).

## *M. merluccius*

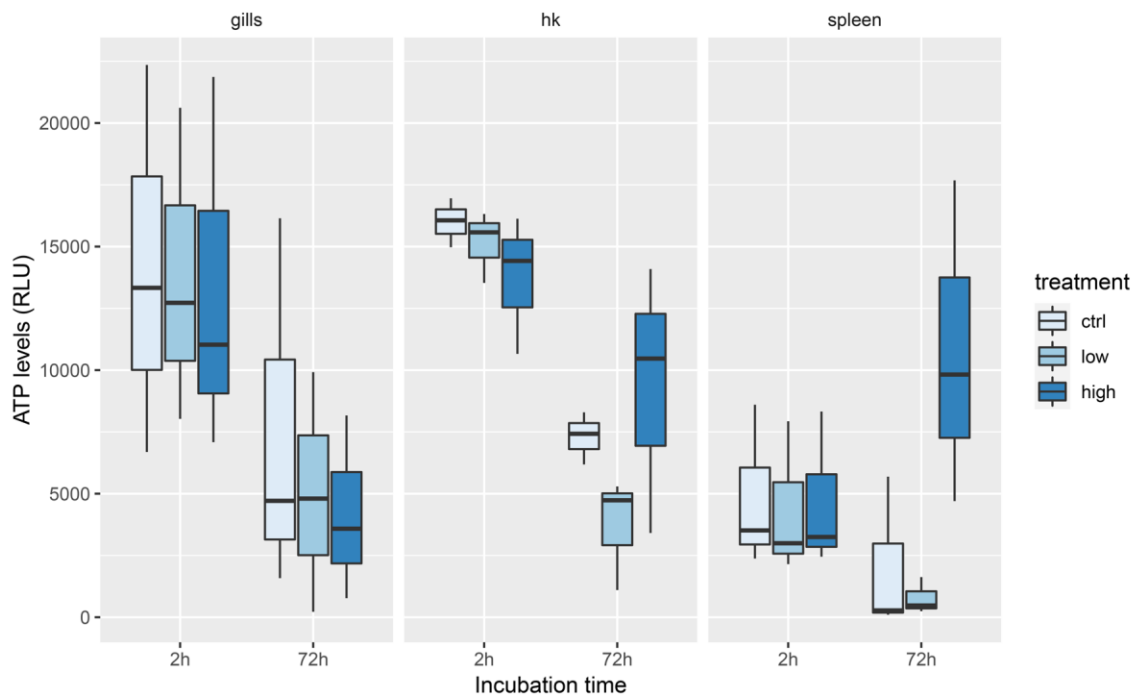

## *M. barbatus*

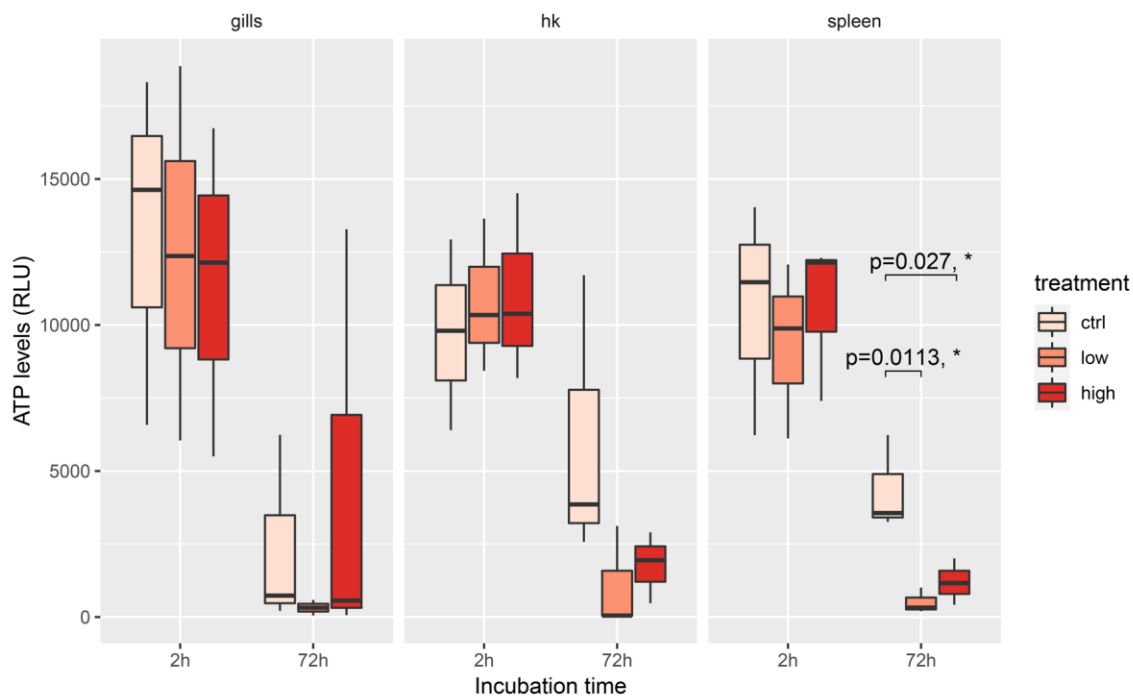

386

387 Exposure to microlitter did not induce any statistically significant decrease in intracellular ATP  
388 following the short incubation time in either species or organs (Table S3a-b).

389 In *M. merluccius*, microlitter induced a decrease in median cell viability after a 72-hour  
390 incubation in primary G cultures at the high concentration and in both HK and SPL cultures at  
391 the low concentration. The linear model fit to splenic cell culture data following the 72-hour

392 exposure explained the 62.3% of ATP levels variation, even though differences among  
393 experimental groups were slightly non-significant ( $F_{(2,6)} = 4.96$ ,  $p=0.054$ ) (Table S3a).  
394 In *M. barbatus* primary cultures from all organs, the median intracellular ATP levels were lower  
395 in the Low and High groups than in corresponding controls. Such a decrease revealed a  
396 statistically significant main effect of microlitter concentration on splenic cells ( $F_{(2,6)} = 10.8$ ,  $p$   
397  $=0.01$ ), with the overall treatment effect explaining almost 80% of ATP levels variation of the  
398 model ( $\eta^2 = 0.783$ ) (Table S3b). Pairwise comparisons between the control and the “Low” and  
399 “High” groups were statistically significant ( $p$  adjusted = 0.0113 and 0.027, respectively) (Fig.  
400 8).

#### 401        **4. Discussion**

402        In this work we applied a multidisciplinary approach combining oceanographical,  
403        spectroscopical, cellular and microscopical methods to characterize the quality and quantity  
404        of microlitter particles in the coastal surface waters and in the digestive tract of two  
405        commercially-valuable Mediterranean fish species; we also preliminarily addressed the  
406        cytotoxic potential of field-collected microlitter on primary cultures of cells extracted from  
407        mucosal (i.e. gills) and lymphoid (i.e. head kidney and spleen) organs.

408

409        The marine litter causes multiple environmental, economic, social, political and cultural  
410        impacts (Barboza et al., 2019; Galgani et al., 2019; GESAMP, 2015; UNEP, 2014), especially  
411        to the health and functioning of organisms and ecosystems (Corinaldesi et al., 2021; Garcia-  
412        Vazquez et al., 2018; Rios et al., 2007). At the European level, such pollutant was included  
413        among the 11 qualitative descriptors of the Marine Strategy Framework Directive against  
414        which the quality of the marine environment is assessed (European Parliament, 2008/56/EC).  
415        Extensive research has demonstrated the ubiquity of plastic pollution in several matrices such  
416        as beaches (Fortibuoni et al., 2021; Prevenios et al., 2018), sediments (Piazzolla et al., 2020;  
417        Renzi et al., 2018) and seawater (Atwood et al., 2019; Capriotti et al., 2021) – although remote  
418        (Cincinelli et al., 2017; Lusher et al., 2015). Microlitter was retrieved from all water samples  
419        taken within the framework of the PISCES project in a much higher (~20-fold) average  
420        concentration ( $0.30 \pm 0.02$  items  $m^{-3}$ ) than litter particles  $> 5$  mm ( $0.014 \pm 0.003$  items  $m^{-3}$ ).  
421        Keeping in mind the environmental and biological severity of litter  $< 5$  mm, our results are in  
422        good agreement with microlitter concentrations reported from other areas of the  
423        Mediterranean Sea, Yellow Sea and oceanic waters (Baini et al., 2018; Cincinelli et al., 2017;  
424        Collignon et al., 2012; Constant et al., 2018; Cózar et al., 2015; de Lucia et al., 2018, 2014;  
425        Expósito et al., 2021; Fagiano et al., 2022; Fossi et al., 2012, 2016; Kazour et al., 2019; Lusher  
426        et al., 2015; Panti et al., 2015; Suaria et al., 2016; van der Hal et al., 2017; Zhang et al., 2017;  
427        Zhao et al., 2014) (Fig. 9), suggesting that also surveys that are not extensive in either duration  
428        or sample sizes can effectively capture the extent of microlitter pollution. This is desirable to

429 minimize the impacts of research-related anthropogenic activities. An exception was  
 430 represented by the Eastern Mediterranean Sea, which appears to be much more polluted than  
 431 the western basin. We must highlight that data dispersion could not be quantified from Cózar  
 432 et al. (2015) and Constant et al. (2018) as only mean items m<sup>-3</sup> were reported, and that data  
 433 from Vasilopoulou et al. (2021) was discarded because of non-informative results (41.31 ±  
 434 112.05 mean ± SD items m<sup>-3</sup> - SD could be back-calculated from standard error because a  
 435 sample size was clearly indicated by authors).

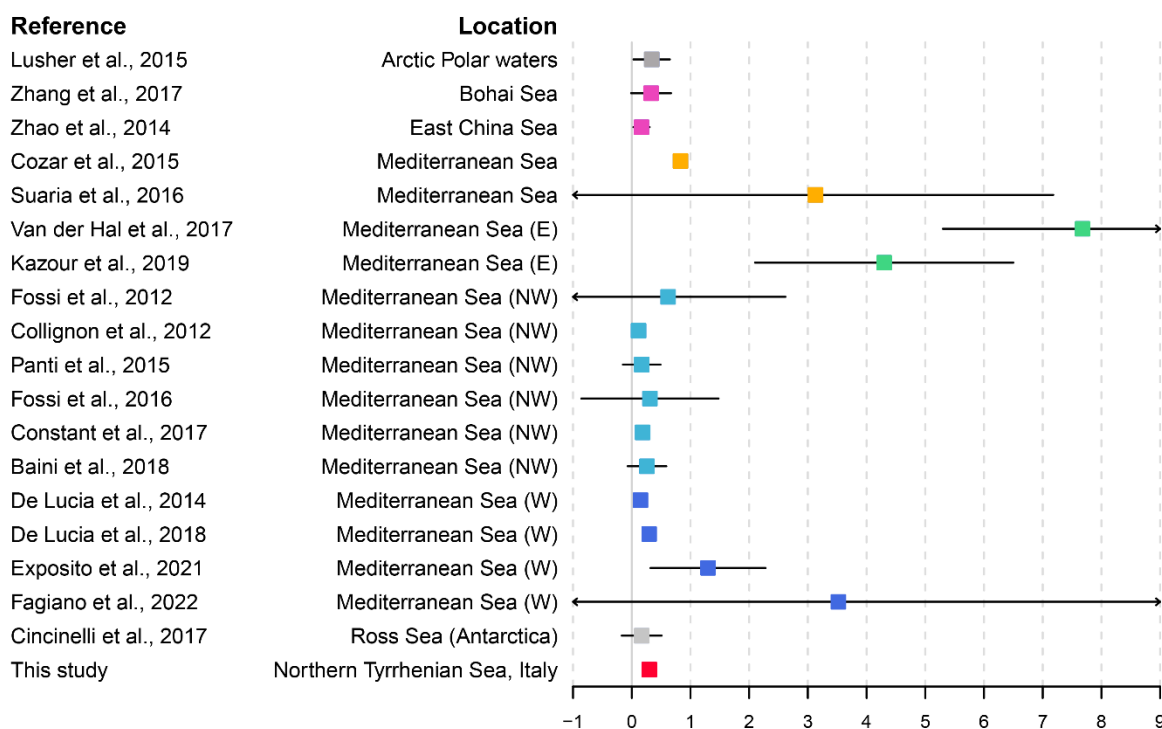

436

437

438 The relationship between the marine biota and microlitter was so far mostly evaluated by  
 439 ingestion rates (e.g. Rios-Fuster et al., 2019; Savoca et al., 2019). MPs are thought to be  
 440 mistaken for or even purposefully chosen instead of food (Clark et al., 2016; Ling et al., 2017)  
 441 probably also depending on their color (Du et al., 2021; Wright et al., 2013). The presence of  
 442 both microlitter shape types in the stomachs of *M. merluccius* and *M. barbatus* and the lack of  
 443 statistically significant differences based on the chromatic factor support the idea that  
 444 microlitter may be ingested non-selectively by these two species, even though a  
 445 biomagnification origin cannot be excluded. Hake and mullet were chosen as experimental



446 models for a variety of reasons: on one hand they are among the most targeted demersal fish  
447 species by the Mediterranean deep-sea fisheries and the two most fished target species in  
448 the shallow area of the coastal sector (Sabatella et al., 2017; Tiralongo et al., 2021); on the  
449 other, they are regarded as bioindicators of coastal marine ecosystems and display a benthic  
450 feeding behavior at a certain life stage (juvenile *M. merluccius*) or throughout the lifespan (*M.*  
451 *barbatus*) (Carrozzi et al., 2019; Esposito et al., 2014). Moreover, some authors already  
452 described the occurrence of MPs in these two species (Atamanalp et al., 2021; Avio et al.,  
453 2020, 2015; Bellas et al., 2016; Digka et al., 2018; Giani et al., 2019; Mancuso et al., 2019).  
454 Here we confirmed that microlitter ranging in size from 250 to 3000  $\mu\text{m}$  was present in the  
455 stomachs of both our target species in higher numbers compared to literature data (e.g. Avio  
456 et al., 2020; Bellas et al., 2016; Giani et al., 2019), especially for *M. Merluccius*. A reason for  
457 this may be found in an ontogenic trait of the species, for which a shift from benthic towards  
458 pelagic and necto-benthic feeding habits was demonstrated to occur over a TL of 18 cm, and  
459 in the fact that a greater microlitter contamination is usually observed in sediments than water  
460 column. Benthic macrolitter in the area was recently described quali-quantitatively, with the  
461 most abundant categories being ascribed to plastic (Mancini et al., 2021); MPs were also  
462 demonstrated to abound in superficial sediments in the study area (Piazzolla et al., 2020). The  
463 most commonly ingested microlitter items were confirmed by  $\mu\text{FT-IR}$  as high density  
464 polyethylene, polyamide and polypropylene (Chabuka and Kalivas, 2020; Primpke et al.,  
465 2018). On this, we must specify that a small number of spectra could be identified with certainty  
466 due to poor signal quality caused by the saturation of the detector (i.e. large sample size), or  
467 significant degradation of the plastic items likely caused by stomach acids. More importantly,  
468 we call the attention on the fact that such synthetic polymers were also demonstrated in marine  
469 sediments (Piazzolla et al., 2020) and in the atmosphere (Lucci et al., 2021) of the same area,  
470 pointing to the high and pervasive dispersion of anthropogenic litter across multiple  
471 environmental compartments.

472

473 It is known that MPs act as a carrier of biological agents (Amaral-Zettler, 2019; Kiessling et  
474 al., 2015), and our data confirmed this (Fig. 7). Because a dedicated experiment aimed at  
475 molecular taxonomy could not be set up due to limited availability of microorganisms on  
476 microlitter, flagellates were classified on phenotypic properties. Based on flagellar features  
477 and because they are extremely common in marine plankton, where they can be found free-  
478 swimming or attached to bacterial mats or other surfaces, we hypothesize they may belong to  
479 the *Paraphysomonas* or *Spumella* genus or to the aloricate Bicosoecida order. Microbial  
480 composition has the ability to condition the fate of MPs in the water column and sediments  
481 (Rogers et al., 2020). Once the microlitter is ingested, its associated microorganisms may  
482 colonize the gastrointestinal tract of the host, possibly affecting its welfare: in fact, harmful  
483 microorganisms, including potential human and animal pathogens, were found associated to  
484 litter (Zettler et al., 2013) and, according to data from Zwollo et al. (2021), serious  
485 consequences may arise due to the reduced ability to respond adequately to pathogens  
486 because of suboptimal humoral immune responses.

487

488 Research aimed at also elucidating physiological impacts of MPs have exposed fish to pristine  
489 commercially-available particles under controlled laboratory conditions. Their bioavailability  
490 was demonstrated and effects such as altered feeding behavior, metabolic disorders, energy  
491 depletion, growth impairment, delayed development, compromised immune response,  
492 reproduction and lifespan were reported (Botterell et al., 2019; Espinosa et al., 2019, 2017;  
493 Guerrero et al., 2021; Mazurais et al., 2015; Rios-Fuster et al., 2021; Sendra et al., 2021; Yong  
494 et al., 2020).

495 Recently, beach-sampled microlitter was employed in *in vivo* experiments on the European  
496 sea bass *Dicentrarchus labrax* (Zitouni et al., 2021) and medaka *Oryzias latipes* (Pannetier et  
497 al., 2020) to investigate survival, development, uptake, oxidative stress and genotoxicity  
498 following the administration of a microlitter-spiked feed. Their results showed the ability of  
499 environmental MPs to i) accumulate in fish organs, ii) significantly affect the activity of  
500 enzymes involved in the antioxidant defense system and iii) induce DNA damages following

501 acute exposures. HK primary cultures were also employed to explore the impacts of non-  
502 environmental MPs on the abundance and antibody response of B cells in rainbow trout  
503 (Zwollo et al., 2021): a lower rate of B cell development together with reduced expression of  
504 Ig heavy chain genes were found, suggesting that not only innate but also adaptive immunity  
505 may be threatened by such an emerging contaminant.

506 Despite some similarities with the three just-mentioned studies may be perceived, we must  
507 highlight that no other research has ever investigated the apical cytotoxicity event in primary  
508 cell cultures derived from fish mucosal and lymphoid organs following their exposure to  
509 microlitter collected in the same area from where animals were sampled (literature search  
510 conducted on Web of Science on December 3 , 2021). The primary organs for examining the  
511 cytotoxic effects of microlitter would have been the stomach or intestine, but the methods for  
512 cell extraction are difficult, lengthy, prone to contamination and poor in yield, which were all  
513 incompatible factors with our experimental design. Keeping in mind that microlitter and MP  
514 impacts occur via cell internalization or chemical contamination and that the former mode of  
515 action was not expectable due to the large size of particles employed, we investigated  
516 additional immunologically-relevant organs that could be reached by the release of chemical  
517 contaminants contained by or adsorbed on the microlitter particles, and affected in their  
518 physiological status. We believe that our results, obtained in an attempt to bridge the fields of  
519 biological oceanography and experimental toxicology, are biologically significant and actual  
520 because i) microlitter particles and fish specimens originated from the same sampling site, ii)  
521 microlitter cytotoxicity was measured by the well-established, highly-sensitive and  
522 unambiguous direct luciferase-based quantification of cellular ATP (Cree and Andreotti, 1997;  
523 Mahto et al., 2010) iii) primary cultures were obtained from organs that are key in ensuring  
524 immune barrier and competency and iv) the suitability of the strategy for testing for MP toxicity  
525 was overall demonstrated and recently reviewed in details (Revel et al., 2021). In addition, fish  
526 have been increasingly established as experimental models in the fields of biomedical  
527 sciences and toxicology because they share many similarities with higher vertebrates  
528 immunology-wise (Miccoli et al., 2021a; Scapigliati et al., 2018).

529 Taking into account cytotoxicity data (Fig. 8) and the lack of statistically different microbial  
530 counts observed within *M. barbatus* spleen cultures (Table 2), splenic cell subpopulations  
531 appeared to be the most sensitive to microlitter exposures among all investigated organs. No  
532 further reduction in ATP levels were seen in the High compared to the Low condition,  
533 suggesting that such a pollutant can impact cell viability already at concentrations that are in  
534 line with estimates modelled over the next three decades. These results are concerning  
535 because spleen, together with thymus and kidney, is the major lymphoid organ of teleosts in  
536 which adaptive immune responses are mounted (Flajnik, 2018; Zapata et al., 2006). Neither  
537 the physiological endpoints reported in the large majority of scientific literature nor our results  
538 herein presented provide insight into the molecular mechanisms underlying microlitter toxicity  
539 pathways, but inform about apical events manifested either by the whole organism or primary  
540 cell cultures, respectively. However, the novelty of our approach was to provide data on a  
541 lower, possibly more predictive, level of biological organization (cellular vs. organismal) by  
542 means of so-called New Approach Methodologies, which heavily rely on *in vitro* testing. This  
543 is compliant with the 3Rs principle in animal testing, in addition to having been validated by  
544 the latest internationally-agreed test guidelines (OECD, 2021) and supported by regulatory  
545 toxicology roadmaps (e.g. [EPA's strategic vision](#)).

546

## 547 **5. Conclusions**

548 In conclusion, the present study has investigated the anthropogenic litter in the coastal  
549 epipelagic Northern Tyrrhenian Sea and the stomach of two commercially-relevant fish  
550 species, validated the microlitter fraction as a carrier of biological agents and, for the first time,  
551 demonstrated that splenic cell viability is negatively affected following exposure to such a  
552 contaminant. Future investigations with larger sample sizes, primary or continuous cell  
553 cultures from additional organs and more in-depth methodological approaches are warranted  
554 for clarifying the susceptibility of *Merluccius merluccius* and *Mullus barbatus* to anthropogenic  
555 microlitter.

556 **6. Author contribution**

557 AM: Conceptualization, Funding acquisition, Data curation, Formal analysis, Visualization,  
558 Supervision, Project administration, Writing - original draft, Writing - review.

559 EM: Conceptualization, Funding acquisition, Investigation, Writing - Review & Editing.

560 PRS: Methodology, Investigation, Writing - original draft, Writing - Review & Editing.

561 GDV: Methodology, Resources, Writing - Review & Editing.

562 GS: Resources, Supervision, Writing - Review & Editing.

563 SP: Supervision, Writing - Review & Editing

564

565 **7. Acknowledgements**

566 This research was funded by the “PISCES” project (FEAMP PO 2014–2020 promoted by  
567 Lazio Region, Italy) and the “Departments of Excellence-2018” Program (Dipartimenti di  
568 Eccellenza) of the Italian Ministry of Education, University and Research awarded to the  
569 DIBAF Department of University of Tuscia. AM and EM are extremely thankful to the “Marinai  
570 & Caratisti” Cooperative of Civitavecchia and to Dr. Roberto Arciprete for their support in all  
571 sampling operations. Financial support to GDV was provided by the Grant to Department of  
572 Science, Roma Tre University (MIUR-Italy Dipartimenti di Eccellenza, ARTICOLO 1, COMMI  
573 314-337 LEGGE 232/2016). Dr. Daniele Piazzolla of the Laboratory of Experimental  
574 Oceanology and Marine Ecology (University of Tuscia) is acknowledged for his contribution to  
575 the PISCES project. AM wishes to thank Prof. Pierangelo Luporini (University of Camerino)  
576 for his valuable input on flagellate taxonomy.

577

578 **8. References**

579 Amaral-Zettler, L., 2019. Plastics: Colonization and Degradation, in: Reference Module in Life  
580 Sciences. Elsevier. doi:10.1016/B978-0-12-809633-8.90685-X

581 Amelia, T.S.M., Khalik, W.M.A.W.M., Ong, M.C., Shao, Y.T., Pan, H.-J., Bhubalan, K., 2021. Marine  
582 microplastics as vectors of major ocean pollutants and its hazards to the marine ecosystem and  
583 humans. Prog. Earth Planet. Sci. 8, 12. doi:10.1186/s40645-020-00405-4

- 584 Association of Plastic Manufacturers, 2020. Plastics - the Facts 2020 - An analysis of European  
585 plastics production, demand and waste data.
- 586 Atamanalp, M., Köktürk, M., Uçar, A., Duyar, H.A., Özdemir, S., Parlak, V., Esenbuğa, N., Alak, G.,  
587 2021. Microplastics in Tissues (Brain, Gill, Muscle and Gastrointestinal) of *Mullus barbatus* and  
588 *Alosa immaculata*. Arch. Environ. Contam. Toxicol. 81, 460–469. doi:10.1007/s00244-021-  
589 00885-5
- 590 Atwood, E.C., Falcieri, F.M., Piehl, S., Bochow, M., Matthies, M., Franke, J., Carniel, S., Sclavo, M.,  
591 Laforsch, C., Siebert, F., 2019. Coastal accumulation of microplastic particles emitted from the  
592 Po River, Northern Italy: Comparing remote sensing and hydrodynamic modelling with in situ  
593 sample collections. Mar. Pollut. Bull. 138, 561–574. doi:10.1016/j.marpolbul.2018.11.045
- 594 Avio, C.G., Gorbi, S., Regoli, F., 2015. Experimental development of a new protocol for extraction and  
595 characterization of microplastics in fish tissues: First observations in commercial species from  
596 Adriatic Sea. Mar. Environ. Res. 111, 18–26. doi:10.1016/j.marenvres.2015.06.014
- 597 Avio, C.G., Pittura, L., D’Errico, G., Abel, S., Amorello, S., Marino, G., Gorbi, S., Regoli, F., 2020.  
598 Distribution and characterization of microplastic particles and textile microfibers in Adriatic food  
599 webs: General insights for biomonitoring strategies. Environ. Pollut. 258, 113766.  
600 doi:10.1016/j.envpol.2019.113766
- 601 Baini, M., Fossi, M.C., Galli, M., Caliani, I., Campani, T., Finoia, M.G., Panti, C., 2018. Abundance  
602 and characterization of microplastics in the coastal waters of Tuscany (Italy): The application of  
603 the MSFD monitoring protocol in the Mediterranean Sea. Mar. Pollut. Bull. 133, 543–552.  
604 doi:10.1016/J.MARPOLBUL.2018.06.016
- 605 Barboza, L.G.A., Cózar, A., Gimenez, B.C.G., Barros, T.L., Kershaw, P.J., Guilhermino, L., 2019.  
606 Macroplastics Pollution in the Marine Environment, in: Shepperd, C. (Ed.), World Seas: An  
607 Environmental Evaluation. Elsevier, pp. 305–328. doi:10.1016/B978-0-12-805052-1.00019-X
- 608 Bellas, J., Martínez-Armental, J., Martínez-Cámara, A., Besada, V., Martínez-Gómez, C., 2016.  
609 Ingestion of microplastics by demersal fish from the Spanish Atlantic and Mediterranean coasts.  
610 Mar. Pollut. Bull. 109, 55–60. doi:10.1016/j.marpolbul.2016.06.026
- 611 Bessa, F., Centre, E.S., Lusher, A., 2019. Harmonized protocol for monitoring microplastics in biota.  
612 JPI-Oceans BASEMAN project. doi:10.13140/RG.2.2.28588.72321/1
- 613 Botterell, Z.L.R., Beaumont, N., Dorrington, T., Steinke, M., Thompson, R.C., Lindeque, P.K., 2019.

- 614 Bioavailability and effects of microplastics on marine zooplankton: A review. *Environ. Pollut.* 245,  
615 98–110. doi:10.1016/j.envpol.2018.10.065
- 616 Capriotti, M., Cocci, P., Bracchetti, L., Cottone, E., Scandiffio, R., Caprioli, G., Sagratini, G., Mosconi,  
617 G., Bovolin, P., Palermo, F.A., 2021. Microplastics and their associated organic pollutants from  
618 the coastal waters of the central Adriatic Sea (Italy): Investigation of adipogenic effects in vitro.  
619 *Chemosphere* 263, 128090. doi:10.1016/j.chemosphere.2020.128090
- 620 Carrozzi, V., Di Lorenzo, M., Massi, D., Titone, A., Ardizzone, G., Colloca, F., 2019. Prey preferences  
621 and ontogenetic diet shift of European hake *Merluccius merluccius* (Linnaeus, 1758) in the  
622 central Mediterranean Sea. *Reg. Stud. Mar. Sci.* 25, 100440. doi:10.1016/j.rsma.2018.100440
- 623 Caruso, G., 2019. Microplastics as vectors of contaminants. *Mar. Pollut. Bull.* 146, 921–924.  
624 doi:10.1016/j.marpolbul.2019.07.052
- 625 Casabianca, S., Capellacci, S., Giacobbe, M.G., Dell’Aversano, C., Tartaglione, L., Varriale, F.,  
626 Narizzano, R., Risso, F., Moretto, P., Dagnino, A., Bertolotto, R., Barbone, E., Ungaro, N.,  
627 Penna, A., 2019. Plastic-associated harmful microalgal assemblages in marine environment.  
628 *Environ. Pollut.* 244, 617–626. doi:10.1016/j.envpol.2018.09.110
- 629 Chabuka, B.K., Kalivas, J.H., 2020. Application of a Hybrid Fusion Classification Process for  
630 Identification of Microplastics Based on Fourier Transform Infrared Spectroscopy. *Appl.*  
631 *Spectrosc.* 74, 1167–1183. doi:10.1177/0003702820923993
- 632 Cincinelli, A., Scopetani, C., Chelazzi, D., Lombardini, E., Martellini, T., Katsoyiannis, A., Fossi, M.C.,  
633 Corsolini, S., 2017. Microplastic in the surface waters of the Ross Sea (Antarctica): Occurrence,  
634 distribution and characterization by FTIR. *Chemosphere* 175, 391–400.  
635 doi:10.1016/j.chemosphere.2017.02.024
- 636 Clark, J.R., Cole, M., Lindeque, P.K., Fileman, E., Blackford, J., Lewis, C., Lenton, T.M., Galloway,  
637 T.S., 2016. Marine microplastic debris: a targeted plan for understanding and quantifying  
638 interactions with marine life. *Front. Ecol. Environ.* 14, 317–324. doi:10.1002/fee.1297
- 639 Clementi, E., Aydogdu, A., Goglio, A.C., Pistoia, J., Escudier, R., Drudi, M., Grandi, A., Mariani, A.,  
640 Lyubartsev, V., Lecci, R., Cretí, S., Coppini, G., Masina, S., Pinardi, N., 2021. Mediterranean  
641 Sea Physical Analysis and Forecast (CMEMS MED-Currents, EAS6 system) (Version 1) [Data  
642 set]. Copernicus Monitoring Environment Marine Service (CMEMS).  
643 doi:10.25423/CMCC/MEDSEA\_ANALYSISFORECAST\_PHY\_006\_013\_EAS6

- 644 Cole, M., Lindeque, P., Fileman, E., Halsband, C., Galloway, T.S., 2015. The Impact of Polystyrene  
645 Microplastics on Feeding, Function and Fecundity in the Marine Copepod *Calanus*  
646 *helgolandicus*. *Environ. Sci. Technol.* 49, 1130–1137. doi:10.1021/es504525u
- 647 Cole, M., Lindeque, P., Fileman, E., Halsband, C., Goodhead, R., Moger, J., Galloway, T.S., 2013.  
648 Microplastic Ingestion by Zooplankton. *Environ. Sci. Technol.* 47, 6646–6655.  
649 doi:10.1021/es400663f
- 650 Collignon, A., Hecq, J.H., Glagani, F., Voisin, P., Collard, F., Goffart, A., 2012. Neustonic microplastic  
651 and zooplankton in the North Western Mediterranean Sea. *Mar. Pollut. Bull.*  
652 doi:10.1016/j.marpolbul.2012.01.011
- 653 Constant, M., Kerherve, P., Sola, J., Sanchez-Vidal, A., Canals, M., Heussner, S., 2018. Floating  
654 Microplastics in the Northwestern Mediterranean Sea: Temporal and Spatial Heterogeneities, in:  
655 M., C., Di Pace, E., Errico, M., Gentile, G., Montarsolo, A., Mossotti, R. (Eds.), *Proceedings of*  
656 *the International Conference on Microplastic Pollution in the Mediterranean Sea*. pp. 9–15.  
657 doi:10.1007/978-3-319-71279-6\_2
- 658 Corinaldesi, C., Canensi, S., Dell'Anno, A., Tangherlini, M., Di Capua, I., Varrella, S., Willis, T.J.,  
659 Cerrano, C., Danovaro, R., 2021. Multiple impacts of microplastics can threaten marine habitat-  
660 forming species. *Commun. Biol.* 4, 1–13. doi:10.1038/s42003-021-01961-1
- 661 Cowger, W., Steinmetz, Z., Gray, A., Munno, K., Lynch, J., Hapich, H., Primpke, S., De Frond, H.,  
662 Rochman, C., Herodotou, O., 2021. Microplastic Spectral Classification Needs an Open Source  
663 Community: Open Specy to the Rescue! *Anal. Chem.* 93, 7543–7548.  
664 doi:10.1021/acs.analchem.1c00123
- 665 Cózar, A., Sanz-Martín, M., Martí, E., González-Gordillo, J.I., Ubeda, B., Gálvez, J.Á., Irigoien, X.,  
666 Duarte, C.M., 2015. Plastic Accumulation in the Mediterranean Sea. *PLoS One* 10, e0121762.  
667 doi:10.1371/journal.pone.0121762
- 668 Cree, I.A., Andreotti, P.E., 1997. Measurement of cytotoxicity by ATP-based luminescence assay in  
669 primary cell cultures and cell lines. *Toxicol. Vitro.* 11, 553–556. doi:10.1016/S0887-  
670 2333(97)00060-X
- 671 de Lucia, G.A., Caliani, I., Marra, S., Camedda, A., Coppa, S., Alcaro, L., Campani, T., Giannetti, M.,  
672 Coppola, D., Cicero, A.M., Panti, C., Bainsi, M., Guerranti, C., Marsili, L., Massaro, G., Fossi,  
673 M.C., Matiddi, M., 2014. Amount and distribution of neustonic micro-plastic off the western



- 674 Sardinian coast (Central-Western Mediterranean Sea). *Mar. Environ. Res.* 100, 10–16.  
675 doi:10.1016/j.marenvres.2014.03.017
- 676 de Lucia, G.A., Vianello, A., Camedda, A., Vani, D., Tomassetti, P., Coppa, S., Palazzo, L., Amici, M.,  
677 Romanelli, G., Zampetti, G., Cicero, A.M., Carpentieri, S., Di Vito, S., Matiddi, M., 2018. Sea  
678 water contamination in the Vicinity of the Italian minor islands caused by microplastic pollution.  
679 *Water (Switzerland)* 10. doi:10.3390/w10081108
- 680 Digka, N., Tsangaris, C., Torre, M., Anastasopoulou, A., Zeri, C., 2018. Microplastics in mussels and  
681 fish from the Northern Ionian Sea. *Mar. Pollut. Bull.* 135, 30–40.  
682 doi:10.1016/j.marpolbul.2018.06.063
- 683 Du, S., Zhu, R., Cai, Y., Xu, N., Yap, P.-S., Zhang, Yunhai, He, Y., Zhang, Yongjun, 2021.  
684 Environmental fate and impacts of microplastics in aquatic ecosystems: a review. *RSC Adv.* 11,  
685 15762–15784. doi:10.1039/D1RA00880C
- 686 Espinosa, C., Cuesta, A., Esteban, M.Á., 2017. Effects of dietary polyvinylchloride microparticles on  
687 general health, immune status and expression of several genes related to stress in gilthead  
688 seabream (*Sparus aurata* L.). *Fish Shellfish Immunol.* 68, 251–259.  
689 doi:10.1016/j.fsi.2017.07.006
- 690 Espinosa, C., Esteban, M.Á., Cuesta, A., 2019. Dietary administration of PVC and PE microplastics  
691 produces histological damage, oxidative stress and immunoregulation in European sea bass  
692 (*Dicentrarchus labrax* L.). *Fish Shellfish Immunol.* 95, 574–583. doi:10.1016/j.fsi.2019.10.072
- 693 Esposito, V., Andaloro, F., Bianca, D., Natalotto, A., Romeo, T., Scotti, G., Castriota, L., 2014. Diet  
694 and prey selectivity of the red mullet, *Mullus barbatus* (Pisces: Mullidae), from the southern  
695 Tyrrhenian Sea: the role of the surf zone as a feeding ground. *Mar. Biol. Res.* 10, 167–178.  
696 doi:10.1080/17451000.2013.797585
- 697 Expósito, N., Rovira, J., Sierra, J., Folch, J., Schuhmacher, M., 2021. Microplastics levels, size,  
698 morphology and composition in marine water, sediments and sand beaches. Case study of  
699 Tarragona coast (western Mediterranean). *Sci. Total Environ.*  
700 doi:10.1016/j.scitotenv.2021.147453
- 701 Fagiano, V., Alomar, C., Compa, M., Soto-Navarro, J., Jordá, G., Deudero, S., 2022. Neustonic  
702 microplastics and zooplankton in coastal waters of Cabrera Marine Protected Area (Western  
703 Mediterranean Sea). *Sci. Total Environ.* 804, 150120. doi:10.1016/J.SCITOTENV.2021.150120

- 704 Flajnik, M.F., 2018. A cold-blooded view of adaptive immunity. *Nat. Rev. Immunol.* 18, 438–453.  
705 doi:10.1038/s41577-018-0003-9
- 706 Fortibuoni, T., Amadesi, B., Vlachogianni, T., 2021. Composition and abundance of macrolitter along  
707 the Italian coastline: The first baseline assessment within the European Marine Strategy  
708 Framework Directive. *Environ. Pollut.* 268, 115886. doi:10.1016/j.envpol.2020.115886
- 709 Fossi, M.C., Marsili, L., Bainsi, M., Giannetti, M., Coppola, D., Guerranti, C., Caliani, I., Minutoli, R.,  
710 Lauriano, G., Finoia, M.G., Rubegni, F., Panigada, S., Bérubé, M., Urbán Ramírez, J., Panti, C.,  
711 2016. Fin whales and microplastics: The Mediterranean Sea and the Sea of Cortez scenarios.  
712 *Environ. Pollut.* 209, 68–78. doi:10.1016/j.envpol.2015.11.022
- 713 Fossi, M.C., Panti, C., Bainsi, M., Lavers, J.L., 2018. A Review of Plastic-Associated Pressures:  
714 Cetaceans of the Mediterranean Sea and Eastern Australian Shearwaters as Case Studies.  
715 *Front. Mar. Sci.* 5. doi:10.3389/fmars.2018.00173
- 716 Fossi, M.C., Panti, C., Guerranti, C., Coppola, D., Giannetti, M., Marsili, L., Minutoli, R., 2012. Are  
717 baleen whales exposed to the threat of microplastics? A case study of the Mediterranean fin  
718 whale (*Balaenoptera physalus*). *Mar. Pollut. Bull.* 64, 2374–2379.  
719 doi:10.1016/j.marpolbul.2012.08.013
- 720 Galgani, L., Beiras, R., Galgani, F., Panti, C., Borja, A., 2019. Editorial: Impacts of Marine Litter. *Front.*  
721 *Mar. Sci.* 6. doi:10.3389/fmars.2019.00208
- 722 Garcia-Vazquez, E., Cani, A., Diem, A., Ferreira, C., Geldhof, R., Marquez, L., Molloy, E., Perché, S.,  
723 2018. Leave no traces – Beached marine litter shelters both invasive and native species. *Mar.*  
724 *Pollut. Bull.* 131, 314–322. doi:10.1016/j.marpolbul.2018.04.037
- 725 GESAMP, 2015. Sources, fate and effects of microplastics in the marine environment: a global  
726 assessment, IMO/FAO/UN. ed, Rep. Stud. GESAMP.
- 727 Giani, D., Bainsi, M., Galli, M., Casini, S., Fossi, M.C., 2019. Microplastics occurrence in edible fish  
728 species (*Mullus barbatus* and *Merluccius merluccius*) collected in three different geographical  
729 sub-areas of the Mediterranean Sea. *Mar. Pollut. Bull.* 140, 129–137.  
730 doi:10.1016/j.marpolbul.2019.01.005
- 731 Gomiero, A., Strafella, P., Pellini, G., Salvalaggio, V., Fabi, G., 2018. Comparative Effects of Ingested  
732 PVC Micro Particles With and Without Adsorbed Benzo(a)pyrene vs. Spiked Sediments on the  
733 Cellular and Sub Cellular Processes of the Benthic Organism *Hediste diversicolor*. *Front. Mar.*

- 734 Sci. 5. doi:10.3389/fmars.2018.00099
- 735 Guerrero, M.C., Aragona, M., Porcino, C., Fazio, F., Laurà, R., Levanti, M., Montalbano, G., Germanà,  
736 G., Abbate, F., Germanà, A., 2021. Micro and Nano Plastics Distribution in Fish as Model  
737 Organisms: Histopathology, Blood Response and Bioaccumulation in Different Organs. Appl.  
738 Sci. 11, 5768. doi:10.3390/app11135768
- 739 Guo, X., Wang, J., 2019. The chemical behaviors of microplastics in marine environment: A review.  
740 Mar. Pollut. Bull. 142, 1–14. doi:10.1016/j.marpolbul.2019.03.019
- 741 Isobe, A., Iwasaki, S., Uchida, K., Tokai, T., 2019. Abundance of non-conservative microplastics in the  
742 upper ocean from 1957 to 2066. Nat. Commun. 10, 1–3. doi:10.1038/s41467-019-08316-9
- 743 Jambeck, J.R., Geyer, R., Wilcox, C., Siegler, T.R., Perryman, M., Andrady, A., Narayan, R., Law,  
744 K.L., 2015. Plastic waste inputs from land into the ocean. Science (80-. ). 347, 768–771.  
745 doi:10.1126/science.1260352
- 746 Kazour, M., Jemaa, S., Issa, C., Khalaf, G., Amara, R., 2019. Microplastics pollution along the  
747 Lebanese coast (Eastern Mediterranean Basin): Occurrence in surface water, sediments and  
748 biota samples. Sci. Total Environ. doi:10.1016/j.scitotenv.2019.133933
- 749 Kiessling, T., Gutow, L., Thiel, M., 2015. Marine Litter as Habitat and Dispersal Vector, in: Marine  
750 Anthropogenic Litter. Springer International Publishing, Cham, pp. 141–181. doi:10.1007/978-3-  
751 319-16510-3\_6
- 752 Kowalski, N., Reichardt, A.M., Waniek, J.J., 2016. Sinking rates of microplastics and potential  
753 implications of their alteration by physical, biological, and chemical factors. Mar. Pollut. Bull. 109,  
754 310–319. doi:10.1016/j.marpolbul.2016.05.064
- 755 Ling, S.D., Sinclair, M., Levi, C.J., Reeves, S.E., Edgar, G.J., 2017. Ubiquity of microplastics in  
756 coastal seafloor sediments. Mar. Pollut. Bull. 121, 104–110.  
757 doi:10.1016/j.marpolbul.2017.05.038
- 758 Llorca, M., Álvarez-Muñoz, D., Ábalos, M., Rodríguez-Mozaz, S., Santos, L.H.M.L.M., León, V.M.,  
759 Campillo, J.A., Martínez-Gómez, C., Abad, E., Farré, M., 2020. Microplastics in Mediterranean  
760 coastal area: toxicity and impact for the environment and human health. Trends Environ. Anal.  
761 Chem. 27, e00090. doi:10.1016/j.teac.2020.e00090
- 762 Löhr, A., Savelli, H., Beunen, R., Kalz, M., Ragas, A., Van Belleghem, F., 2017. Solutions for global  
763 marine litter pollution. Curr. Opin. Environ. Sustain. 28, 90–99. doi:10.1016/j.cosust.2017.08.009

- 764 Lu, Y., Yuan, J., Lu, X., Su, C., Zhang, Y., Wang, C., Cao, X., Li, Q., Su, J., Ittekkot, V., Garbutt, R.A.,  
765 Bush, S., Fletcher, S., Wagey, T., Kachur, A., Sweijd, N., 2018. Major threats of pollution and  
766 climate change to global coastal ecosystems and enhanced management for sustainability.  
767 Environ. Pollut. 239, 670–680. doi:10.1016/j.envpol.2018.04.016
- 768 Lucci, F., Della Ventura, G., Piazzolla, D., Venettacci, C., Terribili, A., La Bella, C., Conte, A., Scanu,  
769 S., Bonamano, S., Radica, F., Marcelli, M., 2021. Development and testing for a low-cost device  
770 for airborne PM monitoring: the port of Civitavecchia (Italy) during COVID-19 lockdown. Atmos.  
771 Environ. under Submiss.
- 772 Lusher, A.L., McHugh, M., Thompson, R.C., 2013. Occurrence of microplastics in the gastrointestinal  
773 tract of pelagic and demersal fish from the English Channel. Mar. Pollut. Bull. 67, 94–99.  
774 doi:10.1016/j.marpolbul.2012.11.028
- 775 Lusher, A.L., Tirelli, V., O'Connor, I., Officer, R., 2015. Microplastics in Arctic polar waters: the first  
776 reported values of particles in surface and sub-surface samples. Sci. Rep. 5, 14947.  
777 doi:10.1038/srep14947
- 778 Mahto, S.K., Chandra, P., Rhee, S.W., 2010. In vitro models, endpoints and assessment methods for  
779 the measurement of cytotoxicity. Toxicol. Environ. Health Sci. 2, 87–93.  
780 doi:10.1007/BF03216487
- 781 Mancini, E., Miccoli, A., Piazzolla, D., Saraceni, P.R., Lezzi, M., Tiralongo, F., Bonifazi, A., Picchietti,  
782 S., Marcelli, M., 2021. Macrozoobenthic fauna associated with benthic marine litter (Northern  
783 Tyrrhenian Sea, Italy) and first report of two bryozoan species in Italian waters. Reg. Stud. Mar.  
784 Sci. 47, 101912. doi:10.1016/j.rsma.2021.101912
- 785 Mancuso, M., Savoca, S., Bottari, T., 2019. First record of microplastics ingestion by European hake  
786 *Merluccius merluccius* from the Tyrrhenian Sicilian coast (Central Mediterranean Sea). J. Fish  
787 Biol. 94, 517–519. doi:10.1111/jfb.13920
- 788 Mazurais, D., Ernande, B., Quazuguel, P., Severe, A., Huelvan, C., Madec, L., Mouchel, O., Soudant,  
789 P., Robbens, J., Huvet, A., Zambonino-Infante, J., 2015. Evaluation of the impact of  
790 polyethylene microbeads ingestion in European sea bass (*Dicentrarchus labrax*) larvae. Mar.  
791 Environ. Res. 112, 78–85. doi:10.1016/j.marenvres.2015.09.009
- 792 Miccoli, A., Buonocore, F., Picchietti, S., Scapigliati, G., 2021a. The sea bass *Dicentrarchus labrax* as  
793 a marine model species in immunology : Insights from basic and applied research. Aquac. Fish.

- 794 doi:10.1016/j.aaf.2021.09.003
- 795 Miccoli, A., Guerra, L., Pianese, V., Saraceni, P.R., Buonocore, F., Taddei, A.R., Couto, A., Wolf, T.  
796 De, Fausto, A.M., Scapigliati, G., Picchiatti, S., 2021b. Molecular , Cellular and Functional  
797 Analysis of TR  $\gamma$  Chain along the European Sea Bass *Dicentrarchus labrax* Development. *Int. J.*  
798 *Mol. Sci.* 22, 3376. doi:ijms22073376
- 799 Moore, C.J., 2008. Synthetic polymers in the marine environment: A rapidly increasing, long-term  
800 threat. *Environ. Res.* 108, 131–139. doi:10.1016/j.envres.2008.07.025
- 801 Nguyen, T.H., Tang, F.H.M., Maggi, F., 2020. Sinking of microbial-associated microplastics in natural  
802 waters. *PLoS One* 15, e0228209. doi:10.1371/journal.pone.0228209
- 803 OECD, 2021. Test No. 249: Fish Cell Line Acute Toxicity - The RTgill-W1 cell line assay, OECD  
804 Guidelines for the Testing of Chemicals, Section 2. OECD, Paris. doi:10.1787/C66D5190-EN
- 805 Pannetier, P., Morin, B., Le Bihanic, F., Dubreil, L., Clérandeau, C., Chouvellon, F., Van Arkel, K.,  
806 Danion, M., Cachot, J., 2020. Environmental samples of microplastics induce significant toxic  
807 effects in fish larvae. *Environ. Int.* 134, 105047. doi:10.1016/j.envint.2019.105047
- 808 Panti, C., Giannetti, M., Baini, M., Rubegni, F., Minutoli, R., Fossi, M.C., 2015. Occurrence, relative  
809 abundance and spatial distribution of microplastics and zooplankton NW of Sardinia in the  
810 Pelagos Sanctuary Protected Area, Mediterranean Sea. *Environ. Chem.* 12, 618.  
811 doi:10.1071/EN14234
- 812 Pedà, C., Caccamo, L., Fossi, M.C., Gai, F., Andaloro, F., Genovese, L., Perdichizzi, A., Romeo, T.,  
813 Maricchiolo, G., 2016. Intestinal alterations in European sea bass *Dicentrarchus labrax*  
814 (Linnaeus, 1758) exposed to microplastics: Preliminary results. *Environ. Pollut.*  
815 doi:10.1016/j.envpol.2016.01.083
- 816 Piazzolla, D., Cafaro, V., de Lucia, G.A., Mancini, E., Scanu, S., Bonamano, S., Piermattei, V.,  
817 Vianello, A., Della Ventura, G., Marcelli, M., 2020. Microlitter pollution in coastal sediments of the  
818 northern Tyrrhenian Sea, Italy: microplastics and fly-ash occurrence and distribution. *Estuar.*  
819 *Coast. Shelf Sci.* doi:10.1016/j.ecss.2020.106819
- 820 Pittura, L., Avio, C.G., Giuliani, M.E., D'Errico, G., Keiter, S.H., Cormier, B., Gorbi, S., Regoli, F.,  
821 2018. Microplastics as Vehicles of Environmental PAHs to Marine Organisms: Combined  
822 Chemical and Physical Hazards to the Mediterranean Mussels, *Mytilus galloprovincialis*. *Front.*  
823 *Mar. Sci.* 5. doi:10.3389/fmars.2018.00103

- 824 Prevenios, M., Zeri, C., Tsangaris, C., Liubartseva, S., Fakiris, E., Papatheodorou, G., 2018. Beach  
825 litter dynamics on Mediterranean coasts: Distinguishing sources and pathways. *Mar. Pollut. Bull.*  
826 129, 448–457. doi:10.1016/j.marpolbul.2017.10.013
- 827 Primpke, S., Wirth, M., Lorenz, C., Gerdts, G., 2018. Reference database design for the automated  
828 analysis of microplastic samples based on Fourier transform infrared (FTIR) spectroscopy. *Anal.*  
829 *Bioanal. Chem.* 410, 5131–5141. doi:10.1007/s00216-018-1156-x
- 830 Renzi, M., Blašković, A., Bernardi, G., Russo, G.F., 2018. Plastic litter transfer from sediments  
831 towards marine trophic webs: A case study on holothurians. *Mar. Pollut. Bull.* 135, 376–385.  
832 doi:10.1016/j.marpolbul.2018.07.038
- 833 Revel, M., Roman, C., Châtel, A., 2021. Is cell culture a suitable tool for the evaluation of micro- and  
834 nanoplastics ecotoxicity? *Ecotoxicology* 30, 421–430. doi:10.1007/s10646-021-02355-z
- 835 Rios-Fuster, B., Alomar, C., Compa, M., Guijarro, B., Deudero, S., 2019. Anthropogenic particles  
836 ingestion in fish species from two areas of the western Mediterranean Sea. *Mar. Pollut. Bull.*  
837 144, 325–333. doi:10.1016/j.marpolbul.2019.04.064
- 838 Rios-Fuster, B., Arechavala-Lopez, P., García-Marcos, K., Alomar, C., Compa, M., Álvarez, E., Julià,  
839 M.M., Solomando Martí, A., Sureda, A., Deudero, S., 2021. Experimental evidence of  
840 physiological and behavioral effects of microplastic ingestion in *Sparus aurata*. *Aquat. Toxicol.*  
841 231, 105737. doi:10.1016/j.aquatox.2020.105737
- 842 Rios, L.M., Moore, C., Jones, P.R., 2007. Persistent organic pollutants carried by synthetic polymers  
843 in the ocean environment. *Mar. Pollut. Bull.* 54, 1230–1237.  
844 doi:10.1016/j.marpolbul.2007.03.022
- 845 Rogers, K.L., Carreres-Calabuig, J.A., Gorokhova, E., Posth, N.R., 2020. Micro-by-micro interactions:  
846 How microorganisms influence the fate of marine microplastics. *Limnol. Oceanogr. Lett.* 5, 18–  
847 36. doi:10.1002/lol2.10136
- 848 Ru, J., Huo, Y., Yang, Y., 2020. Microbial Degradation and Valorization of Plastic Wastes. *Front.*  
849 *Microbiol.* 11. doi:10.3389/fmicb.2020.00442
- 850 Sabatella, E.C., Colloca, F., Coppola, G., Fiorentino, F., Gambino, M., Malvarosa, L., Sabatella, R.,  
851 2017. Key Economic Characteristics of Italian Trawl Fisheries and Management Challenges.  
852 *Front. Mar. Sci.* 4. doi:10.3389/fmars.2017.00371
- 853 Sala, A., Conides, A., De Carlo, F., Klaoudatos, D., Grech, D., Lucchetti, A., Mayans, A., Notti, E.,

- 854 Paci, N., Salom, S., Sartor, P., Sbrana, M., Soler, I., Spedicato, M.T., Virgili, M., 2013. Final  
855 project report Technical specifications of Mediterranean trawl gears (myGears).  
856 doi:10.13140/RG.2.2.24528.76804
- 857 Savoca, S., Capillo, G., Mancuso, M., Bottari, T., Crupi, R., Branca, C., Romano, V., Faggio, C.,  
858 D'Angelo, G., Spanò, N., 2019. Microplastics occurrence in the Tyrrhenian waters and in the  
859 gastrointestinal tract of two congener species of seabreams. *Environ. Toxicol. Pharmacol.* 67,  
860 35–41. doi:10.1016/j.etap.2019.01.011
- 861 Scapigliati, G., Fausto, A.M., Picchiatti, S., 2018. Fish Lymphocytes: An Evolutionary Equivalent of  
862 Mammalian Innate-Like Lymphocytes? *Front. Immunol.* 9, 1–8. doi:10.3389/fimmu.2018.00971
- 863 Schoonen, W.G.E.J., de Roos, J.A.D.M., Westerink, W.M.A., Débiton, E., 2005. Cytotoxic effects of  
864 110 reference compounds on HepG2 cells and for 60 compounds on HeLa, ECC-1 and CHO  
865 cells. *Toxicol. Vitro.* 19, 491–503. doi:10.1016/j.tiv.2005.01.002
- 866 Sendra, M., Pereiro, P., Yeste, M.P., Mercado, L., Figueras, A., Novoa, B., 2021. Size matters:  
867 Zebrafish (*Danio rerio*) as a model to study toxicity of nanoplastics from cells to the whole  
868 organism. *Environ. Pollut.* 268, 115769. doi:10.1016/j.envpol.2020.115769
- 869 Shim, W.J., Hong, S.H., Eo, S., 2018. Marine Microplastics: Abundance, Distribution, and  
870 Composition, in: Zeng, E. (Ed.), *Microplastic Contamination in Aquatic Environments*. Elsevier,  
871 pp. 1–26. doi:10.1016/B978-0-12-813747-5.00001-1
- 872 Suaria, G., Avio, C.G., Mineo, A., Lattin, G.L., Magaldi, M.G., Belmonte, G., Moore, C.J., Regoli, F.,  
873 Aliani, S., 2016. The Mediterranean Plastic Soup: Synthetic polymers in Mediterranean surface  
874 waters. *Sci. Rep.* 6, 1–10. doi:10.1038/srep37551
- 875 Sussarellu, R., Suquet, M., Thomas, Y., Lambert, C., Fabioux, C., Pernet, M.E.J., Le Goïc, N.,  
876 Quillien, V., Mingant, C., Epelboin, Y., Corporeau, C., Guyomarch, J., Robbens, J., Paul-Pont, I.,  
877 Soudant, P., Huvet, A., 2016. Oyster reproduction is affected by exposure to polystyrene  
878 microplastics. *Proc. Natl. Acad. Sci.* 113, 2430–2435. doi:10.1073/pnas.1519019113
- 879 Tekman, M.B., Gutow, L., Macario, A., Haas, A., Walter, A., Bergmann, M., 2021. LITTERBASE  
880 [WWW Document]. Alfred Wegener Inst. Helmholtz Cent. Polar Mar. Res. URL  
881 [https://litterbase.awi.de/litter\\_detail](https://litterbase.awi.de/litter_detail)
- 882 Thompson, R.C., Olsen, Y., Mitchell, R.C., Davis, A., Rowland, S.J., John, A.W.G., McGonigle, D.,  
883 Russel, A.E., 2004. Lost at Sea: Where Is All the Plastic? *Science* (80-. ). 304, 838–838.

- 884 doi:10.1126/science.1094559
- 885 Tiralongo, F., Mancini, E., Ventura, D., de Malherbe, S., Paladini de Mendoza, F., Sardone, M.,  
886 Arciprete, R., Massi, D., Marcelli, M., Fiorentino, F., Minervini, R., 2021. Commercial catches  
887 and discards composition in the central Tyrrhenian Sea: a multispecies quantitative and  
888 qualitative analysis from shallow and deep bottom trawling. *Mediterr. Mar. Sci.* 22, 521–531.  
889 doi:10.12681/mms.25753
- 890 UNEP/MAP, 2015. Marine litter assessment in the Mediterranean Sea. Athens (Greece).
- 891 UNEP, 2016. Marine plastic debris and microplastics - Global Lessons and Research to Inspire Action  
892 and guide policy change, UN.
- 893 UNEP, 2014. Valuing Plastics: The Business Case for Measuring, Managing and Disclosing Plastic  
894 Use in the Consumer Goods Industry, UN.
- 895 van der Hal, N., Ariel, A., Angel, D.L., 2017. Exceptionally high abundances of microplastics in the  
896 oligotrophic Israeli Mediterranean coastal waters. *Mar. Pollut. Bull.*  
897 doi:10.1016/j.marpolbul.2016.12.052
- 898 Van Sebille, E., Aliani, S., Law, K.L., Maximenko, N., Alsina, J.M., Bagaev, A., Bergmann, M.,  
899 Chapron, B., Chubarenko, I., Cózar, A., Delandmeter, P., Egger, M., Fox-Kemper, B., Garaba,  
900 S.P., Goddijn-Murphy, L., Hardesty, B.D., Hoffman, M.J., Isobe, A., Jongedijk, C.E., Kaandorp,  
901 M.L.A., Khatmullina, L., Koelmans, A.A., Kukulka, T., Laufkötter, C., Lebreton, L., Lobelle, D.,  
902 Maes, C., Martinez-Vicente, V., Morales Maqueda, M.A., Poulain-Zarcos, M., Rodríguez, E.,  
903 Ryan, P.G., Shanks, A.L., Shim, W.J., Suaria, G., Thiel, M., Van Den Bremer, T.S., Wichmann,  
904 D., 2020. The physical oceanography of the transport of floating marine debris. *Environ. Res.*  
905 *Lett.* doi:10.1088/1748-9326/ab6d7d
- 906 van Sebille, E., Wilcox, C., Lebreton, L., Maximenko, N., Hardesty, B.D., van Franeker, J.A., Eriksen,  
907 M., Siegel, D., Galgani, F., Law, K.L., 2015. A global inventory of small floating plastic debris.  
908 *Environ. Res. Lett.* 10, 124006. doi:10.1088/1748-9326/10/12/124006
- 909 Vasilopoulou, G., Kehayias, G., Kletou, D., Kleitou, P., Triantafyllidis, V., Zotos, A., Antoniadis, K.,  
910 Rousou, M., Papadopoulos, V., Polykarpou, P., Tsiamis, G., 2021. Microplastics Investigation  
911 Using Zooplankton Samples from the Coasts of Cyprus (Eastern Mediterranean). *Water* 2021,  
912 Vol. 13, Page 2272 13, 2272. doi:10.3390/W13162272
- 913 Wright, S.L., Thompson, R.C., Galloway, T.S., 2013. The physical impacts of microplastics on marine



- 914 organisms: A review. *Environ. Pollut.* 178, 483–492. doi:10.1016/j.envpol.2013.02.031
- 915 Yong, C., Valiyaveetil, S., Tang, B., 2020. Toxicity of Microplastics and Nanoplastics in Mammalian  
916 Systems. *Int. J. Environ. Res. Public Health* 17, 1509. doi:10.3390/ijerph17051509
- 917 Zapata, A., Diez, B., Cejalvo, T., Gutiérrez-De Frías, C., Cortés, A., 2006. Ontogeny of the immune  
918 system of fish. *Fish Shellfish Immunol.* 20, 126–136. doi:10.1016/j.fsi.2004.09.005
- 919 Zettler, E.R., Mincer, T.J., Amaral-Zettler, L.A., 2013. Life in the “Plastisphere”: Microbial Communities  
920 on Plastic Marine Debris. *Environ. Sci. Technol.* 47, 7137–7146. doi:10.1021/es401288x
- 921 Zhang, W., Zhang, S., Wang, J., Wang, Y., Mu, J., Wang, P., Lin, X., Ma, D., 2017. Microplastic  
922 pollution in the surface waters of the Bohai Sea, China. *Environ. Pollut.* 231, 541–548.  
923 doi:10.1016/j.envpol.2017.08.058
- 924 Zhao, S., Zhu, L., Wang, T., Li, D., 2014. Suspended microplastics in the surface water of the Yangtze  
925 Estuary System, China: First observations on occurrence, distribution. *Mar. Pollut. Bull.* 86, 562–  
926 568. doi:10.1016/j.marpolbul.2014.06.032
- 927 Zitouni, N., Bousserhine, N., Missawi, O., Boughattas, I., Chèvre, N., Santos, R., Belbekhouche, S.,  
928 Alphonse, V., Tisserand, F., Balmassiere, L., Dos Santos, S.P., Mokni, M., Guerbej, H., Banni,  
929 M., 2021. Uptake, tissue distribution and toxicological effects of environmental microplastics in  
930 early juvenile fish *Dicentrarchus labrax*. *J. Hazard. Mater.* 403.  
931 doi:10.1016/j.jhazmat.2020.124055
- 932 Zwollo, P., Quddos, F., Bagdassarian, C., Seeley, M.E., Hale, R.C., Abderhalden, L., 2021.  
933 Polystyrene microplastics reduce abundance of developing B cells in rainbow trout  
934 (*Oncorhynchus mykiss*) primary cultures. *Fish Shellfish Immunol.* 114, 102–111.  
935 doi:10.1016/j.fsi.2021.04.014  
936
